# Supplementary material for: Experiences of healthcare providers during the coronavirus pandemic and its impact on them: protocol for a mixed-methods systematic review
Source: PubMed Central journal article supplement — BMJ Open. 2021 Feb 26;11(2):e043686. doi: 10.1136/bmjopen-2020-043686 (PMC7918807; doi:10.1136/bmjopen-2020-043686), 2021-02-26
Supplement: bmjopen-2020-043686.draft_revisions.pdf [file bmjopen-2020-043686.draft_revisions.pdf]

# BMJ Open

BMJ Open is committed to open peer review. As part of this commitment we make the peer review history of every article we publish publicly available.

When an article is published we post the peer reviewers' comments and the authors' responses online. We also post the versions of the paper that were used during peer review. These are the versions that the peer review comments apply to.

The versions of the paper that follow are the versions that were submitted during the peer review process. They are not the versions of record or the final published versions. They should not be cited or distributed as the published version of this manuscript.

BMJ Open is an open access journal and the full, final, typeset and author-corrected version of record of the manuscript is available on our site with no access controls, subscription charges or pay-per-view fees (<http://bmjopen.bmj.com>).

If you have any questions on BMJ Open's open peer review process please email [info.bmjopen@bmj.com](mailto:info.bmjopen@bmj.com)

# BMJ Open

## The experiences and impacts of health-care providers during the Coronavirus pandemic: protocol for a mixed methods systematic review

|                               |                                                                                                                                                                                                                                                                                                                                     |
|-------------------------------|-------------------------------------------------------------------------------------------------------------------------------------------------------------------------------------------------------------------------------------------------------------------------------------------------------------------------------------|
| Journal:                      | <i>BMJ Open</i>                                                                                                                                                                                                                                                                                                                     |
| Manuscript ID                 | bmjopen-2020-043686                                                                                                                                                                                                                                                                                                                 |
| Article Type:                 | Protocol                                                                                                                                                                                                                                                                                                                            |
| Date Submitted by the Author: | 11-Aug-2020                                                                                                                                                                                                                                                                                                                         |
| Complete List of Authors:     | Xu, Na; Xi'an Jiaotong University, Health Science Center<br>Lv, AiLi; Xi'an Jiaotong University<br>Li, TianZi; Xi'an Jiaotong University, Health Science Center<br>Li, XiaoFeng; Tongji University Tenth People's Hospital<br>Huang, Mei; Air Force Medical University, Department of Nursing<br>Su, Yan; Xi'an Jiaotong University |
| Keywords:                     | COVID-19, Anxiety disorders < PSYCHIATRY, Depression & mood disorders < PSYCHIATRY, QUALITATIVE RESEARCH, Health & safety < HEALTH SERVICES ADMINISTRATION & MANAGEMENT                                                                                                                                                             |
|                               |                                                                                                                                                                                                                                                                                                                                     |

SCHOLARONE™  
Manuscripts

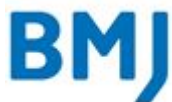

I, the Submitting Author has the right to grant and does grant on behalf of all authors of the Work (as defined in the below author licence), an exclusive licence and/or a non-exclusive licence for contributions from authors who are: i) UK Crown employees; ii) where BMJ has agreed a CC-BY licence shall apply, and/or iii) in accordance with the terms applicable for US Federal Government officers or employees acting as part of their official duties; on a worldwide, perpetual, irrevocable, royalty-free basis to BMJ Publishing Group Ltd ("BMJ") its licensees and where the relevant Journal is co-owned by BMJ to the co-owners of the Journal, to publish the Work in this journal and any other BMJ products and to exploit all rights, as set out in our [licence](#).

The Submitting Author accepts and understands that any supply made under these terms is made by BMJ to the Submitting Author unless you are acting as an employee on behalf of your employer or a postgraduate student of an affiliated institution which is paying any applicable article publishing charge ("APC") for Open Access articles. Where the Submitting Author wishes to make the Work available on an Open Access basis (and intends to pay the relevant APC), the terms of reuse of such Open Access shall be governed by a Creative Commons licence – details of these licences and which [Creative Commons](#) licence will apply to this Work are set out in our licence referred to above.

Other than as permitted in any relevant BMJ Author's Self Archiving Policies, I confirm this Work has not been accepted for publication elsewhere, is not being considered for publication elsewhere and does not duplicate material already published. I confirm all authors consent to publication of this Work and authorise the granting of this licence.

## Review

### **The experiences and impacts of health-care providers during the Coronavirus pandemic: protocol for a mixed methods systematic review**

Na Xu <sup>1</sup>, Aili Lv <sup>1\*</sup>, Tianzi Li <sup>1</sup>, Xiaofeng Li <sup>2</sup>, Mei Huang <sup>3</sup>, Yan Su <sup>1</sup>

<sup>1</sup> Health Science Center, Xi'an Jiaotong University, Xi'an, (Shaan Xi,) China

<sup>2</sup> Tongji University Tenth People's Hospital, Shang Hai, China

<sup>3</sup> Department of Nursing, Air Force Medical University, Xi'an, (Shaan Xi,) China

\*Corresponding Author

Aili Lv

Health Science Center

Xi'an Jiaotong University

No.76 Yanta West Road

Xi'an, Shaan Xi, 710061, China

Tel: 13709209696

1  
2  
3  
4  
5  
6  
7  
8  
9  
10  
11  
12  
13  
14  
15  
16  
17  
18  
19  
20  
21  
22  
23  
24  
25  
26  
27  
28  
29  
30  
31  
32  
33  
34  
35  
36  
37  
38  
39  
40  
41  
42  
43  
44  
45  
46  
47  
48  
49  
50  
51  
52  
53  
54  
55  
56  
57  
58  
59  
60

Fax:029-82657015

E-mail: aili@mail.xjtu.edu.c

For peer review only

## Abstract

**Introduction:** Frontline health-care providers are redeployed to areas outside their clinical expertise and assigned high-loading workload to address the surge of patients with each coronavirus outbreaks. Their importance in crisis is not in doubt. However, they experienced considerable physical distress and psychological stressors, even leading to psychological illness and infection in this environment. There is an urgent need to accurately, comprehensively and objectively understand their experiences, perceptions and current situation of anxiety, depression, insomnia and coronavirus infection. Therefore, this protocol is to conduct a mixed methods systematic review to summarize the evidence on the experiences of health-care providers and impacts on their psychological and infection during the coronavirus pandemics.

**Methods:** Published studies on experience, perspective, impact, anxiety, depression, insomnia, and infection of health-care providers with SRAS, MERS, and COVID-19 and written in English and Chinese will be accepted. Databases (MEDLINE, EMBASE, CENTRAL, Web of Science, PubMed, PsycINFO, WanFang, and SinoMed) from inception until 30 July 2020 will be searched. Two reviewers will select, screen, extract data, and assess the risk of bias independently. Risk of bias of results will be using the MMAT. Using a convergent integrated approach on qualitative/quantitative studies, we will synthesise qualitative and quantitative data separately. The incidence and number of cases about anxiety, depression, insomnia and coronavirus infected among medical staff will be extracted. Then we will transform quantitative data to synthesise narratively findings. This protocol will be reported per the PRISMA-P guidelines.

**Conclusion:** This mixed methods systematic review will be expected to provide a comprehensive picture of experiences and impacts of health-care providers during coronavirus outbreaks through subject description and scale quantification.

**Ethics and dissemination:** Ethical assessment is not required due to the nature of the proposed systematic review. Findings of our research will be disseminated at conferences related to this field and through publication in peer-reviewed journals.

**PROSPERO registration number:** CRD42020198506.

**Strengths and limitations of this study:**

1  
2  
3  
4 1) This is the first mixed methods systematic review that assessing the experience and impact  
5 of health-care providers during the coronavirus outbreak.  
6

7  
8 2) We will comprehensive understand that the health-care providers' real experiences and  
9 impacts when their lives and security are threatened. This is also stronger evidence in clinical  
10 practice of sustained and comprehensive support policies and measures adopted to improve  
11 their physical and mental feelings and health.  
12  
13

14  
15 3) This study will include only English and Chinese, and similar topics in other languages were  
16 ignored.  
17  
18

19  
20 4) The study limitation is that there is no guarantee the quality of the included research and  
21 that the definition of first-line health care workers is non-standardised.  
22  
23

24  
25 **Abbreviations:** SRAS: Sever Acute Respiratory Syndrome; MERS: Middle East Respiratory  
26 Syndrome; COVID-19: Coronavirus Disease 2019; MMAT: Mixed-Methods Appraisal Tool;  
27 PRISMA-P: Preferred Reporting Items for Systematic reviews and Meta-Analysis protocol  
28  
29

30  
31 **Keywords:** Coronavirus; Experience; Impact; Health-care providers; Systematic review  
32  
33  
34  
35  
36  
37  
38  
39  
40  
41  
42  
43  
44  
45  
46  
47  
48  
49  
50  
51  
52  
53  
54  
55  
56  
57  
58  
59  
60

## 1 Introduction

2 Coronaviruses are a kind of single-stranded, positive-sense RNA viruses with envelope  
3 nonsegmented, which exists in nature widely<sup>[1]</sup>. This host-specific viruses infect other  
4 mammals, birds and even humans frequently, and lead to diverse clinical syndromes in  
5 humans, including respiratory, digestive, liver, and neurological disorders<sup>[2]</sup>. Previous studies  
6 have identified six coronaviruses can cause human diseases. Four viruses are prevalent and  
7 typically trigger common cold symptoms in immuno competent individuals, such as 229E,  
8 OC43, NL63, and HKU1. The two other viruses, Sever Acute Respiratory Syndrome  
9 Coronavirus (SARS-CoV) and Middle East Respiratory Syndrome Coronavirus  
10 (MERS-CoV), are characterized by zoonosis and highly pathogenic, increasing the risk of  
11 deaths<sup>[3]</sup>.

12 Coronavirus of highly pathogenic has been spread in humans for hundreds of years through  
13 contact, droplets, aerosols, etc. The number of deaths due to infection SARS-CoV 2-4 and  
14 MERS-CoV far exceeded 10,000 in the past two decades<sup>[4]</sup>. Every outbreak of coronavirus  
15 has a tremendous impact on human life and health. World Health Organization (WHO)  
16 confirmed 8098 cases and 774 (9.6%) deaths during the Sever Acute Respiratory  
17 Syndrome(SARS) outbreak in 2002. Similarly, 2494 infections and 34.4% deaths were  
18 confirmed during the Middle East Respiratory Syndrome(MERS) epidemic from 2012 to  
19 2018. Because of the high infection rate and wide spread, coronaviruses infecting poses a  
20 constant threat to human health.

21 Coronavirus Disease 2019 (COVID-2019) is an infectious respiratory illness caused by a  
22 novel coronavirus. COVID-2019 infection event is the third outbreak of coronavirus  
23 cross-species transmission of sudden public health events after SARS and MERS. First



1  
2  
3 24 reported in Wuhan city, Hubei province, China, in late December 2019, and ongoing  
4  
5 25 outbreak widespread all across the world. As of July 16, 2020, there have been 13,378,853  
6  
7  
8 26 confirmed cases of COVID-19 globally, including 580,045 deaths, already circulating in 216  
9  
10 27 countries, with the USA being the current epicentre with 3,405,494 confirmed cases and  
11  
12 28 135,807 deaths so far<sup>[5]</sup>. WHO declared a state of emergency and could confront long-term  
13  
14 29 challenges worldwide<sup>[6]</sup>.

15  
16  
17 30 Every outbreak of a new disease, the demand for resources, especially health-care providers  
18  
19 31 and medical supplies, has increased greatly around the world. In order to resolve this situation,  
20  
21 32 most hospitals have to rapidly reconfigure clinical spaces and restructure clinical teams.  
22  
23 33 Therefore, many health-care providers are redeployed to areas outside their clinical expertise  
24  
25 34 and are assigned high-loading workload to address the surge of patients with COVID-19. The  
26  
27 35 importance of health-care providers in this crisis is not in doubt<sup>[6]</sup>. Their health and safety can  
28  
29 36 affect the effectiveness of patients' treatment and care. To a certain extent, it can also  
30  
31 37 determine the control of any outbreak<sup>[7]</sup>. However, they also face great challenges<sup>[8]</sup>.

32  
33  
34 38 Frontline health-care providers are ambivalent about choosing between responsibility and  
35  
36 39 self-protection in the early stages of the epidemic. They fear infection and worry about their  
37  
38 40 families during outbreaks, but still apply to join the fight whether it is because of the  
39  
40 41 responsibility of the self or the requirements of superior leadership in the face of unknown  
41  
42 42 diseases and unpredictable risks<sup>[9]</sup>. Health-care providers experienced considerable physical  
43  
44 43 distress when working with patients diagnosed with SRAS, MERS, and COVID-19<sup>[10, 11]</sup>.  
45  
46 44 They were exhausted owing to the intensive care they provided during long shifts in  
47  
48 45 protective suits without toilet breaks. The combination of heavy protective clothing and the  
49  
50 46 hot environmental conditions made awkward for them to move, difficult to breathe, hard to  
51  
52 47 hear, and covered with sweat they were unable to wipe off<sup>[12]</sup>. Health-care providers also

1  
2  
3 48 experienced significant psychological stressors. Recent evidence suggests that even someone  
4  
5 49 who is non-symptomatic can spread COVID-19 with high efficiency. At the same time, little  
6  
7 50 was known about the new virus, including its lethality or how to best care for these  
8  
9 51 patients<sup>[13]</sup>. And they always witness the death of infected people. Hence, they experienced  
10  
11 52 fear of getting infected themselves and spreading infection to their family members. Social  
12  
13 53 stressors experienced by doctors and nurses were particularly high. Not only families but also  
14  
15 54 neighbors or community residents did not want to risk possible exposure to themselves by  
16  
17 55 having a member working in the hospitals<sup>[14, 15]</sup>. They refused to support the caregivers' work  
18  
19 56 and even tried to prevent the medical staff from going home after finishing work. This added  
20  
21 57 social stress to the nurses or doctors. Moreover, some environmental stress, such as cultural  
22  
23 58 differences of medical staff between different regions, lack of supplies, temporary  
24  
25 59 workplaces, raised the health-care workers' sense of helplessness and frustration<sup>[9]</sup>. But some  
26  
27 60 of the studies found that health-care providers showed great strength and resilience in the face  
28  
29 61 of various challenges. Meanwhile, they had an extraordinary sense of responsibility and a  
30  
31 62 strong spirit of teamwork when treating patients with coronavirus<sup>[16]</sup>. Several studies have  
32  
33 63 discussed the experience of health care providers in the face of the epidemic. In this case,  
34  
35 64 systematic review of qualitative study can improve the reliability, generality and policy  
36  
37 65 reference of qualitative research results. In this way, the experiences or perceptions of  
38  
39 66 medical staff are more comprehensively described during an outbreak.  
40  
41  
42  
43  
44  
45  
46  
47

48 67 Furthermore, it is worth noting that due to coronavirus outbreaks have led to various  
49  
50 68 psychological disorders and illnesses among many health care professionals, such as anxiety,  
51  
52 69 depression, insomnia and even infection. Stress reaction symptoms have been reported in  
53  
54 70 about 10% of healthcare workers in the course and in the aftermath of previous outbreaks of  
55  
56 71 SARS and MERS<sup>[17,18]</sup>. Similar challenges have arisen in United States, Canada, Taiwan and  
57  
58  
59  
60

1  
2  
3 72 Hong Kong<sup>[19-23]</sup> . In a cross-sectional survey of 1257 health-care workers in China during the  
4  
5  
6 73 COVID-19 pandemic, over 70% reported distress, with 50% reporting depression and 34%  
7  
8 74 insomnia was reported<sup>[16]</sup>. In addition, health professionals have become the most vulnerable  
9  
10 75 population to contract the coronavirus virus. Earlier studies reported that infected health care  
11  
12 76 providers accounted for 51% of the SARS cases<sup>[24]</sup>. However the prevalence of infection with  
13  
14 77 COVID-19 among healthcare workers was only 6% in Netherlands<sup>[25]</sup>. Similarly, on February  
15  
16  
17 78 7 the proportion of Chinese medical staff was infected growth of 26% for 2020, up from 3%  
18  
19 79 on January 1, 2020 <sup>[26,27]</sup>. Although many domestic and foreign studies have reported  
20  
21 80 psychological changes and incidence of coronavirus infection among medical staff, the  
22  
23 81 sample size of studies is different and the results exist visible differences. Therefore, there is  
24  
25 82 an urgent need for a systematic review of quantitative research to accurately,  
26  
27 83 comprehensively and objectively understand the current situation of anxiety, depression,  
28  
29 84 insomnia and coronavirus infection for health-care providers in their the industry during  
30  
31 85 outbreaks.  
32  
33  
34  
35

36 86 The main aim of the present protocol is to conduct a mixed methods systematic review to  
37  
38 87 summarize the evidence on the experiences of health-care providers and impacts on their  
39  
40 88 psychological and infection during the coronavirus pandemics.  
41  
42  
43  
44

## 45 89 **Methods**

### 46 47 48 90 *Protocol registration*

49  
50  
51 91 This mixed methods systematic review is reported according to Preferred Reporting Items for  
52  
53 92 Systematic reviews and Meta-Analysis protocol (PRISMA-P) guidelines<sup>[28]</sup>. The protocol has  
54  
55  
56  
57  
58  
59  
60

1  
2  
3 93 been registered in the International Prospective Register of Systematic Review (PROSPERO)  
4  
5 94 (CRD 42020198506, <https://www.crd.york.ac.uk>).  
6  
7  
8

9 95 ***Design***

10  
11  
12 96 The mixed methods systematic review incorporating quantitative and qualitative data is  
13  
14 97 conducted. The qualitative component is undertaken first to comprehensively explore the  
15  
16 98 experience and impact of health providers during the coronavirus pandemic. Then the  
17  
18 99 quantitative component of the psychological status and infected condition of caregivers is  
19  
20 100 used to generalize or prove the qualitative results that caregivers are significantly affected  
21  
22 101 during outbreaks. And this review using the convergent integrated approach in which data is  
23  
24 102 transformed in such a way that quantitative transformed in qualitative topics to description  
25  
26 103 and the synthesis of quantitative and qualitative studies results simultaneously<sup>[29]</sup>.  
27  
28  
29  
30

31  
32 104 ***(Insert Figer 1 about here.)***  
33  
34

35 105 ***Data Sources and Searches***

36  
37  
38 106 The literature searches have been conducted in electronic bibliographic databases, including  
39  
40 107 MEDLINE, EMBASE, the Cochrane Library (CENTRAL), Web of Science, PubMed,  
41  
42 108 Psychology Information (PsycINFO), 万方/Wan Fang data, and 中国生物医学文献数据库  
43  
44 109 /SinoMed, from inception until 30 July 2020.  
45  
46  
47  
48

49 110 An initial search of PubMed has consulted the original research and review, followed by the  
50  
51 111 identification of keywords found in each title and abstract. Enter these keywords into  
52  
53 112 “Medical terms (MeSH)” box for Advanced Search in the Cochrane library, further search  
54  
55 113 more synonymous terms. After that, add terms through 10 registered unpublished protocols of  
56  
57  
58  
59  
60

1  
2  
3  
4 114 the systematic review in PROSPERO. Ultimately, the following searching terms in **Table 1**  
5  
6 115 are used to perform the search. The search terms will be used a combination of MeSH terms,  
7  
8  
9 116 free-text words, and Boolean operators. The reference section of the included studies will be  
10  
11  
12 117 hand-searched for additional relevant studies. The detailed search strategy in PubMed is  
13  
14 118 shown in the **PDF** document (see online supplementary additional file 1).

17  
18 119 *(Insert Table 1 about here.)*

## 21 120 **Inclusion and exclusion criteria**

22  
23  
24 121 Only published studies are original articles, and studies that reported the experience,  
25  
26 122 perspective, anxiety, depression, insomnia, and infection rates of health-care providers who  
27  
28 123 took care of patients with SRAS, MERS, and COVID-19 will be accepted in this study. For  
29  
30 124 language restrictions, only studies in English and Chinese will be accepted.

### 34 125 *Types of participants*

35  
36  
37 126 This review will include studies where participants are health-care providers who treat and  
38  
39 127 cure the patients diagnosed with coronavirus infection, working in designated hospital and  
40  
41  
42 128 having a close contact with infected patients. The gender, age and major field of participants  
43  
44 129 will not be limited. But medical students or trainees will be excluded.

### 48 130 *Phenomenon of interest/exposure(s)*

49  
50  
51 131 Our phenomenon of interest will focus on studies that the experience, perspective and impact  
52  
53 132 of health-care providers who took care of patients will be all considered in qualitative review.  
54  
55 133 The term “experience” and “perspective” consisted of all factors impact on the feeling and  
56  
57 134 mood of providers from coronavirus. The “impact” defined as that health-care providers

1  
2  
3 135 perceive the impact by themselves, whether physical or psychological or lifestyle habits. This  
4  
5 136 review will consider quantitative studies that anxiety, depression, insomnia and infection  
6  
7 137 rates of health-care providers during the SRAS, MERS, and COVID-19 pandemic.  
8  
9  
10

### 11 138 ***Context***

12  
13  
14 139 This review will consider studies that were in the context of a pandemic caused by  
15  
16 140 coronavirus, including SRAS, MERS, and COVID-19. Coronavirus diagnosis was in  
17  
18 141 accordance with the World Health Organization.  
19  
20  
21

### 22 142 ***Types of studies***

23  
24  
25 143 We will include studies that use quantitative (including cross-sectional, cohort studies),  
26  
27 144 qualitative (including but not limited to, designs such as phenomenology, grounded theory,  
28  
29 145 ethnography, action research, qualitative description) and mixed-methods methodologies. We  
30  
31 146 will exclude case reports and articles, such as conference abstracts, editorials, letters, reviews  
32  
33 147 and commentaries. Systematic reviews and meta-analyses will not be included, but if a  
34  
35 148 systematic review is relevant to our topic we will refer to its inclusion articles and reference  
36  
37 149 list for additional potentially qualified studies.  
38  
39  
40  
41

### 42 150 ***Exclusion criteria***

43  
44  
45 151 Studies that did not report levels of anxiety, depression or morbidity for health-care providers  
46  
47 152 in pandemics, and studies that didn't state the number of patients will be excluded. Studies  
48  
49 153 that analysed mental and behavioural disorders due to the use of an existing primary disease,  
50  
51 154 alcohol and other drugs will not be included. Studies that measure anxiety, depression and  
52  
53 155 insomnia but do not use the universal international scale will be excluded.  
54  
55  
56  
57  
58  
59  
60

## 156 **Data collection and analysis**

### 157 *Data management*

158 Covidence systematic review management software, EndNote X9, will be used to assist with  
159 further data management<sup>[30]</sup>. All identified references following the search will be uploaded  
160 and collated into EndNote and duplicates will be removed from the list.

### 161 *Selection of studies*

162 In phase one, the title and the abstract of each identified study will be independently screened  
163 according to the established inclusion criteria by each of the two review authors (NX and TL)  
164 to determine which should be assessed further. Full-texts for the eligible titles and/or  
165 abstracts including those uncertain will be obtained for further assessment on whether to  
166 include in the study or not at the second stage.

167 In order for two reviewers to use consistent evaluation criteria for all retrieved results, we  
168 will conduct step-by-step calibration exercises for 30 studies before screening<sup>[31]</sup>. In case  
169 80% agreement is not reached, we will refine the inclusion and exclusion criteria and the  
170 calibration will be repeated until the threshold is reached. Disagreement between the two  
171 authors will be resolved through discussion and when needed there will be arbitration by a  
172 third reviewer(MH). Reasons for excluding full-text studies will be recorded.

### 173 *Data extraction*

174 A standardised form based on previous studies<sup>[32-34]</sup> will be used for data extraction. The form  
175 will be created by using a specially developed tool in a Microsoft Excel (2016) spreadsheet.  
176 In this systematic review the key data to be extracted as follows.

1  
2  
3 177 Research information: first author, year of publication, country of the study; Demographic  
4  
5 178 information: populations(doctors, nurses and others), hospital level, qualification for the job,  
6  
7  
8 179 sample size, age; Qualitative studies: study methods, contexts, culture, and interest  
9  
10 180 outcomes(the experiences, perspectives and impacts of health-care providers); Quantitative  
11  
12 181 studies: study design will be extracted. The incidence and number of cases about anxiety,  
13  
14 182 depression, insomnia and coronavirus infected among medical staff will be extracted.

15  
16  
17  
18 183 The extracted information from each paper will be checked for congruency and agreement by  
19  
20 184 two reviewers. If additional information or data are required, we will contact the authors of  
21  
22 185 the original studies through email for clarification or addition.  
23  
24  
25

### 26 186 ***Data synthesis and integration***

27  
28  
29 187 We will use a convergent integrated approach in accordance with Joanna Briggs Institute (JBI)  
30  
31 188 methodology for conducting a mixed-methods systematic review<sup>[34]</sup>.

32  
33  
34 189 In the first part, synthesize qualitative data by means of thematic synthesis using JBI-QARI  
35  
36 190 software systems. Under the premise of understanding the philosophical thought and  
37  
38 191 methodology of various qualitative studies, two reviewers(NX and TL) repeatedly read,  
39  
40 192 understand, analyze and explain the experiences, perspectives and impacts of medical  
41  
42 193 workers, and combine similar results to form new categories. Then, the new categories are  
43  
44 194 summed up as an integrated result to form new concepts or interpretations. Two reviewers  
45  
46 195 will independently analyse the extracted data and provide thematic codes. In order to derive a  
47  
48 196 matrix structure, both reviewers will discuss coding and identify thematic issues and  
49  
50 197 categories.  
51  
52  
53  
54  
55  
56  
57  
58  
59  
60



1  
2  
3 198 Part two, synthesis quantitative data and perform meta-analysis. Statistical analysis will be  
4  
5 199 conducted using Revman 5.3. P(Proportion) and SE(Standard Error) will be used to analyze  
6  
7  
8 200 the incidence of anxiety, depression, insomnia and infection. Results will be reported as  
9  
10 201 proportions with corresponding 95% confidence intervals (CIs). Between-study heterogeneity  
11  
12 202 will be assessed using the  $\chi^2$  test on Cochrane's Q statistic, 20 and quantified by calculating  
13  
14  
15  
16 203 the  $I^2$  statistic (with values of 25%, 50%, and 75% is representative of the low, medium, and  
17  
18 204 high heterogeneity, respectively). There will be a methodological heterogeneity between  
19  
20 205 studies included in this study because different scales are used to evaluate anxiety and  
21  
22 206 depression. We will use a random-effects meta-analysis to estimate the anxiety, depression,  
23  
24 207 insomnia and coronavirus infected among medical staff. The presence of publication bias will  
25  
26 208 be assessed using Egger's test and funnel plots. Pvalue < 0.10 on the Egger's test will be  
27  
28 209 considered statistically significant for publication bias.

31  
32  
33 210 The next step is data transformation<sup>[33]</sup>. According to the JBI convergent integrated approach,  
34  
35 211 quantitative data will be converted to "qualitative data" and be transfigured to textual or  
36  
37 212 narrative interpretations to answer the review question. In a final step, extract themes and  
38  
39 213 subtopics in shape of qualified textual description from qualitative results, whether  
40  
41 214 untransformed or transformed, and collate and categorise them according to consistencies of  
42  
43 215 content. These categories will then be subjected to a synthesis to produce a single  
44  
45 216 comprehensive set of synthesized findings that can be used as a basis for evidence-based  
46  
47 217 practice.

### 218 ***Planned sensitivity and subgroup analysis***

51  
52  
53 219 If the available data allows, we will conduct sensitivity analyses that exclude studies at high  
54  
55 220 risk of bias in order to determine its impact. Moreover, doctors, nurses and other medical

1  
2  
3 221 staff are all working together to combat the coronavirus pandemic, but they have different  
4  
5 222 duties and their experience may vary from each other. Hence, we plan to conduct subgroup  
6  
7 223 analyses to examine whether a profession has different experiences and impacts of nurses and  
8  
9 224 physicians (as well as other groups, such as pharmacists and respiratory therapists). Moreover,  
10  
11 225 we also try to do subgroup analysis by gender if we can.  
12  
13  
14  
15

## 16 226 **Assessment of risk and quality**

### 17 18 19 227 *Assessment of risk of bias in included studies.*

20  
21  
22 228 To assess the risk of bias of all articles selected, the methodological quality criteria,  
23  
24 229 Mixed-Methods Appraisal Tool (MMAT), version 2018 will be conducted using<sup>[35]</sup>. This  
25  
26 230 document comprises two parts: checklist (Part I) and explanation of the criteria (Part II). Each  
27  
28 231 part is divided into 5 smaller sections according to the category of research designs, and each  
29  
30 232 category includes 5 items respectively. All items from the MMAT will be rated as “Yes”,  
31  
32 233 “No” or “Can’t tell”<sup>[36]</sup>.  
33  
34  
35  
36

37 234 Whereby one reviewer (NX) will apply the MMAT criteria and a second reviewer (TL) will  
38  
39 235 verify the assessments independently. Any disputes will be resolved through discussion or a  
40  
41 236 third reviewer (MH). Regardless of the research quality, all studies will undergo extraction  
42  
43 237 and synthesis where possible.  
44  
45  
46  
47

### 48 238 *Assessing confidence in the findings*

49  
50 239 In order to determine the strength of gathered evidence, the 2010 JBI quality level of  
51  
52 240 evidence and grade of recommendation will be used<sup>[37]</sup>. It helps us to evaluate the quality of  
53  
54 241 evidence in the domains of feasibility, appropriateness, meaning, effectiveness and economy  
55  
56  
57  
58  
59  
60

1  
2  
3 242 by dividing the quality assessment into four grades, the recommended strength into a, b, c  
4  
5 243 three grades.  
6  
7  
8

### 9 244 **Timeline for review**

10  
11  
12 245 At the time of submitting this protocol, we have completed the electronic searches and  
13  
14 246 piloted the study selection process. This systematic review is scheduled to finish in October  
15  
16 247 2020.  
17  
18

### 19 20 248 **Discussion**

21  
22  
23 249 This protocol was registered and reported according to Preferred Reporting Items for  
24  
25 250 Systematic reviews and MetaAnalysis protocol (PRISMA-P) guidelines. The PRISMA flow  
26  
27 251 diagram in **Figure 2** will be used to record the review process in different phases<sup>[38]</sup>.  
28  
29

30  
31  
32 252 *(Insert Figure 2 about here.)*  
33

34 253 Healthcare providers face a variety of unpredictable challenges in caring for infected patients  
35  
36 254 in the context of coronavirus outbreaks. To our knowledge, there are few systematic reviews  
37  
38 255 that will assess the experience and impact of health-care providers during the coronavirus  
39  
40 256 outbreak. Comprehensive understanding of what their real experiences and impacts are will  
41  
42 257 have a significant meaningful when their lives and security are threatened. Meanwhile, this is  
43  
44 258 also stronger evidence in clinical practice of sustained and comprehensive support measures  
45  
46 259 to health care providers. Findings from this review will be shared in conferences, peer-review  
47  
48 260 journals, and social media platforms.  
49  
50  
51

### 52 53 54 261 **Conclusion**

1  
2  
3 262 This mixed methods systematic review will be expected to provide a comprehensive picture  
4  
5 263 of the experiences and impacts of front-line healthcare providers during the coronavirus  
6  
7  
8 264 outbreak through subject description and scale quantification.  
9

## 10 11 265 **Ethics and dissemination**

12  
13  
14 266 Ethical assessment is not required due to the nature of the proposed systematic review.  
15  
16 267 Findings of our research will be disseminated at conferences related to this field and through  
17  
18 268 publication in peer-reviewed journals.  
19

## 20 21 22 269 **Statements**

### 23 24 25 270 **Acknowledgement**

### 26 27 28 271 **Competing interests**

29  
30  
31 272 The authors have no conflicts of interest to declare.  
32

### 33 34 35 273 **Funding**

36  
37 274 This research received no specific grant from any funding agency in the public, commercial  
38  
39 275 or not-for-profit sectors.  
40

### 41 42 43 276 **Authors' contributions**

44  
45  
46 277 NX and AL conceived and designed the initial study. NX and TL drafted the initial protocol.  
47  
48 278 All authors contributed to the development of the selection criteria, the risk of a bias  
49  
50 279 assessment strategy, and data extraction criteria. AL is the guarantor of the review. All  
51  
52 280 authors read, provided feedback, and approved the final protocol before submission to the  
53  
54  
55 281 journal.  
56  
57  
58  
59  
60

## Reference

- DD R, RJ W, FG H. *Clinical Virology* (4th edn). Washington: ASM Press; 2016.
2. Zhu N, Zhang D, Wang W, et al. A Novel Coronavirus from Patients with Pneumonia in China, 2019. *New England Journal of Medicine*. 2020;382(8):727-733. doi: 10.1056/NEJMoa2001017.
  3. Su S, Wong G, Shi W, et al. Epidemiology, Genetic Recombination, and Pathogenesis of Coronaviruses. *Trends Microbiol*. 2016 Jun;24(6):490-502. doi: 10.1016/j.tim.2016.03.003. PubMed PMID: 27012512; PubMed Central PMCID: PMC7125511.
  4. Kuiken T, Fouchier RAM, Schutten M, et al. Newly discovered coronavirus as the primary cause of severe acute respiratory syndrome. *The Lancet*. 2003;362(9380):263-270. doi: 10.1016/s0140-6736(03)13967-0.
  5. WHO. Coronavirus disease (COVID-19) Pandemic World Health Organization2020. Available from: <https://www.who.int/emergencies/diseases/novel-coronavirus-2019>.
  6. Xiong Y, Peng L. Focusing on health-care providers' experiences in the COVID-19 crisis. *The Lancet Global Health*. 2020;8(6):e740-e741. doi: 10.1016/s2214-109x(20)30214-x.
  7. Chang D, Xu H, Rebaza A, et al. Protecting health-care workers from subclinical coronavirus infection. *The Lancet Respiratory Medicine*. 2020;8(3). doi: 10.1016/s2213-2600(20)30066-7.
  8. WHO. Coronavirus disease (COVID-19) outbreak: rights, roles and responsibilities of health workers, including key considerations for occupational safety and health: World Health Organization; 2020. Available from: <https://www.who.int/docs/default-source/coronaviruse/who-rights-rolesrespon-hw-covid-19.pdf?sfvrsn=bcabd4010> (accessed April 16, 2020).
  9. Liu Q, Luo D, Haase JE, et al. The experiences of health-care providers during the COVID-19 crisis in China: a qualitative study. *Lancet Global Health*. 2020 Jun;8(6):E790-E798. doi: 10.1016/s2214-109x(20)30204-7. PubMed PMID: WOS:000536463500026.
  10. Chou T-L, Ho L-Y, Wang K-Y, et al. Uniformed Service Nurses' Experiences with the Severe Acute Respiratory Syndrome Outbreak and Response in Taiwan. *Nursing Clinics of North America*. 2010;45(2):179-191. doi: 10.1016/j.cnur.2010.02.008.
  11. Kim Y. Nurses' experiences of care for patients with Middle East respiratory syndrome-coronavirus in South Korea. *American Journal of Infection Control*. 2018 Jul;46(7):781-787. doi: 10.1016/j.ajic.2018.01.012. PubMed PMID: WOS:000436956200014.

12. Urooj U, Ansari A, Siraj A, et al. Expectations, Fears and Perceptions of doctors during Covid-19 Pandemic. *Pakistan journal of medical sciences*. 2020 2020-May;36(COVID19-S4):S37-S42. doi: 10.12669/pjms.36.COVID19-S4.2643. PubMed PMID: MEDLINE:32582312.
13. Lee JY, Hong JH, Park EY. Beyond the fear: Nurses' experiences caring for patients with Middle East respiratory syndrome: A phenomenological study. *Journal of Clinical Nursing*. 2020. doi: 10.1111/jocn.15366. PubMed PMID: WOS:000541829500001.
14. Chen Q, Liang M, Li Y, et al. Mental health care for medical staff in China during the COVID-19 outbreak. *The Lancet Psychiatry*. 2020;7(4):e15-e16. doi: 10.1016/s2215-0366(20)30078-x.
15. HH P, CK C, CP C. Stress and coping behaviors of nurses caring for patients with SARS: an exploratory descriptive study. *Journal of Taiwan Nephrology Nursing Association* 2003;2:120–128.
16. Lai J, Ma S, Wang Y, et al. Factors Associated With Mental Health Outcomes Among Health Care Workers Exposed to Coronavirus Disease 2019. *JAMA Netw Open*. 2020;3(3):3976-3988. doi: 10.1001/jamanetworkopen.2020.3976. PubMed PMID: 32202646; PubMed Central PMCID: PMC7090843.
17. Mak IWC, Chu CM, Pan PC, et al. Long-term psychiatric morbidities among SARS survivors. *General Hospital Psychiatry*. 2009;31(4):318-326. doi: 10.1016/j.genhosppsych.2009.03.001.
18. Bai Y, Lin C-C, Lin C-Y, et al. Survey of stress reactions among health care workers involved with the SARS outbreak. *PSYCHIATRIC SERVICES*. 2004;55(9):1055–1057. doi: 9.
19. Park BJ, Peck AJ, Kuehnert MJ, et al. Lack of SARS Transmission among Healthcare Workers, United States. *Emerging Infectious Diseases*. 2004;10(2):244-248.
20. Maunder R, Hunter J, Vincent L, et al. The immediate psychological and occupational impact of the 2003 SARS outbreak in a teaching hospital. *Canadian Medical Association Journal*. 2003; 168(10):1245-1251.
21. YC L, BC S, YY C. The mental health of hospital workers dealing with severe acute respiratory syndrome. *Psychother Psychosom*. 2006;75(6):370-375. doi: 10.1159/000095443. PubMed Central PMCID: PMC17053338.
22. Lee AM, Wong JG, McAlonan GM, et al. Stress and Psychological Distress Among SARS Survivors 1 Year After the Outbreak. *The Canadian Journal of Psychiatry*. 2007 52(4):233-240.
23. Chua SE, Cheung V, Cheung C, et al. Psychological Effects of the SARS Outbreak in Hong Kong on High-Risk Health Care Workers. *The Canadian Journal of Psychiatry*. 2004;49(6):391-393.

- 1
- 2
- 3
- 4 24. CM B, LM M, GA T. Clinical features and short-term outcomes of 144 patients with SARS in the greater
- 5 Toronto area. *JAMA Netw Open*. 2003;289:2801–9.
- 6
- 7 25. Kluytmans-van Den Bergh MFQ, Buiting AGM, Pas SD, et al. Prevalence and Clinical Presentation of
- 8 Health Care Workers With Symptoms of Coronavirus Disease 2019 in 2 Dutch Hospitals During an
- 9 Early Phase of the Pandemic. *Jama Network Open*. 2020 May 21;3(5). doi:
- 10 10.1001/jamanetworkopen.2020.9673. PubMed PMID: WOS:000537085500005.
- 11
- 12
- 13
- 14 26. Li Q, Guan X, Wu P, et al. Early Transmission Dynamics in Wuhan, China, of Novel Coronavirus–
- 15 Infected Pneumonia. *New England Journal of Medicine*. 2020;382(13):1199-1207. doi:
- 16 10.1056/NEJMoa2001316.
- 17
- 18
- 19 27. Wang D, Hu B, Hu C, et al. Clinical Characteristics of 138 Hospitalized Patients With 2019 Novel
- 20 Coronavirus–Infected Pneumonia in Wuhan, China. *Jama*. 2020;323(11). doi:
- 21 10.1001/jama.2020.1585.
- 22
- 23
- 24 28. Shamseer L MD, Clarke M. Preferred reporting items for systematic review and meta-analysis
- 25 protocols (PRISMA-P) 2015: elaboration and explanation. *BMJ*. 2015;350:7647. doi: 10.1136. PubMed
- 26 Central PMCID: PMC25555855.
- 27
- 28
- 29
- 30 29. Lizarondo L SC, Carrier J, Godfrey C, Rieger K, Salmond S, Apostolo J, Kirkpatrick P, Loveday H. Chapter
- 31 8: Mixed methods systematic reviews: in *JBI Manual for Evidence Synthesis*. JBI: Aromataris E, Munn Z
- 32 (Editors); 2020. Available from:
- 33 <https://synthesismanual.jbi.global>.<https://doi.org/10.46658/JBIMES-20-09>.
- 34
- 35
- 36
- 37 30. Innovation VH. Covidence systematic review software. Melbourne: Veritas Health Innovation. 2017.
- 38
- 39 31. RH B. On the use of a pilot sample for sample size determination. *Stat Med*. 1995;14:1933–1940.
- 40
- 41 32. Bishop FL, Holmes MM. Mixed Methods in CAM Research: A Systematic Review of Studies Published
- 42 in 2012. *Evid Based Complement Alternat Med*. 2013;2013:187365. doi: 10.1155/2013/187365.
- 43 PubMed PMID: 24454489; PubMed Central PMCID: PMCPMC3881584.
- 44
- 45
- 46 33. Issac H, Moloney C, Taylor M, et al. Mapping of modifiable barriers and facilitators with
- 47 interdisciplinary chronic obstructive pulmonary disease (COPD) guidelines concordance within
- 48 hospitals to the Theoretical Domains Framework: a mixed methods systematic review protocol. *BMJ*
- 49 *Open*. 2020 Jul 20;10(7):e036060. doi: 10.1136/bmjopen-2019-036060. PubMed PMID: 32690740;
- 50 PubMed Central PMCID: PMCPMC7375635.
- 51
- 52
- 53
- 54
- 55
- 56
- 57
- 58
- 59
- 60

- 1  
2  
3  
4  
5  
6  
7  
8  
9  
10  
11  
12  
13  
14  
15  
16  
17  
18  
19  
20  
21  
22  
23  
24  
25  
26  
27  
28  
29  
30  
31  
32  
33  
34  
35  
36  
37  
38  
39  
40  
41  
42  
43  
44  
45  
46  
47  
48  
49  
50  
51  
52  
53  
54  
55  
56  
57  
58  
59  
60
34. Gonzalez-Gonzalez AI SC, Nothacker J. End-of-life care preferences of older patients with multimorbidity: protocol of a mixed-methods systematic review. *BMJ Open*. 2020;10(7):038682. doi: 10.1136. PubMed Central PMCID: PMC32636289.
35. Pluye P, Hong QN. Combining the power of stories and the power of numbers: mixed methods research and mixed studies reviews. *Annu Rev Public Health*. 2014;35:29-45. doi: 10.1146/annurev-publhealth-032013-182440. PubMed PMID: 24188053.
36. Pluye P, Hong QN. Combining the power of stories and the power of numbers: Mixed Methods Research and Mixed Studies Reviews Annual Review of Public Health: Complimentary online access; 2014. Available from: <http://arjournals.annualreviews.org/eprint/qFxpDWrNzjzjwjkgt4V/full/10.1146/annurev-publhealth-032013-182440>.
37. Supporting Document for the Joanna Briggs Institute levels of Evidence and Grades of Recommendation. The Joanna Briggs Institute Levels of Evidence and Grades of Recommendation Working Party. <http://joannabriggs.org/jbi-approach.html#tabbed-nav=Levels-of-Evidence>, 2010.
38. Hutton B C-LF, Moher D. The PRISMA statement extension for systematic reviews incorporating network meta-analysis: PRISMA-NMA. *Med Clin (Barc)*. 2016;147(6):262–266.



Table 1 Searching Terms

| Entries                                                                                                             |                        | Theme                                                   | Search Terms                                                                                                                                                                                                                                                                                                                                                                                                                                                                                                                                                                              |
|---------------------------------------------------------------------------------------------------------------------|------------------------|---------------------------------------------------------|-------------------------------------------------------------------------------------------------------------------------------------------------------------------------------------------------------------------------------------------------------------------------------------------------------------------------------------------------------------------------------------------------------------------------------------------------------------------------------------------------------------------------------------------------------------------------------------------|
| #1                                                                                                                  | participants           | health-care providers                                   | (Healthcare Provider) OR (Healthcare Worker) OR (Health Care Provider) OR (health personnel) OR (health professional) OR (Medical staff) OR (Medical worker) OR (Physician) OR (Clinician) OR (Doctor) OR(Nurse) OR (Nursing Staff) OR (Healthcare employee) OR (Paramedic)                                                                                                                                                                                                                                                                                                               |
| #2                                                                                                                  | Phenomenon of interest | experience and impact                                   | Experience OR perception OR Attitude OR Opinion OR Impact OR Affect OR Emotion OR Mood OR Mental OR (Stress Psychological) OR (Psychological Distress) OR (Affective Symptoms) OR Suffering OR anxiety OR Nervousness OR depression OR insomnia OR (sleep disorder) OR (stress levels) OR infection OR prevalence                                                                                                                                                                                                                                                                         |
| #3                                                                                                                  | Context                | Coronavirus                                             | Coronavirus OR COVID-19 OR SARSCOV2 OR 2019-nCov OR (covid19 Ncov) OR (2019 coronavirus) OR (novel coronavirus) OR (new coronavirus) OR (nouveau coronavirus) OR ( COVID19 ) OR ( 2019-severe acute respiratory syndrome coronavirus 2 ) OR ( SARS-2 ) OR (Wuhan seafood market pneumonia virus) OR (SARS) OR SARS-CoV OR (SARS VIRUS) OR (severe acute respiratory syndrome) OR (MERS) OR (MERS-VIRUS) OR (Middle East Respiratory Syndrome) OR (Middle East respiratory syndrome related coronavirus) OR (MERS-CoV)                                                                     |
| #4                                                                                                                  | Types of studies       | cross-sectional, cohort studies and qualitative studies | (cohort study) OR (Incidence Study) OR (Cohort Analysis) OR (Cohort Analyses) OR (Concurrent Study) OR (Closed Cohort Study) OR (Historical Cohort Study) OR (Prevalence Study) OR (Disease Frequency Survey) OR (Cross-Sectional) OR (Cross Sectional) OR (Empirical Research) OR (qualitative study) OR (qualitative Research) OR (Qualitative description) OR (phenomenological study) OR (Grounded Theory) OR (ethnography) OR ( Anthropology) OR (Behavioral Research) OR (action research) OR (mixed method) OR (mixed-method) OR (Investigative research) OR (Investigative study) |
| Number of articles #1=2217945, #2=10163250, #3=68640, #4=6261727, #1 AND #2 AND #3 AND #4=2038 (31July 2020-PubMed) |                        |                                                         |                                                                                                                                                                                                                                                                                                                                                                                                                                                                                                                                                                                           |

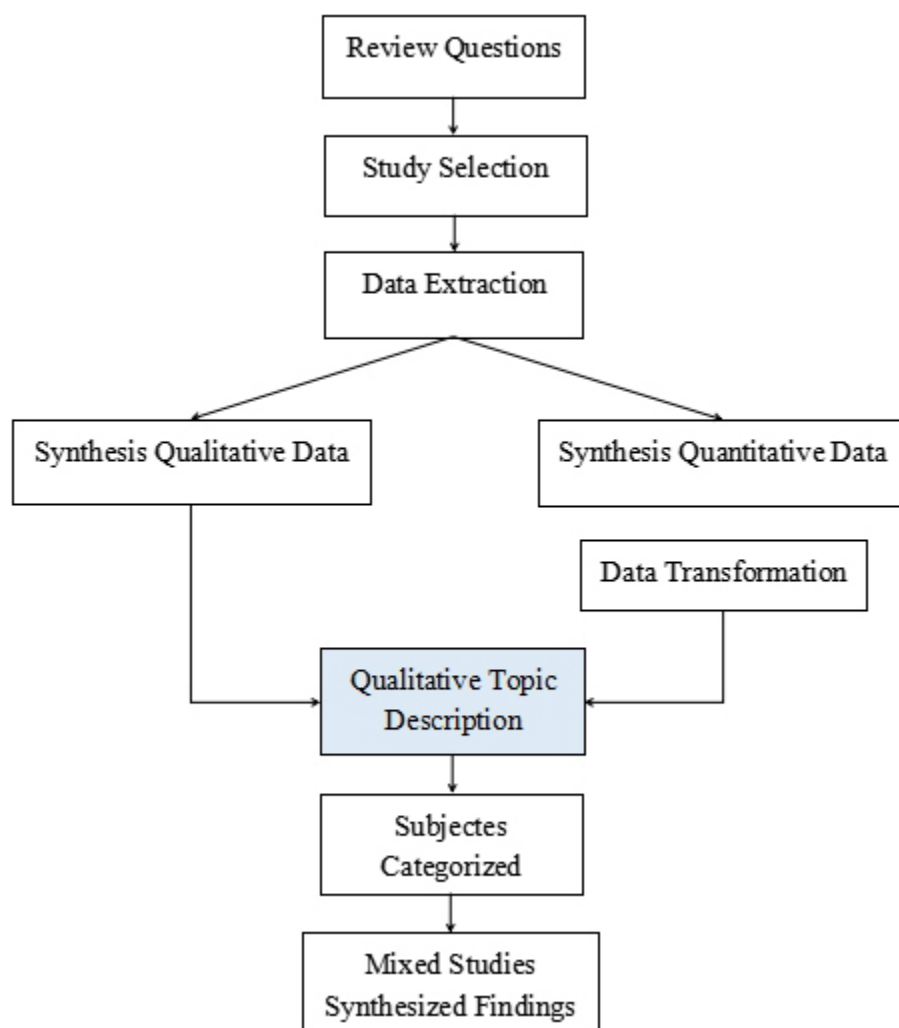

Figure 1. The design process of Systematic review

38x43mm (300 x 300 DPI)

1  
2  
3  
4  
5  
6  
7  
8  
9  
10  
11  
12  
13  
14  
15  
16  
17  
18  
19  
20  
21  
22  
23  
24  
25  
26  
27  
28  
29  
30  
31  
32  
33  
34  
35  
36  
37  
38  
39  
40  
41  
42  
43  
44  
45  
46  
47  
48  
49  
50  
51  
52  
53  
54  
55  
56  
57  
58  
59  
60

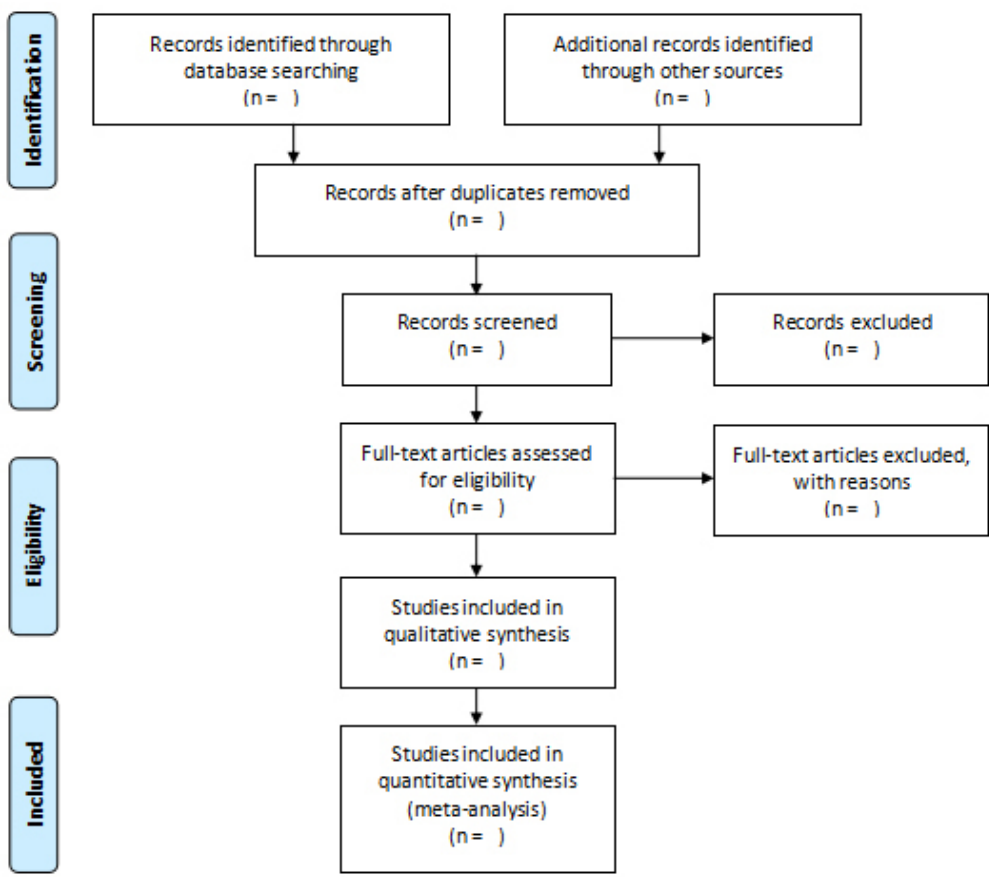

Figure 2. Flow chart diagram will be showed the selection of articles for systemic review.

44x39mm (300 x 300 DPI)

# MIXED METHODS APPRAISAL TOOL (MMAT)

## VERSION 2018

### User guide

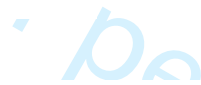

Prepared by

Quan Nha HONG<sup>a</sup>, Pierre PLUYE<sup>a</sup>, Sergi FÀBREGUES<sup>b</sup>, Gillian BARTLETT<sup>a</sup>, Felicity BOARDMAN<sup>c</sup>,  
Margaret CARGO<sup>d</sup>, Pierre DAGENAIS<sup>e</sup>, Marie-Pierre GAGNON<sup>f</sup>, Frances GRIFFITHS<sup>c</sup>, Belinda NICOLAU<sup>a</sup>,  
Alicia O’CATHAIN<sup>g</sup>, Marie-Claude ROUSSEAU<sup>h</sup>, & Isabelle VEDEL<sup>a</sup>

<sup>a</sup>McGill University, Montréal, Canada; <sup>b</sup>Universitat Oberta de Catalunya, Barcelona, Spain; <sup>c</sup>University of Warwick, Coventry, England;  
<sup>d</sup>University of Canberra, Canberra, Australia; <sup>e</sup>Université de Sherbrooke, Sherbrooke, Canada; <sup>f</sup>Université Laval, Québec, Canada;  
<sup>g</sup>University of Sheffield, Sheffield, England; <sup>h</sup>Institut Armand-Frappier Research Centre, Laval, Canada

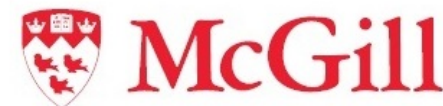

Department of Family Medicine | Département de médecine de famille  
Academic excellence and innovation in care, teaching and research  
Innovation et excellence académique dans les soins, l'enseignement et la recherche

## What is the MMAT?

The MMAT is a critical appraisal tool that is designed for the appraisal stage of systematic mixed studies reviews, i.e., reviews that include qualitative, quantitative and mixed methods studies. It permits to appraise the methodological quality of five categories to studies: qualitative research, randomized controlled trials, non-randomized studies, quantitative descriptive studies, and mixed methods studies.

## How was the MMAT developed?

The MMAT was developed in 2006 (Pluye et al., 2009a) and was revised in 2011 (Pace et al., 2012). The present version 2018 was developed on the basis of findings from a literature review of critical appraisal tools, interviews with MMAT users, and an e-Delphi study with international experts (Hong, 2018). The MMAT developers are continuously seeking for improvement and testing of this tool. Users' feedback is always appreciated.

## What the MMAT can be used for?

The MMAT can be used to appraise the quality of empirical studies, i.e., primary research based on experiment, observation or simulation (Abbott, 1998; Porta et al., 2014). It cannot be used for non-empirical papers such as review and theoretical papers. Also, the MMAT allows the appraisal of most common types of study methodologies and designs. However, some specific designs such as economic and diagnostic accuracy studies cannot be assessed with the MMAT. Other critical appraisal tools might be relevant for these designs.

## What are the requirements?

Because critical appraisal is about judgment making, it is advised to have at least two reviewers independently involved in the appraisal process. Also, using the MMAT requires experience or training in these domains. For instance, MMAT users may be helped by a colleague with specific expertise when needed.

## How to use the MMAT?

This document comprises two parts: checklist (Part I) and explanation of the criteria (Part II).

1. Respond to the two screening questions. Responding 'No' or 'Can't tell' to one or both questions might indicate that the paper is not an empirical study, and thus cannot be appraised using the MMAT. MMAT users might decide not to use these questions, especially if the selection criteria of their review are limited to empirical studies.
2. For each included study, choose the appropriate category of studies to appraise. Look at the description of the methods used in the included studies. If needed, use the algorithm at the end of this document.
3. Rate the criteria of the chosen category. For example, if the paper is a qualitative study, only rate the five criteria in the qualitative category. The 'Can't tell' response category means that the paper do not report appropriate information to answer 'Yes' or 'No', or that report unclear information related to the criterion. Rating 'Can't tell' could lead to look for companion papers, or contact authors to ask more information or clarification when needed. In Part II of this document, indicators are added for some criteria. The list is not exhaustive and not all indicators are necessary. You should agree among your team which ones are important to consider for your field and apply them uniformly across all included studies from the same category.

## How to score?

It is discouraged to calculate an overall score from the ratings of each criterion. Instead, it is advised to provide a more detailed presentation of the ratings of each criterion to better inform the quality of the included studies. This may lead to perform a sensitivity analysis (i.e., to consider the quality of studies by contrasting their results). Excluding studies with low methodological quality is usually discouraged.

## How to cite this document?

Hong QN, Pluye P, Fàbregues S, Bartlett G, Boardman F, Cargo M, Dagenais P, Gagnon M-P, Griffiths F, Nicolau B, O'Cathain A, Rousseau M-C, Vedel I. Mixed Methods Appraisal Tool (MMAT), version 2018. Registration of Copyright (#1148552), Canadian Intellectual Property Office, Industry Canada.

For dissemination, application, and feedback: Please contact [mixed.methods.appraisal.tool@gmail.com](mailto:mixed.methods.appraisal.tool@gmail.com)

For more information: <http://mixedmethodsappraisaltoolpublic.pbworks.com/>

For peer review only - <http://bmjopen.bmj.com/site/about/guidelines.xhtml>

**Part I: Mixed Methods Appraisal Tool (MMAT), version 2018**

| Category of study designs                          | Methodological quality criteria                                                                                                         | Responses |    |            |          |
|----------------------------------------------------|-----------------------------------------------------------------------------------------------------------------------------------------|-----------|----|------------|----------|
|                                                    |                                                                                                                                         | Yes       | No | Can't tell | Comments |
| Screening questions<br>(for all types)             | S1. Are there clear research questions?                                                                                                 |           |    |            |          |
|                                                    | S2. Do the collected data allow to address the research questions?                                                                      |           |    |            |          |
|                                                    | <i>Further appraisal may not be feasible or appropriate when the answer is 'No' or 'Can't tell' to one or both screening questions.</i> |           |    |            |          |
| 1. Qualitative                                     | 1.1. Is the qualitative approach appropriate to answer the research question?                                                           |           |    |            |          |
|                                                    | 1.2. Are the qualitative data collection methods adequate to address the research question?                                             |           |    |            |          |
|                                                    | 1.3. Are the findings adequately derived from the data?                                                                                 |           |    |            |          |
|                                                    | 1.4. Is the interpretation of results sufficiently substantiated by data?                                                               |           |    |            |          |
|                                                    | 1.5. Is there coherence between qualitative data sources, collection, analysis and interpretation?                                      |           |    |            |          |
| 2. Quantitative<br>randomized controlled<br>trials | 2.1. Is randomization appropriately performed?                                                                                          |           |    |            |          |
|                                                    | 2.2. Are the groups comparable at baseline?                                                                                             |           |    |            |          |
|                                                    | 2.3. Are there complete outcome data?                                                                                                   |           |    |            |          |
|                                                    | 2.4. Are outcome assessors blinded to the intervention provided?                                                                        |           |    |            |          |
|                                                    | 2.5. Did the participants adhere to the assigned intervention?                                                                          |           |    |            |          |
| 3. Quantitative non-<br>randomized                 | 3.1. Are the participants representative of the target population?                                                                      |           |    |            |          |
|                                                    | 3.2. Are measurements appropriate regarding both the outcome and intervention (or exposure)?                                            |           |    |            |          |
|                                                    | 3.3. Are there complete outcome data?                                                                                                   |           |    |            |          |
|                                                    | 3.4. Are the confounders accounted for in the design and analysis?                                                                      |           |    |            |          |
|                                                    | 3.5. During the study period, is the intervention administered (or exposure occurred) as intended?                                      |           |    |            |          |
| 4. Quantitative<br>descriptive                     | 4.1. Is the sampling strategy relevant to address the research question?                                                                |           |    |            |          |
|                                                    | 4.2. Is the sample representative of the target population?                                                                             |           |    |            |          |
|                                                    | 4.3. Are the measurements appropriate?                                                                                                  |           |    |            |          |
|                                                    | 4.4. Is the risk of nonresponse bias low?                                                                                               |           |    |            |          |
|                                                    | 4.5. Is the statistical analysis appropriate to answer the research question?                                                           |           |    |            |          |
| 5. Mixed methods                                   | 5.1. Is there an adequate rationale for using a mixed methods design to address the research question?                                  |           |    |            |          |
|                                                    | 5.2. Are the different components of the study effectively integrated to answer the research question?                                  |           |    |            |          |
|                                                    | 5.3. Are the outputs of the integration of qualitative and quantitative components adequately interpreted?                              |           |    |            |          |
|                                                    | 5.4. Are divergences and inconsistencies between quantitative and qualitative results adequately addressed?                             |           |    |            |          |
|                                                    | 5.5. Do the different components of the study adhere to the quality criteria of each tradition of the methods involved?                 |           |    |            |          |

## Part II: Explanations

| 1. Qualitative studies                                                                                                                                                                                                                                                                                                                                                                                                                                                                            | Methodological quality criteria                                                                                                                                                                                                                                                                                                                                                                                                                                                                                                                                                                                                                                                                                     |
|---------------------------------------------------------------------------------------------------------------------------------------------------------------------------------------------------------------------------------------------------------------------------------------------------------------------------------------------------------------------------------------------------------------------------------------------------------------------------------------------------|---------------------------------------------------------------------------------------------------------------------------------------------------------------------------------------------------------------------------------------------------------------------------------------------------------------------------------------------------------------------------------------------------------------------------------------------------------------------------------------------------------------------------------------------------------------------------------------------------------------------------------------------------------------------------------------------------------------------|
| <p data-bbox="120 261 1034 365">“Qualitative research is an approach for exploring and understanding the meaning individuals or groups ascribe to a social or human problem” (Creswell, 2013b, p. 3).</p> <p data-bbox="120 397 1034 462">Common qualitative research approaches include (this list if not exhaustive):</p> <p data-bbox="120 495 1034 560"><b>Ethnography</b><br/>The aim of the study is to describe and interpret the shared cultural behaviour of a group of individuals.</p> | <p data-bbox="1034 261 2564 300">1.1. Is the qualitative approach appropriate to answer the research question?</p> <p data-bbox="1034 332 2564 462">Explanations<br/>The qualitative approach used in a study (see non-exhaustive list on the left side of this table) should be appropriate for the research question and problem. For example, the use of a grounded theory approach should address the development of a theory and ethnography should study human cultures and societies.</p> <p data-bbox="1034 495 2564 560">This criterion was considered important to add in the MMAT since there is only one category of criteria for qualitative studies (compared to three for quantitative studies).</p> |
| <p data-bbox="120 633 1034 730"><b>Phenomenology</b><br/>The study focuses on the subjective experiences and interpretations of a phenomenon encountered by individuals.</p> <p data-bbox="120 763 1034 828"><b>Narrative research</b><br/>The study analyzes life experiences of an individual or a group.</p>                                                                                                                                                                                   | <p data-bbox="1034 565 2564 604">1.2. Are the qualitative data collection methods adequate to address the research question?</p> <p data-bbox="1034 636 2564 795">Explanations<br/>This criterion is related to data collection method, including data sources (e.g., archives, documents), used to address the research question. To judge this criterion, consider whether the method of data collection (e.g., in depth interviews and/or group interviews, and/or observations) and the form of the data (e.g., tape recording, video material, diary, photo, and/or field notes) are adequate. Also, clear justifications are needed when data collection methods are modified during the study.</p>           |
| <p data-bbox="120 868 1034 966"><b>Grounded theory</b><br/>Generation of theory from data in the process of conducting research (data collection occurs first).</p>                                                                                                                                                                                                                                                                                                                               | <p data-bbox="1034 803 2564 842">1.3. Are the findings adequately derived from the data?</p> <p data-bbox="1034 875 2564 1005">Explanations<br/>This criterion is related to the data analysis used. Several data analysis methods have been developed and their use depends on the research question and qualitative approach. For example, open, axial and selective coding is often associated with grounded theory, and within- and cross-case analysis is often seen in case study.</p>                                                                                                                                                                                                                        |
| <p data-bbox="120 1015 1034 1136"><b>Case study</b><br/>In-depth exploration and/or explanation of issues intrinsic to a particular case. A case can be anything from a decision-making process, to a person, an organization, or a country.</p>                                                                                                                                                                                                                                                  | <p data-bbox="1034 1015 2564 1053">1.4. Is the interpretation of results sufficiently substantiated by data?</p> <p data-bbox="1034 1086 2564 1177">Explanations<br/>The interpretation of results should be supported by the data collected. For example, the quotes provided to justify the themes should be adequate.</p>                                                                                                                                                                                                                                                                                                                                                                                        |
| <p data-bbox="120 1177 1034 1307"><b>Qualitative description</b><br/>There is no specific methodology, but a qualitative data collection and analysis, e.g., in-depth interviews or focus groups, and hybrid thematic analysis (inductive and deductive).</p> <p data-bbox="120 1339 1034 1367">Key references: Creswell (2013a); Sandelowski (2010); Schwandt (2015)</p>                                                                                                                         | <p data-bbox="1034 1177 2564 1216">1.5. Is there coherence between qualitative data sources, collection, analysis and interpretation?</p> <p data-bbox="1034 1248 2564 1315">Explanations<br/>There should be clear links between data sources, collection, analysis and interpretation.</p>                                                                                                                                                                                                                                                                                                                                                                                                                        |

| 2. Quantitative randomized controlled trials                                                                                                                                                                                                                                                                                                                 | Methodological quality criteria                                                                                                                                                                                                                                                                                                                                                                                                                                                                                                                                                                                                                                                                                                                                                                                                                                                                                                                                                                                                                                                                                                                                                                                                                                                                                                                                                                                                                                                                                                                                                                                                                                                                             |
|--------------------------------------------------------------------------------------------------------------------------------------------------------------------------------------------------------------------------------------------------------------------------------------------------------------------------------------------------------------|-------------------------------------------------------------------------------------------------------------------------------------------------------------------------------------------------------------------------------------------------------------------------------------------------------------------------------------------------------------------------------------------------------------------------------------------------------------------------------------------------------------------------------------------------------------------------------------------------------------------------------------------------------------------------------------------------------------------------------------------------------------------------------------------------------------------------------------------------------------------------------------------------------------------------------------------------------------------------------------------------------------------------------------------------------------------------------------------------------------------------------------------------------------------------------------------------------------------------------------------------------------------------------------------------------------------------------------------------------------------------------------------------------------------------------------------------------------------------------------------------------------------------------------------------------------------------------------------------------------------------------------------------------------------------------------------------------------|
| <p><b>Randomized controlled clinical trial:</b> A clinical study in which individual participants are allocated to intervention or control groups by randomization (intervention assigned by researchers).</p> <p>Key references: Higgins and Green (2008); Higgins et al. (2016); Oxford Centre for Evidence-based Medicine (2016); Porta et al. (2014)</p> | <p>2.1. Is randomization appropriately performed?</p> <p>Explanations<br/>In a randomized controlled trial, the allocation of a participant (or a data collection unit, e.g., a school) into the intervention or control group is based solely on chance. Researchers should describe how the randomization schedule was generated. A simple statement such as ‘we randomly allocated’ or ‘using a randomized design’ is insufficient to judge if randomization was appropriately performed. Also, assignment that is predictable such as using odd and even record numbers or dates is not appropriate. At minimum, a simple allocation (or unrestricted allocation) should be performed by following a predetermined plan/sequence. It is usually achieved by referring to a published list of random numbers, or to a list of random assignments generated by a computer. Also, restricted allocation can be performed such as blocked randomization (to ensure particular allocation ratios to the intervention groups), stratified randomization (randomization performed separately within strata), or minimization (to make small groups closely similar with respect to several characteristics). Another important characteristic to judge if randomization was appropriately performed is allocation concealment that protects assignment sequence until allocation. Researchers and participants should be unaware of the assignment sequence up to the point of allocation. Several strategies can be used to ensure allocation concealment such relying on a central randomization by a third party, or the use of sequentially numbered, opaque, sealed envelopes (Higgins et al., 2016).</p> |
|                                                                                                                                                                                                                                                                                                                                                              | <p>2.2. Are the groups comparable at baseline?</p> <p>Explanations<br/>Baseline imbalance between groups suggests that there are problems with the randomization. Indicators from baseline imbalance include: “(1) unusually large differences between intervention group sizes; (2) a substantial excess in statistically significant differences in baseline characteristics than would be expected by chance alone; (3) imbalance in key prognostic factors (or baseline measures of outcome variables) that are unlikely to be due to chance; (4) excessive similarity in baseline characteristics that is not compatible with chance; (5) surprising absence of one or more key characteristics that would be expected to be reported” (Higgins et al., 2016, p. 10).</p>                                                                                                                                                                                                                                                                                                                                                                                                                                                                                                                                                                                                                                                                                                                                                                                                                                                                                                                              |
|                                                                                                                                                                                                                                                                                                                                                              | <p>2.3. Are there complete outcome data?</p> <p>Explanations<br/>Almost all the participants contributed to almost all measures. There is no absolute and standard cut-off value for acceptable complete outcome data. Agree among your team what is considered complete outcome data in your field and apply this uniformly across all the included studies. For instance, in the literature, acceptable complete data value ranged from 80% (Thomas et al., 2004; Zaza et al., 2000) to 95% (Higgins et al., 2016). Similarly, different acceptable withdrawal/dropouts rates have been suggested: 5% (de Vet et al., 1997; MacLehose et al., 2000), 20% (Sindhu et al., 1997; Van Tulder et al., 2003) and 30% for a follow-up of more than one year (Viswanathan and Berkman, 2012).</p>                                                                                                                                                                                                                                                                                                                                                                                                                                                                                                                                                                                                                                                                                                                                                                                                                                                                                                                |
|                                                                                                                                                                                                                                                                                                                                                              | <p>2.4. Are outcome assessors blinded to the intervention provided?</p> <p>Explanations<br/>Outcome assessors should be unaware of who is receiving which interventions. The assessors can be the participants if using participant reported outcome (e.g., pain), the intervention provider (e.g., clinical exam), or other persons not involved in the intervention (Higgins et al., 2016).</p>                                                                                                                                                                                                                                                                                                                                                                                                                                                                                                                                                                                                                                                                                                                                                                                                                                                                                                                                                                                                                                                                                                                                                                                                                                                                                                           |
|                                                                                                                                                                                                                                                                                                                                                              | <p>2.5 Did the participants adhere to the assigned intervention?</p> <p>Explanations<br/>To judge this criterion, consider the proportion of participants who continued with their assigned intervention throughout follow-up. “Lack of adherence includes imperfect compliance, cessation of intervention, crossovers to the comparator intervention and switches to another active intervention.” (Higgins et al., 2016, p. 25).</p>                                                                                                                                                                                                                                                                                                                                                                                                                                                                                                                                                                                                                                                                                                                                                                                                                                                                                                                                                                                                                                                                                                                                                                                                                                                                      |



| 3. Quantitative non-randomized studies                                                                                                                                                                                                                                                                                                                                                                                                                                                                                          | Methodological quality criteria                                                                                                                                                                                                                                                                                                                                                                                                                                                                                                                                                                                                                                                                                                                                                                                                                         |
|---------------------------------------------------------------------------------------------------------------------------------------------------------------------------------------------------------------------------------------------------------------------------------------------------------------------------------------------------------------------------------------------------------------------------------------------------------------------------------------------------------------------------------|---------------------------------------------------------------------------------------------------------------------------------------------------------------------------------------------------------------------------------------------------------------------------------------------------------------------------------------------------------------------------------------------------------------------------------------------------------------------------------------------------------------------------------------------------------------------------------------------------------------------------------------------------------------------------------------------------------------------------------------------------------------------------------------------------------------------------------------------------------|
| <p>Non-randomized studies are defined as any quantitative studies estimating the effectiveness of an intervention or studying other exposures that do not use randomization to allocate units to comparison groups (Higgins and Green, 2008).</p>                                                                                                                                                                                                                                                                               | <p>3.1. Are the participants representative of the target population?</p> <p>Explanations<br/>Indicators of representativeness include: clear description of the target population and of the sample (inclusion and exclusion criteria), reasons why certain eligible individuals chose not to participate, and any attempts to achieve a sample of participants that represents the target population.</p>                                                                                                                                                                                                                                                                                                                                                                                                                                             |
| <p>Common designs include (this list if not exhaustive):</p> <p><b>Non-randomized controlled trials</b><br/>The intervention is assigned by researchers, but there is no randomization, e.g., a pseudo-randomization. A non-random method of allocation is not reliable in producing alone similar groups.</p>                                                                                                                                                                                                                  | <p>3.2. Are measurements appropriate regarding both the outcome and intervention (or exposure)?</p> <p>Explanations<br/>Indicators of appropriate measurements include: the variables are clearly defined and accurately measured; the measurements are justified and appropriate for answering the research question; the measurements reflect what they are supposed to measure; validated and reliability tested measures of the intervention/exposure and outcome of interest are used, or variables are measured using 'gold standard'.</p>                                                                                                                                                                                                                                                                                                        |
| <p><b>Cohort study</b><br/>Subsets of a defined population are assessed as exposed, not exposed, or exposed at different degrees to factors of interest. Participants are followed over time to determine if an outcome occurs (prospective longitudinal).</p> <p><b>Case-control study</b><br/>Cases, e.g., patients, associated with a certain outcome are selected, alongside a corresponding group of controls. Data is collected on whether cases and controls were exposed to the factor under study (retrospective).</p> | <p>3.3. Are there complete outcome data?</p> <p>Explanations<br/>Almost all the participants contributed to almost all measures. There is no absolute and standard cut-off value for acceptable complete outcome data. Agree among your team what is considered complete outcome data in your field (and based on the targeted journal) and apply this uniformly across all the included studies. For example, in the literature, acceptable complete data value ranged from 80% (Thomas et al., 2004; Zaza et al., 2000) to 95% (Higgins et al., 2016). Similarly, different acceptable withdrawal/dropouts rates have been suggested: 5% (de Vet et al., 1997; MacLehose et al., 2000), 20% (Sindhu et al., 1997; Van Tulder et al., 2003) and 30% for follow-up of more than one year (Viswanathan and Berkman, 2012).</p>                           |
| <p><b>Cross-sectional analytic study</b><br/>At one particular time, the relationship between health-related characteristics (outcome) and other factors (intervention/exposure) is examined. E.g., the frequency of outcomes is compared in different population subgroups according to the presence/absence (or level) of the intervention/exposure.</p>                                                                                                                                                                      | <p>3.4. Are the confounders accounted for in the design and analysis?</p> <p>Explanations<br/>Confounders are factors that predict both the outcome of interest and the intervention received/exposure at baseline. They can distort the interpretation of findings and need to be considered in the design and analysis of a non-randomized study. Confounding bias is low if there is no confounding expected, or appropriate methods to control for confounders are used (such as stratification, regression, matching, standardization, and inverse probability weighting).</p>                                                                                                                                                                                                                                                                     |
| <p>Key references for non-randomized studies: Higgins and Green (2008); Porta et al. (2014); Sterne et al. (2016); Wells et al. (2000)</p>                                                                                                                                                                                                                                                                                                                                                                                      | <p>3.5. During the study period, is the intervention administered (or exposure occurred) as intended?</p> <p>Explanations<br/>For intervention studies, consider whether the participants were treated in a way that is consistent with the planned intervention. Since the intervention is assigned by researchers, consider whether there was a presence of contamination (e.g., the control group may be indirectly exposed to the intervention) or whether unplanned co-interventions were present in one group (Sterne et al., 2016).</p> <p>For observational studies, consider whether changes occurred in the exposure status among the participants. If yes, check if these changes are likely to influence the outcome of interest, were adjusted for, or whether unplanned co-exposures were present in one group (Morgan et al., 2017).</p> |

| 4. Quantitative descriptive studies                                                                                                                                                                                                                                                                                                          | Methodological quality criteria                                                                                                                                                                                                                                                                                                                                                                                                                                                                                                                                                                                                                                                                                                                                                                                                                                                                                      |
|----------------------------------------------------------------------------------------------------------------------------------------------------------------------------------------------------------------------------------------------------------------------------------------------------------------------------------------------|----------------------------------------------------------------------------------------------------------------------------------------------------------------------------------------------------------------------------------------------------------------------------------------------------------------------------------------------------------------------------------------------------------------------------------------------------------------------------------------------------------------------------------------------------------------------------------------------------------------------------------------------------------------------------------------------------------------------------------------------------------------------------------------------------------------------------------------------------------------------------------------------------------------------|
| <p>Quantitative descriptive studies are “concerned with and designed only to describe the existing distribution of variables without much regard to causal relationships or other hypotheses” (Porta et al., 2014, p. 72). They are used to monitoring the population, planning, and generating hypothesis (Grimes and Schulz, 2002).</p>    | <p>4.1. Is the sampling strategy relevant to address the research question?</p> <p>Explanations<br/>Sampling strategy refers to the way the sample was selected. There are two main categories of sampling strategies: probability sampling (involve random selection) and non-probability sampling. Depending on the research question, probability sampling might be preferable. Non-probability sampling does not provide equal chance of being selected. To judge this criterion, consider whether the source of sample is relevant to the target population; a clear justification of the sample frame used is provided; or the sampling procedure is adequate.</p>                                                                                                                                                                                                                                             |
| <p>Common designs include the following single-group studies (this list if not exhaustive):</p> <p><b>Incidence or prevalence study without comparison group</b><br/>In a defined population at one particular time, what is happening in a population, e.g., frequencies of factors (importance of problems), is described (portrayed).</p> | <p>4.2. Is the sample representative of the target population?</p> <p>Explanations<br/>There should be a match between respondents and the target population. Indicators of representativeness include: clear description of the target population and of the sample (such as respective sizes and inclusion and exclusion criteria), reasons why certain eligible individuals chose not to participate, and any attempts to achieve a sample of participants that represents the target population.</p>                                                                                                                                                                                                                                                                                                                                                                                                             |
| <p><b>Survey</b><br/>“Research method by which information is gathered by asking people questions on a specific topic and the data collection procedure is standardized and well defined.” (Bennett et al., 2011, p. 3).</p>                                                                                                                 | <p>4.3. Are the measurements appropriate?</p> <p>Explanations<br/>Indicators of appropriate measurements include: the variables are clearly defined and accurately measured, the measurements are justified and appropriate for answering the research question; the measurements reflect what they are supposed to measure; validated and reliability tested measures of the outcome of interest are used, variables are measured using ‘gold standard’, or questionnaires are pre-tested prior to data collection.</p>                                                                                                                                                                                                                                                                                                                                                                                             |
| <p><b>Case series</b><br/>A collection of individuals with similar characteristics are used to describe an outcome.</p> <p><b>Case report</b><br/>An individual or a group with a unique/unusual outcome is described in detail.</p> <p>Key references: Critical Appraisal Skills Programme (2017); Draugalis et al. (2008)</p>              | <p>4.4. Is the risk of nonresponse bias low?</p> <p>Explanations<br/>Nonresponse bias consists of “an error of nonobservation reflecting an unsuccessful attempt to obtain the desired information from an eligible unit.” (Federal Committee on Statistical Methodology, 2001, p. 6). To judge this criterion, consider whether the respondents and non-respondents are different on the variable of interest. This information might not always be reported in a paper. Some indicators of low nonresponse bias can be considered such as a low nonresponse rate, reasons for nonresponse (e.g., noncontacts vs. refusals), and statistical compensation for nonresponse (e.g., imputation).</p> <p>The nonresponse bias is might not be pertinent for case series and case report. This criterion could be adapted. For instance, complete data on the cases might be important to consider in these designs.</p> |
|                                                                                                                                                                                                                                                                                                                                              | <p>4.5. Is the statistical analysis appropriate to answer the research question?</p> <p>Explanations<br/>The statistical analyses used should be clearly stated and justified in order to judge if they are appropriate for the design and research question, and if any problems with data analysis limited the interpretation of the results.</p>                                                                                                                                                                                                                                                                                                                                                                                                                                                                                                                                                                  |

| 5. Mixed methods studies                                                                                                                                                                                                                                                                                                                                                                                                                                                                                                                                                                                                          | Methodological quality criteria                                                                                                                                                                                                                                                                                                                                                                                                                                                                                                                                                                                                                                                                                                                                                                                                                                                                                              |
|-----------------------------------------------------------------------------------------------------------------------------------------------------------------------------------------------------------------------------------------------------------------------------------------------------------------------------------------------------------------------------------------------------------------------------------------------------------------------------------------------------------------------------------------------------------------------------------------------------------------------------------|------------------------------------------------------------------------------------------------------------------------------------------------------------------------------------------------------------------------------------------------------------------------------------------------------------------------------------------------------------------------------------------------------------------------------------------------------------------------------------------------------------------------------------------------------------------------------------------------------------------------------------------------------------------------------------------------------------------------------------------------------------------------------------------------------------------------------------------------------------------------------------------------------------------------------|
| <p>Mixed methods (MM) research involves combining qualitative (QUAL) and quantitative (QUAN) methods. In this tool, to be considered MM, studies have to meet the following criteria (Creswell and Plano Clark, 2017): (a) at least one QUAL method and one QUAN method are combined; (b) each method is used rigorously in accordance to the generally accepted criteria in the area (or tradition) of research invoked; and (c) the combination of the methods is carried out at the minimum through a MM design (defined <i>a priori</i>, or emerging) and the integration of the QUAL and QUAN phases, results, and data.</p> | <p>5.1. Is there an adequate rationale for using a mixed methods design to address the research question?</p> <p>Explanations<br/>The reasons for conducting a mixed methods study should be clearly explained. Several reasons can be invoked such as to enhance or build upon qualitative findings with quantitative results and vice versa; to provide a comprehensive and complete understanding of a phenomenon or to develop and test instruments (Bryman, 2006).</p>                                                                                                                                                                                                                                                                                                                                                                                                                                                  |
| <p>Common designs include (this list is not exhaustive):</p> <p><b>Convergent design</b><br/>The QUAL and QUAN components are usually (but not necessarily) concomitant. The purpose is to examine the same phenomenon by interpreting QUAL and QUAN results (bringing data analysis together at the interpretation stage), or by integrating QUAL and QUAN datasets (e.g., data on same cases), or by transforming data (e.g., quantization of qualitative data).</p>                                                                                                                                                            | <p>5.2. Are the different components of the study effectively integrated to answer the research question?</p> <p>Explanations<br/>Integration is a core component of mixed methods research and is defined as the “explicit interrelating of the quantitative and qualitative component in a mixed methods study” (Plano Clark and Ivankova, 2015, p. 40). Look for information on how qualitative and quantitative phases, results, and data were integrated (Pluye et al., 2018). For instance, how data gathered by both research methods was brought together to form a complete picture (e.g., joint displays) and when integration occurred (e.g., during the data collection-analysis or/and during the interpretation of qualitative and quantitative results).</p>                                                                                                                                                  |
| <p><b>Sequential explanatory design</b><br/>Results of the phase 1 - QUAN component inform the phase 2 - QUAL component. The purpose is to explain QUAN results using QUAL findings. E.g., the QUAN results guide the selection of QUAL data sources and data collection, and the QUAL findings contribute to the interpretation of QUAN results.</p>                                                                                                                                                                                                                                                                             | <p>5.3. Are the outputs of the integration of qualitative and quantitative components adequately interpreted?</p> <p>Explanations<br/>This criterion is related to meta-inference, which is defined as the overall interpretations derived from integrating qualitative and quantitative findings (Teddlie and Tashakkori, 2009). Meta-inference occurs during the interpretation of the findings from the integration of the qualitative and quantitative components, and shows the added value of conducting a mixed methods study rather than having two separate studies.</p>                                                                                                                                                                                                                                                                                                                                            |
| <p><b>Sequential exploratory design</b><br/>Results of the phase 1 - QUAL component inform the phase 2 - QUAN component. The purpose is to explore, develop and test an instrument (or taxonomy), or a conceptual framework (or theoretical model). E.g., the QUAL findings inform the QUAN data collection, and the QUAN results allow a statistical generalization of the QUAL findings.</p>                                                                                                                                                                                                                                    | <p>5.4. Are divergences and inconsistencies between quantitative and qualitative results adequately addressed?</p> <p>Explanations<br/>When integrating the findings from the qualitative and quantitative components, divergences and inconsistencies (also called conflicts, contradictions, discordances, discrepancies, and dissonances) can be found. It is not sufficient to only report the divergences; they need to be explained. Different strategies to address the divergences have been suggested such as reconciliation, initiation, bracketing and exclusion (Pluye et al., 2009b). Rate this criterion ‘Yes’ if there is no divergence.</p>                                                                                                                                                                                                                                                                  |
| <p>Key references: Creswell et al. (2011); Creswell and Plano Clark, (2017); O’Cathain (2010)</p>                                                                                                                                                                                                                                                                                                                                                                                                                                                                                                                                 | <p>5.5. Do the different components of the study adhere to the quality criteria of each tradition of the methods involved?</p> <p>Explanations<br/>The quality of the qualitative and quantitative components should be individually appraised to ensure that no important threats to trustworthiness are present. To appraise 5.5, use criteria for the qualitative component (1.1 to 1.5), and the appropriate criteria for the quantitative component (2.1 to 2.5, or 3.1 to 3.5, or 4.1 to 4.5). The quality of both components should be high for the mixed methods study to be considered of good quality. The premise is that the overall quality of a mixed methods study cannot exceed the quality of its weakest component. For example, if the quantitative component is rated high quality and the qualitative component is rated low quality, the overall rating for this criterion will be of low quality.</p> |

Algorithm for selecting the study categories to rate in the MMAT\*

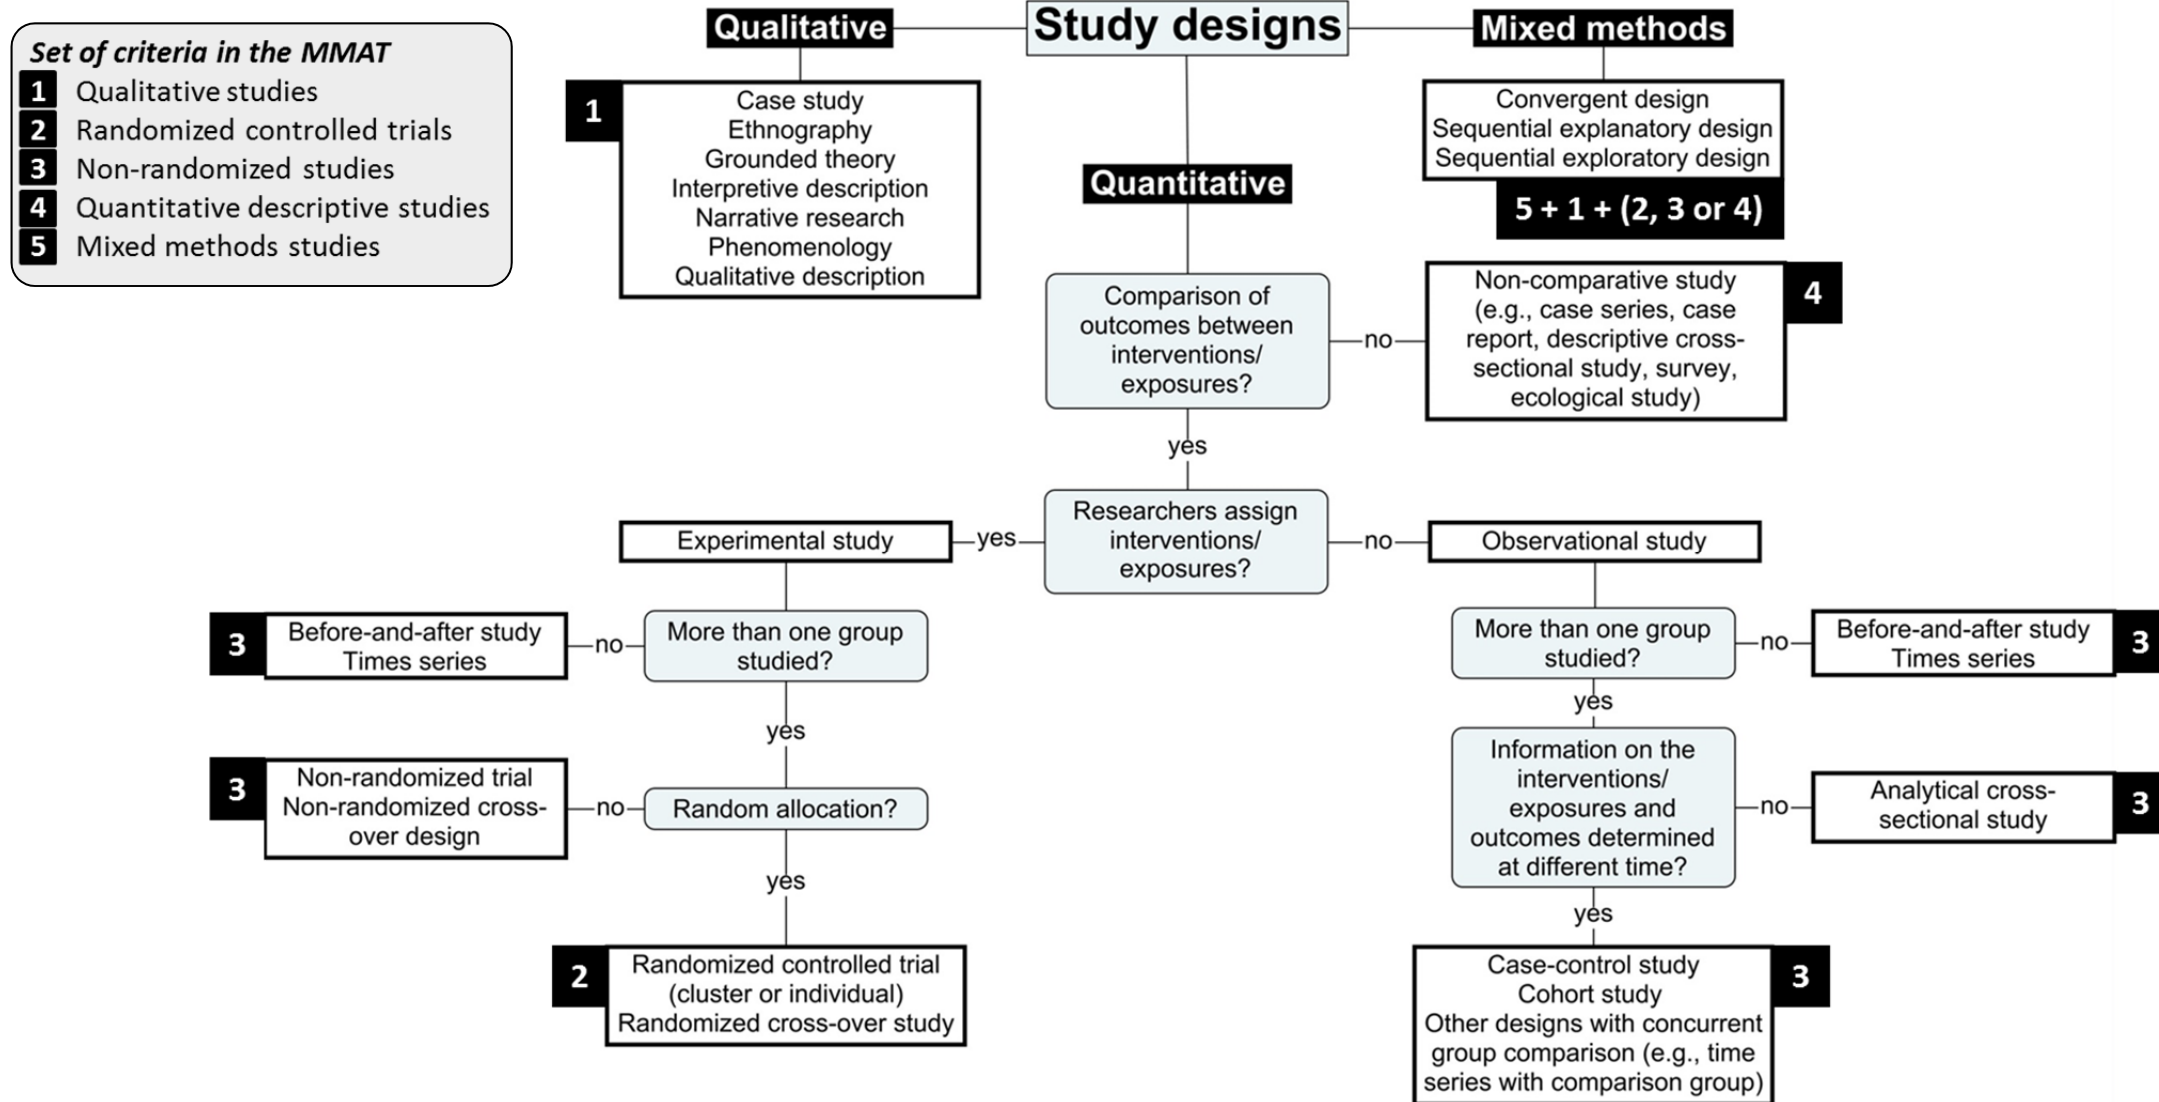

\*Adapted from National Institute for Health Care Excellence. (2012). *Methods for the development of nice public health guidance*. London: National Institute for Health and Care Excellence; and Scottish Intercollegiate Guidelines Network. (2017). *Algorithm for classifying study design for questions of effectiveness*. Retrieved December 1, 2017, from [http://www.sign.ac.uk/assets/study\\_design.pdf](http://www.sign.ac.uk/assets/study_design.pdf)

## References

- Abbott, A. (1998). The causal devolution. *Sociological Methods & Research*, 27(2), 148-181.
- Bennett, C., Khangura, S., Brehaut, J. C., Graham, I. D., Moher, D., Potter, B. K., et al. (2011). Reporting guidelines for survey research: An analysis of published guidance and reporting practices. *PLoS Medicine*, 8(8), e1001069.
- Bryman, A. (2006). Integrating quantitative and qualitative research: How is it done? *Qualitative Research*, 6(1), 97-113.
- Creswell, J. W. (2013a). *Qualitative inquiry and research design: Choosing among five approaches* (3rd ed.). Thousand Oaks, CA: SAGE Publications.
- Creswell, J. W. (2013b). *Research design: Qualitative, quantitative, and mixed methods approaches*. Thousand Oaks, CA: SAGE Publications.
- Creswell, J. W., Klassen, A. C., Plano Clark, V. L., Smith, K. C. (2011). *Best practices for mixed methods research in the health sciences*. Bethesda, MD: Office of Behavioral and Social Sciences Research, National Institutes of Health. [http://obssr.od.nih.gov/mixed\\_methods\\_research](http://obssr.od.nih.gov/mixed_methods_research).
- Creswell, J. W., & Plano Clark, V. (2017). *Designing and conducting mixed methods research* (3rd ed.). Thousand Oaks, CA: SAGE Publications.
- Critical Appraisal Skills Programme. (2017). CASP checklists. Retrieved December 1, 2017, from <http://www.casp-uk.net/casp-tools-checklists>.
- de Vet, H. C., de Bie, R. A., van der Heijden, G. J., Verhagen, A. P., Sijpkens, P., & Knipschild, P. G. (1997). Systematic reviews on the basis of methodological criteria. *Physiotherapy*, 83(6), 284-289.
- Draugalis, J. R., Coons, S. J., & Plaza, C. M. (2008). Best practices for survey research reports: A synopsis for authors and reviewers. *American Journal of Pharmaceutical Education*, 72(1), Article 11.
- Federal Committee on Statistical Methodology. (2001). *Measuring and reporting sources of error in surveys*. Washington DC: Statistical Policy Office, Office of Information and Regulatory Affairs, Office of Management and Budget.
- Grimes, D. A., & Schulz, K. F. (2002). Descriptive studies: What they can and cannot do. *The Lancet*, 359(9301), 145-149.
- Higgins, J. P., & Green, S. (2008). *Cochrane handbook for systematic reviews of interventions*. Chichester, UK: Wiley Online Library.
- Higgins, J. P. T., Sterne, J. A. C., Savović, J., Page, M. J., Hróbjartsson, A., Boutron, I., et al. (2016). A revised tool for assessing risk of bias in randomized trials. In Chandler, J., McKenzie, J., Boutron, I. & Welch, V. (Eds.), *Cochrane Methods. Cochrane Database of Systematic Reviews*, Issue 10 (Suppl 1).
- Hong, Q. N. (2018). *Revision of the Mixed Methods Appraisal Tool (MMAT): A mixed methods study* (Doctoral dissertation). Department of Family Medicine, McGill University, Montréal.
- MacLehose, R. R., Reeves, B. C., Harvey, I. M., Sheldon, T. A., Russell, I. T., & Black, A. M. (2000). A systematic review of comparisons of effect sizes derived from randomised and non-randomised studies. *Health Technology Assessment*, 4(34), 1-154.
- Morgan, R., Sterne, J., Higgins, J., Thayer, K., Schunemann, H., Rooney, A., et al. (2017). *A new instrument to assess Risk of Bias in Non-randomised Studies of Exposures (ROBINS-E): Application to studies of environmental exposure*. Abstracts of the Global Evidence Summit, Cape Town, South Africa. Cochrane Database of Systematic Reviews 2017, Issue 9 (Suppl 1). <https://doi.org/10.1002/14651858.CD201702>.
- O'Cathain, A. (2010). Assessing the quality of mixed methods research: Towards a comprehensive framework. In Tashakkori, A. & Teddlie, C. (Eds.), *Handbook of Mixed methods in social and behavioral research* (pp. 531-555). Thousand Oaks, CA: SAGE Publications.
- Oxford Centre for Evidence-based Medicine. (2016). *Levels of evidence*. Retrieved February 19, 2018, from <https://www.cebm.net/2016/05/ocbm-levels-of-evidence/>.
- Pace, R., Pluye, P., Bartlett, G., Macaulay, A. C., Salsberg, J., Jagosh, J., et al. (2012). Testing the reliability and efficiency of the pilot Mixed Methods Appraisal Tool (MMAT) for systematic mixed studies review. *International Journal of Nursing Studies*, 49(1), 47-53.
- Plano Clark, V. L., & Ivankova, N. V. (2015). *Mixed methods research: A guide to the field*. Thousand Oaks, CA: SAGE Publications.
- Pluye, P., Gagnon, M. P., Griffiths, F., Johnson-Lafleur, J. (2009a). A scoring system for appraising mixed methods research, and concomitantly appraising qualitative, quantitative and mixed methods primary studies in mixed studies reviews. *International Journal of Nursing Studies*, 46(4), 529-546.
- Pluye, P., Grad, R. M., Levine, A., & Nicolau, B. (2009b). Understanding divergence of quantitative and qualitative data (or results) in mixed methods studies. *International Journal of Multiple Research Approaches*, 3(1), 58-72.
- Pluye, P., Garcia Bengoechea, E., Granikov, V., Kaur, N., & Tang, D. L. (2018). A world of possibilities in mixed methods: Review of the combinations of strategies used to integrate the phases, results, and qualitative and quantitative data. *International Journal of Multiple Research Approaches*, 10(1), 41-56.
- Porta, M. S., Greenland, S., Hernán, M., dos Santos Silva, I., Last, J. M. (2014). *A dictionary of epidemiology*. New York: Oxford University Press.
- Sandelowski, M. (2010). What's in a name? Qualitative description revisited. *Research in Nursing and Health*, 33(1), 77-84.

- 1  
2 Schwandt, T. A. (2015). *The SAGE dictionary of qualitative inquiry*. Thousand Oaks, CA: SAGE Publications.
- 3 Sindhu, F., Carpenter, L., & Seers, K. (1997). Development of a tool to rate the quality assessment of randomized controlled trials using a Delphi technique. *Journal of Advanced Nursing*, 25(6), 1262-  
4 1268.
- 5 Sterne, J. A., Hernán, M. A., Reeves, B. C., Savović, J., Berkman, N. D., Viswanathan, M., et al. (2016). ROBINS-I: A tool for assessing risk of bias in non-randomised studies of interventions. *British*  
6 *Medical Journal*, 355(i4919).
- 7 Teddlie, C., & Tashakkori, A. (2009). *Foundations of mixed methods research: Integrating quantitative and qualitative approaches in the social and behavioral sciences*. Thousand Oaks, CA: SAGE  
8 Publications.
- 9 Thomas, B. H., Ciliska, D., Dobbins, M., & Micucci, S. (2004). A process for systematically reviewing the literature: Providing the research evidence for public health nursing interventions. *Worldviews*  
10 *on Evidence-Based Nursing*, 1(3), 176-184.
- 11 Van Tulder, M., Furlan, A., Bombardier, C., Bouter, L., & Editorial Board of the Cochrane Collaboration Back Review Group. (2003). Updated method guidelines for systematic reviews in the Cochrane  
12 Collaboration Back Review Group. *Spine*, 28(12), 1290-1299.
- 13 Viswanathan, M., & Berkman, N. D. (2012). Development of the RTI item bank on risk of bias and precision of observational studies. *Journal of Clinical Epidemiology*, 65(2), 163-178.
- 14 Wells, G., Shea, B., O'connell, D., Peterson, J., Welch, V., Losos, M., et al. (2000). *The Newcastle-Ottawa Scale (NOS) for assessing the quality of nonrandomised studies in meta-analyses*. Retrieved  
15 April 16, 2016, from [http://www.ohri.ca/programs/clinical\\_epidemiology/nosgen.pdf](http://www.ohri.ca/programs/clinical_epidemiology/nosgen.pdf).
- 16 Zaza, S., Wright-De Agüero, L. K., Briss, P. A., Truman, B. I., & Hopkins, D. P. (2000). Data collection instrument and procedure for systematic reviews in the guide to community preventive services.  
17 *American Journal of Preventive Medicine*, 188(Suppl 1), 44-74.
- 18  
19  
20  
21  
22  
23  
24  
25  
26  
27  
28  
29  
30  
31  
32  
33  
34  
35  
36  
37  
38  
39  
40  
41  
42  
43  
44  
45  
46  
47

## Supplementary additional file 1

### The detailed search strategy in PubMed

#1 (((((((((((((((("health personnel"[MeSH Terms] OR ("health"[All Fields] AND "personnel"[All Fields])) OR "health personnel"[All Fields]) OR ("healthcare"[All Fields] AND "provider"[All Fields])) OR "healthcare provider"[All Fields]) OR (((("health personnel"[MeSH Terms] OR ("health"[All Fields] AND "personnel"[All Fields])) OR "health personnel"[All Fields]) OR ("healthcare"[All Fields] AND "worker"[All Fields])) OR "healthcare worker"[All Fields])) OR (((("health personnel"[MeSH Terms] OR ("health"[All Fields] AND "personnel"[All Fields])) OR "health personnel"[All Fields]) OR ("health"[All Fields] AND "care"[All Fields]) AND "provider"[All Fields])) OR "health care provider"[All Fields])) OR ((("health personnel"[MeSH Terms] OR ("health"[All Fields] AND "personnel"[All Fields])) OR "health personnel"[All Fields]) OR (((("health personnel"[MeSH Terms] OR ("health"[All Fields] AND "personnel"[All Fields])) OR "health personnel"[All Fields]) OR ("health"[All Fields] AND "professional"[All Fields])) OR "health professional"[All Fields])) OR ((("medical staff"[MeSH Terms] OR ("medical"[All Fields] AND "staff"[All Fields])) OR "medical staff"[All Fields])) OR (((((((((((((((("medic"[All Fields] OR "medical"[All Fields]) OR "medicalization"[MeSH Terms]) OR "medicalization"[All Fields]) OR "medicalizations"[All Fields]) OR "medicalize"[All Fields]) OR "medicalized"[All Fields]) OR "medicalizes"[All Fields]) OR "medicalizing"[All Fields]) OR "medically"[All Fields]) OR "medicals"[All Fields]) OR "medicated"[All Fields]) OR "medication s"[All Fields]) OR "medics"[All Fields]) OR "pharmaceutical preparations"[MeSH Terms]) OR ("pharmaceutical"[All Fields] AND "preparations"[All Fields])) OR "pharmaceutical preparations"[All Fields]) OR "medication"[All Fields]) OR "medications"[All Fields]) AND (((("occupational groups"[MeSH Terms] OR ("occupational"[All Fields] AND "groups"[All Fields])) OR "occupational groups"[All Fields]) OR "worker"[All Fields]) OR "workers"[All Fields]) OR "worker s"[All Fields])))) OR (((("physician s"[All Fields] OR "physicians"[MeSH Terms]) OR "physicians"[All Fields]) OR "physician"[All Fields]) OR "physicians s"[All Fields])) OR ((("clinician"[All Fields] OR "clinician s"[All Fields]) OR "clinicians"[All Fields])) OR (((((((("doctor s"[All Fields] OR "doctoral"[All Fields]) OR "doctorally"[All Fields]) OR "doctorate"[All Fields]) OR "doctorates"[All Fields]) OR "doctoring"[All Fields]) OR "physicians"[MeSH Terms]) OR "physicians"[All Fields]) OR "doctor"[All Fields]) OR "doctors"[All Fields])) OR (((((((("nurse s"[All Fields] OR "nurses"[MeSH Terms]) OR "nurses"[All Fields]) OR "nurse"[All Fields]) OR "nurses s"[All Fields]) OR "nursing"[MeSH Terms]) OR

1  
 2  
 3 "nursing"[All Fields]) OR "nursings"[All Fields]) OR "nursing"[MeSH Subheading])  
 4 OR "breast feeding"[MeSH Terms]) OR ("breast"[All Fields] AND "feeding"[All  
 5 Fields])) OR "breast feeding"[All Fields]) OR "nursing s"[All Fields])) OR (("nursing  
 6 staff"[MeSH Terms] OR ("nursing"[All Fields] AND "staff"[All Fields])) OR  
 7 "nursing staff"[All Fields])) OR (((("delivery of health care"[MeSH Terms] OR  
 8 ("delivery"[All Fields] AND "health"[All Fields]) AND "care"[All Fields])) OR  
 9 "delivery of health care"[All Fields]) OR "healthcare"[All Fields]) OR "healthcare  
 10 s"[All Fields]) OR "healthcares"[All Fields]) AND (((("employee s"[All Fields] OR  
 11 "occupational groups"[MeSH Terms]) OR ("occupational"[All Fields] AND  
 12 "groups"[All Fields])) OR "occupational groups"[All Fields]) OR "employee"[All  
 13 Fields]) OR "employees"[All Fields])) OR (((((((("allied health personnel"[MeSH  
 14 Terms] OR ("allied"[All Fields] AND "health"[All Fields]) AND "personnel"[All  
 15 Fields])) OR "allied health personnel"[All Fields]) OR "paramedics"[All Fields]) OR  
 16 "emergency medical technicians"[MeSH Terms]) OR ("emergency"[All Fields] AND  
 17 "medical"[All Fields]) AND "technicians"[All Fields])) OR "emergency medical  
 18 technicians"[All Fields]) OR "paramedic"[All Fields]) OR "paramedic s"[All Fields])  
 19 OR "paramedical"[All Fields]) OR "paramedicals"[All Fields])

#### 20 21 22 23 24 25 26 27 28 29 **#1 Searching results =2217945**

30  
 31 **#2** (((((((((((((((("experience"[All Fields] OR "experience s"[All Fields]) OR  
 32 "experiences"[All Fields]) OR (((((((("percept"[All Fields] OR "perceptibility"[All  
 33 Fields]) OR "perceptible"[All Fields]) OR "perception"[MeSH Terms]) OR  
 34 "perception"[All Fields]) OR "perceptions"[All Fields]) OR "perceptual"[All Fields])  
 35 OR "perceptive"[All Fields]) OR "perceptiveness"[All Fields]) OR "percepts"[All  
 36 Fields])) OR (((("attitude"[MeSH Terms] OR "attitude"[All Fields]) OR "attitudes"[All  
 37 Fields]) OR "attitude s"[All Fields])) OR (((("attitude"[MeSH Terms] OR  
 38 "attitude"[All Fields]) OR "opinion"[All Fields]) OR "opinions"[All Fields]) OR  
 39 "opinion s"[All Fields]) OR "opinionated"[All Fields])) OR (((((((("impact"[All Fields]  
 40 OR "impactful"[All Fields]) OR "impacting"[All Fields]) OR "impacts"[All Fields])  
 41 OR "tooth, impacted"[MeSH Terms]) OR ("tooth"[All Fields] AND "impacted"[All  
 42 Fields])) OR "impacted tooth"[All Fields]) OR "impacted"[All Fields])) OR  
 43 (((("affect"[MeSH Terms] OR "affect"[All Fields]) OR "affects"[All Fields]) OR  
 44 "affected"[All Fields]) OR "affecteds"[All Fields]) OR "affecting"[All Fields])) OR  
 45 (((((((("emoting"[All Fields] OR "emotion s"[All Fields]) OR "emotions"[MeSH  
 46 Terms]) OR "emotions"[All Fields]) OR "emotion"[All Fields]) OR "emotional"[All  
 47 Fields]) OR "emotive"[All Fields])) OR ((("affect"[MeSH Terms] OR "affect"[All  
 48 Fields]) OR "mood"[All Fields])) OR (((((((("mental"[All Fields] OR  
 49 "mentalities"[All Fields]) OR "mentality"[All Fields]) OR "mentalization"[MeSH  
 50 Terms]) OR "mentalization"[All Fields]) OR "mentalizing"[All Fields]) OR



1  
2  
3 "mentalize"[All Fields]) OR "mentalized"[All Fields]) OR "mentally"[All Fields]))  
4 OR (((("stress, psychological"[MeSH Terms] OR ("stress"[All Fields] AND  
5 "psychological"[All Fields])) OR "psychological stress"[All Fields]) OR ("stress"[All  
6 Fields] AND "psychological"[All Fields])) OR "stress psychological"[All Fields]))  
7 OR ((("psychological distress"[MeSH Terms] OR ("psychological"[All Fields] AND  
8 "distress"[All Fields])) OR "psychological distress"[All Fields])) OR ((("affective  
9 symptoms"[MeSH Terms] OR ("affective"[All Fields] AND "symptoms"[All Fields]))  
10 OR "affective symptoms"[All Fields])) OR (((((((((((("stress, psychological"[MeSH  
11 Terms] OR ("stress"[All Fields] AND "psychological"[All Fields])) OR  
12 "psychological stress"[All Fields]) OR "suffer"[All Fields]) OR "suffered"[All Fields])  
13 OR "suffering"[All Fields]) OR "sufferings"[All Fields]) OR "suffers"[All Fields])  
14 OR "suffereing"[All Fields]) OR "sufferer"[All Fields]) OR "sufferer s"[All Fields])  
15 OR "sufferers"[All Fields]) OR "suffered"[All Fields])) OR (((("anxiety"[MeSH  
16 Terms] OR "anxiety"[All Fields]) OR "anxieties"[All Fields]) OR "anxiety s"[All  
17 Fields])) OR ((("anxiety"[MeSH Terms] OR "anxiety"[All Fields]) OR  
18 "nervousness"[All Fields])) OR (((((((((((("depressed"[All Fields] OR  
19 "depression"[MeSH Terms]) OR "depression"[All Fields]) OR "depressions"[All  
20 Fields]) OR "depression s"[All Fields]) OR "depressive disorder"[MeSH Terms]) OR  
21 ("depressive"[All Fields] AND "disorder"[All Fields])) OR "depressive disorder"[All  
22 Fields]) OR "depressivity"[All Fields]) OR "depressive"[All Fields]) OR  
23 "depressively"[All Fields]) OR "depressiveness"[All Fields]) OR "depressives"[All  
24 Fields])) OR (((("sleep initiation and maintenance disorders"[MeSH Terms] OR  
25 (((("sleep"[All Fields] AND "initiation"[All Fields]) AND "maintenance"[All Fields])  
26 AND "disorders"[All Fields])) OR "sleep initiation and maintenance disorders"[All  
27 Fields]) OR "insomnia"[All Fields]) OR "insomnias"[All Fields])) OR (((("sleep wake  
28 disorders"[MeSH Terms] OR ((("sleep"[All Fields] AND "wake"[All Fields]) AND  
29 "disorders"[All Fields])) OR "sleep wake disorders"[All Fields]) OR ("sleep"[All  
30 Fields] AND "disorder"[All Fields])) OR "sleep disorder"[All Fields])) OR  
31 (((((((("stress"[All Fields] OR "stressed"[All Fields]) OR "stresses"[All Fields]) OR  
32 "stressful"[All Fields]) OR "stressfulness"[All Fields]) OR "stressing"[All Fields])  
33 AND ("level"[All Fields] OR "levels"[All Fields])))) OR (((((((((((((((("infect"[All  
34 Fields] OR "infectability"[All Fields]) OR "infectable"[All Fields]) OR  
35 "infectant"[All Fields]) OR "infectants"[All Fields]) OR "infected"[All Fields]) OR  
36 "infecteds"[All Fields]) OR "infectibility"[All Fields]) OR "infectible"[All Fields])  
37 OR "infecting"[All Fields]) OR "infection s"[All Fields]) OR "infections"[MeSH  
38 Terms]) OR "infections"[All Fields]) OR "infection"[All Fields]) OR "infective"[All  
39 Fields]) OR "infectiveness"[All Fields]) OR "infectives"[All Fields]) OR  
40 "infectivities"[All Fields]) OR "infects"[All Fields]) OR "pathogenicity"[MeSH  
41 Subheading]) OR "pathogenicity"[All Fields]) OR "infectivity"[All Fields])) OR

1  
2  
3  
4  
5  
6  
7  
8  
9  
10  
11  
12  
13  
14  
15  
16  
17  
18  
19  
20  
21  
22  
23  
24  
25  
26  
27  
28  
29  
30  
31  
32  
33  
34  
35  
36  
37  
38  
39  
40  
41  
42  
43  
44  
45  
46  
47  
48  
49  
50  
51  
52  
53  
54  
55  
56  
57  
58  
59  
60

((((((((("epidemiology"[MeSH Subheading] OR "epidemiology"[All Fields]) OR "prevalence"[All Fields]) OR "prevalence"[MeSH Terms]) OR "prevalance"[All Fields]) OR "prevalences"[All Fields]) OR "prevalence s"[All Fields]) OR "prevalent"[All Fields]) OR "prevalently"[All Fields]) OR "prevalents"[All Fields])

## #2 Searching results =10163250

#3 (((((((((((((((((((("coronavirus"[MeSH Terms] OR "coronavirus"[All Fields]) OR "coronaviruses"[All Fields]) OR (((((((("covid 19"[All Fields] OR "covid 2019"[All Fields]) OR "severe acute respiratory syndrome coronavirus 2"[Supplementary Concept]) OR "severe acute respiratory syndrome coronavirus 2"[All Fields]) OR "2019 ncov"[All Fields]) OR "sars cov 2"[All Fields]) OR "2019ncov"[All Fields]) OR (("wuhan"[All Fields] AND ("coronavirus"[MeSH Terms] OR "coronavirus"[All Fields])) AND (2019/12/1:2019/12/31[Date - Publication] OR 2020/1/1:2020/12/31[Date - Publication]))) OR "SARSCOV2"[All Fields]) OR (("severe acute respiratory syndrome coronavirus 2"[Supplementary Concept] OR "severe acute respiratory syndrome coronavirus 2"[All Fields]) OR "2019 ncov"[All Fields])) OR (((("covid 19"[Supplementary Concept] OR "covid 19"[All Fields]) OR "covid19"[All Fields]) AND "Ncov"[All Fields])) OR ("2019"[All Fields] AND ((("coronavirus"[MeSH Terms] OR "coronavirus"[All Fields]) OR "coronaviruses"[All Fields]))) OR (((("novel"[All Fields] OR "novel s"[All Fields]) OR "novels"[All Fields]) AND ((("coronavirus"[MeSH Terms] OR "coronavirus"[All Fields]) OR "coronaviruses"[All Fields]))) OR ("new"[All Fields] AND ((("coronavirus"[MeSH Terms] OR "coronavirus"[All Fields]) OR "coronaviruses"[All Fields]))) OR ("nouveau"[All Fields] AND ((("coronavirus"[MeSH Terms] OR "coronavirus"[All Fields]) OR "coronaviruses"[All Fields]))) OR ((("covid 19"[Supplementary Concept] OR "covid 19"[All Fields]) OR "covid19"[All Fields])) OR (((("acute"[All Fields] OR "acutely"[All Fields]) OR "acutes"[All Fields]) AND "respiratory"[All Fields] AND (((((((("syndrom"[All Fields] OR "syndromal"[All Fields]) OR "syndromally"[All Fields]) OR "syndrome"[MeSH Terms]) OR "syndrome"[All Fields]) OR "syndromes"[All Fields]) OR "syndrome s"[All Fields]) OR "syndromic"[All Fields]) OR "syndroms"[All Fields]) AND ((("coronavirus"[MeSH Terms] OR "coronavirus"[All Fields]) OR "coronaviruses"[All Fields]) AND "2"[All Fields])) OR "SARS-2"[All Fields]) OR ((("severe acute respiratory syndrome coronavirus 2"[Supplementary Concept] OR "severe acute respiratory syndrome coronavirus 2"[All Fields]) OR "wuhan seafood market pneumonia virus"[All Fields])) OR "SARS"[All Fields]) OR (((("sars virus"[MeSH Terms] OR ("SARS"[All Fields] AND "virus"[All Fields])) OR "sars virus"[All Fields]) OR ("SARS"[All Fields] AND "cov"[All Fields])) OR "sars cov"[All Fields])) OR ((("sars virus"[MeSH Terms] OR ("SARS"[All Fields] AND "virus"[All Fields])) OR "sars virus"[All Fields])) OR

("severe acute respiratory syndrome"[MeSH Terms] OR (((("severe"[All Fields] AND  
 "acute"[All Fields]) AND "respiratory"[All Fields]) AND "syndrome"[All Fields]))  
 OR "severe acute respiratory syndrome"[All Fields])) OR (((("coronavirus  
 infections"[MeSH Terms] OR ("coronavirus"[All Fields] AND "infections"[All  
 Fields])) OR "coronavirus infections"[All Fields]) OR "mers"[All Fields])) OR  
 (((("middle east respiratory syndrome coronavirus"[MeSH Terms] OR  
 (((("middle"[All Fields] AND "east"[All Fields]) AND "respiratory"[All Fields])  
 AND "syndrome"[All Fields]) AND "coronavirus"[All Fields])) OR "middle east  
 respiratory syndrome coronavirus"[All Fields]) OR ("mers"[All Fields] AND  
 "virus"[All Fields])) OR "mers virus"[All Fields])) OR (((("coronavirus  
 infections"[MeSH Terms] OR ("coronavirus"[All Fields] AND "infections"[All  
 Fields])) OR "coronavirus infections"[All Fields]) OR (((("middle"[All Fields] AND  
 "east"[All Fields]) AND "respiratory"[All Fields]) AND "syndrome"[All Fields])) OR  
 "middle east respiratory syndrome"[All Fields])) OR (((("middle east respiratory  
 syndrome coronavirus"[MeSH Terms] OR (((("middle"[All Fields] AND "east"[All  
 Fields]) AND "respiratory"[All Fields]) AND "syndrome"[All Fields]) AND  
 "coronavirus"[All Fields])) OR "middle east respiratory syndrome coronavirus"[All  
 Fields]) OR (((("middle"[All Fields] AND "east"[All Fields]) AND "respiratory"[All  
 Fields]) AND "syndrome"[All Fields]) AND "related"[All Fields]) AND  
 "coronavirus"[All Fields])) OR "middle east respiratory syndrome related  
 coronavirus"[All Fields])) OR (((("middle east respiratory syndrome  
 coronavirus"[MeSH Terms] OR (((("middle"[All Fields] AND "east"[All Fields])  
 AND "respiratory"[All Fields]) AND "syndrome"[All Fields]) AND  
 "coronavirus"[All Fields])) OR "middle east respiratory syndrome coronavirus"[All  
 Fields]) OR ("mers"[All Fields] AND "cov"[All Fields])) OR "mers cov"[All Fields])

### #3 Searching results =68640

#4 (((((((((((((((((((((((((((("cohort studies"[MeSH Terms] OR ("cohort"[All Fields]  
 AND "studies"[All Fields])) OR "cohort studies"[All Fields]) OR ("cohort"[All Fields]  
 AND "study"[All Fields])) OR "cohort study"[All Fields]) OR (((("cohort  
 studies"[MeSH Terms] OR ("cohort"[All Fields] AND "studies"[All Fields])) OR  
 "cohort studies"[All Fields]) OR ("incidence"[All Fields] AND "study"[All Fields]))  
 OR "incidence study"[All Fields])) OR (((("cohort studies"[MeSH Terms] OR  
 ("cohort"[All Fields] AND "studies"[All Fields])) OR "cohort studies"[All Fields])  
 OR ("cohort"[All Fields] AND "analysis"[All Fields])) OR "cohort analysis"[All  
 Fields])) OR (((("cohort studies"[MeSH Terms] OR ("cohort"[All Fields] AND  
 "studies"[All Fields])) OR "cohort studies"[All Fields]) OR ("cohort"[All Fields]  
 AND "analyses"[All Fields])) OR "cohort analyses"[All Fields])) OR (((("cohort  
 studies"[MeSH Terms] OR ("cohort"[All Fields] AND "studies"[All Fields])) OR

1  
2  
3 "cohort studies"[All Fields]) OR ("concurrent"[All Fields] AND "study"[All Fields])  
4 OR "concurrent study"[All Fields]) OR (((("cohort studies"[MeSH Terms] OR  
5 ("cohort"[All Fields] AND "studies"[All Fields])) OR "cohort studies"[All Fields])  
6 OR ((("closed"[All Fields] AND "cohort"[All Fields]) AND "study"[All Fields])) OR  
7 "closed cohort study"[All Fields])) OR (((("cohort studies"[MeSH Terms] OR  
8 ("cohort"[All Fields] AND "studies"[All Fields])) OR "cohort studies"[All Fields])  
9 OR ((("historical"[All Fields] AND "cohort"[All Fields]) AND "study"[All Fields]))  
10 OR "historical cohort study"[All Fields])) OR (((("cross-sectional studies"[MeSH  
11 Terms] OR ("cross sectional"[All Fields] AND "studies"[All Fields])) OR "cross  
12 sectional studies"[All Fields]) OR ("prevalence"[All Fields] AND "study"[All Fields]))  
13 OR "prevalence study"[All Fields])) OR (((("cross-sectional studies"[MeSH Terms]  
14 OR ("cross sectional"[All Fields] AND "studies"[All Fields])) OR "cross sectional  
15 studies"[All Fields]) OR ((("disease"[All Fields] AND "frequency"[All Fields]) AND  
16 "survey"[All Fields]))) OR (((("cross-sectional studies"[MeSH Terms] OR ("cross  
17 sectional"[All Fields] AND "studies"[All Fields])) OR "cross sectional studies"[All  
18 Fields]) OR ("cross"[All Fields] AND "sectional"[All Fields])) OR "cross  
19 sectional"[All Fields]) OR (((("cross-sectional studies"[MeSH Terms] OR ("cross  
20 sectional"[All Fields] AND "studies"[All Fields])) OR "cross sectional studies"[All  
21 Fields]) OR ("cross"[All Fields] AND "sectional"[All Fields])) OR "cross  
22 sectional"[All Fields]) OR ((("empirical research"[MeSH Terms] OR ("empirical"[All  
23 Fields] AND "research"[All Fields])) OR "empirical research"[All Fields])) OR  
24 (((("qualitative research"[MeSH Terms] OR ("qualitative"[All Fields] AND  
25 "research"[All Fields])) OR "qualitative research"[All Fields]) OR ("qualitative"[All  
26 Fields] AND "study"[All Fields])) OR "qualitative study"[All Fields])) OR  
27 ((("qualitative research"[MeSH Terms] OR ("qualitative"[All Fields] AND  
28 "research"[All Fields])) OR "qualitative research"[All Fields])) OR  
29 (((("qualitative"[All Fields] OR "qualitatively"[All Fields]) OR "qualitatives"[All  
30 Fields]) AND (((("description"[All Fields] OR "descriptions"[All Fields]) OR  
31 "descriptive"[All Fields]) OR "descriptively"[All Fields]) OR "descriptives"[All  
32 Fields]))) OR (((("phenomenologic"[All Fields] OR "phenomenological"[All Fields])  
33 OR "phenomenologically"[All Fields]) AND (((("studies"[All Fields] OR "study"[All  
34 Fields]) OR "study s"[All Fields]) OR "studying"[All Fields]) OR "studys"[All  
35 Fields]))) OR ((("grounded theory"[MeSH Terms] OR ("grounded"[All Fields] AND  
36 "theory"[All Fields])) OR "grounded theory"[All Fields])) OR (((("anthropology,  
37 cultural"[MeSH Terms] OR ("anthropology"[All Fields] AND "cultural"[All Fields]))  
38 OR "cultural anthropology"[All Fields]) OR "ethnographies"[All Fields]) OR  
39 "ethnography"[All Fields]) OR (((("anthropologies"[All Fields] OR  
40 "anthropology"[MeSH Terms]) OR "anthropology"[All Fields]) OR "anthropology  
41 s"[All Fields])) OR (((("behavioural research"[All Fields] OR "behavioral

1  
 2  
 3 research"[MeSH Terms]) OR ("behavioral"[All Fields] AND "research"[All Fields])  
 4 OR "behavioral research"[All Fields]) OR (((("health services research"[MeSH  
 5 Terms] OR ("health"[All Fields] AND "services"[All Fields]) AND "research"[All  
 6 Fields])) OR "health services research"[All Fields]) OR ("action"[All Fields] AND  
 7 "research"[All Fields]) OR "action research"[All Fields]) OR (((("mixed"[All Fields]  
 8 OR "mixes"[All Fields]) OR "mixing"[All Fields]) OR "mixings"[All Fields]) AND  
 9 (((("method s"[All Fields] OR "methods"[MeSH Terms]) OR "methods"[All Fields]  
 10 OR "method"[All Fields]) OR "methods"[MeSH Subheading]))) OR  
 11 "mixed-method"[All Fields]) OR (((((((((((("investigated"[All Fields] OR  
 12 "investigates"[All Fields]) OR "investigating"[All Fields]) OR "investigation"[All  
 13 Fields]) OR "investigations"[All Fields]) OR "investigative"[All Fields]) OR  
 14 "investigator s"[All Fields]) OR "research personnel"[MeSH Terms]) OR  
 15 ("research"[All Fields] AND "personnel"[All Fields])) OR "research personnel"[All  
 16 Fields]) OR "investigator"[All Fields]) OR "investigators"[All Fields]) AND  
 17 (((((((((((("research personnel"[MeSH Terms] OR ("research"[All Fields] AND  
 18 "personnel"[All Fields])) OR "research personnel"[All Fields]) OR "researcher"[All  
 19 Fields]) OR "researchers"[All Fields]) OR "research"[MeSH Terms]) OR  
 20 "research"[All Fields]) OR "research s"[All Fields]) OR "researchable"[All Fields])  
 21 OR "researche"[All Fields]) OR "researched"[All Fields]) OR "researcher s"[All  
 22 Fields]) OR "researches"[All Fields]) OR "researching"[All Fields]) OR  
 23 "researchs"[All Fields])))) OR (((((((((((("investigated"[All Fields] OR  
 24 "investigates"[All Fields]) OR "investigating"[All Fields]) OR "investigation"[All  
 25 Fields]) OR "investigations"[All Fields]) OR "investigative"[All Fields]) OR  
 26 "investigator s"[All Fields]) OR "research personnel"[MeSH Terms]) OR  
 27 ("research"[All Fields] AND "personnel"[All Fields])) OR "research personnel"[All  
 28 Fields]) OR "investigator"[All Fields]) OR "investigators"[All Fields]) AND  
 29 (((("studies"[All Fields] OR "study"[All Fields]) OR "study s"[All Fields]) OR  
 30 "studying"[All Fields]) OR "studys"[All Fields])

31  
32  
33  
34  
35  
36  
37  
38  
39  
40  
41  
42  
43  
44  
45  
46 **#4 Searching results =6261727**

47  
48 **#5 (#1 AND #2 AND #3 AND #4) Searching results =2038**

**PRISMA-P (Preferred Reporting Items for Systematic review and Meta-Analysis Protocols) 2015 checklist: recommended items to address in a systematic review protocol\***

| Section and topic                 | Item No | Checklist item                                                                                                                                                                                                                                                                                                                                                                                                                                                                                                                                                                                                               |
|-----------------------------------|---------|------------------------------------------------------------------------------------------------------------------------------------------------------------------------------------------------------------------------------------------------------------------------------------------------------------------------------------------------------------------------------------------------------------------------------------------------------------------------------------------------------------------------------------------------------------------------------------------------------------------------------|
| <b>ADMINISTRATIVE INFORMATION</b> |         |                                                                                                                                                                                                                                                                                                                                                                                                                                                                                                                                                                                                                              |
| Title:                            |         | The experiences and impacts of health-care providers during the Coronavirus pandemic: protocol for a mixed methods systematic review                                                                                                                                                                                                                                                                                                                                                                                                                                                                                         |
| Identification                    | 1a      | Identify the report as a protocol of a mixed methods systematic review                                                                                                                                                                                                                                                                                                                                                                                                                                                                                                                                                       |
| Update                            | 1b      | If the protocol is for an update of a previous systematic review, identify as such                                                                                                                                                                                                                                                                                                                                                                                                                                                                                                                                           |
| Registration                      | 2       | The systematic review has registered with the PROSPERO. CRD 42020198506                                                                                                                                                                                                                                                                                                                                                                                                                                                                                                                                                      |
| Authors:                          |         |                                                                                                                                                                                                                                                                                                                                                                                                                                                                                                                                                                                                                              |
| Contact                           | 3a      | Na Xu <sup>1</sup> E-mail: xuna5220@stu.xjtu.edu.cn<br>AiLi Lv <sup>1</sup> E-mail: aili@mail.xjtu.edu.cn<br>TianZi Li <sup>1</sup> E-mail: 2662828124@qq.com<br>XiaoFeng Li <sup>2</sup> E-mail: 2383307590@qq.com<br>Mei Huang <sup>3</sup> E-mail: huangmei_1995@163.com<br>Yan Su <sup>1</sup> E-mail: 3293679480@qq.com<br>1 Health Science Center, Xi'an Jiaotong University, Xi'an, (Shaan Xi,) China<br>2 Tongji University Tenth People's Hospital, Shang Hai, China<br>3 Department of Nursing, Air Force Medical University, Xi'an, (Shaan Xi,) China<br>Corresponding Author<br>Aili Lv<br>Health Science Center |

Xi'an Jiaotong University  
 No.76 Yanta West Road  
 Xi'an, Shaan Xi, 710061, China  
 Tel: 13709209696

|                           |    |                                                                                                                                                                                                                                                                                                                                                                                   |
|---------------------------|----|-----------------------------------------------------------------------------------------------------------------------------------------------------------------------------------------------------------------------------------------------------------------------------------------------------------------------------------------------------------------------------------|
| Contributions             | 3b | NX and AL conceived and designed the initial study. NX and TL drafted the initial protocol. All authors contributed to the development of the selection criteria, the risk of a bias assessment strategy, and data extraction criteria. AL is the guarantor of the review. All authors read, provided feedback, and approved the final protocol before submission to the journal. |
| Amendments                | 4  | The protocol does not represent an amendment of a previously completed or published protocol.                                                                                                                                                                                                                                                                                     |
| Support:                  |    |                                                                                                                                                                                                                                                                                                                                                                                   |
| Sources                   | 5a | This research received no specific grant from any funding agency in the public, commercial or not-for-profit sectors.                                                                                                                                                                                                                                                             |
| Sponsor                   | 5b | None                                                                                                                                                                                                                                                                                                                                                                              |
| Role of sponsor or funder | 5c | None                                                                                                                                                                                                                                                                                                                                                                              |

**INTRODUCTION**

|            |   |                                                                                                                                                                                                                                                                                                                                                                                                                                                                                                                                                                                                                                                                                                                                                                                                                                                                                                                                                                                                                                                                                       |
|------------|---|---------------------------------------------------------------------------------------------------------------------------------------------------------------------------------------------------------------------------------------------------------------------------------------------------------------------------------------------------------------------------------------------------------------------------------------------------------------------------------------------------------------------------------------------------------------------------------------------------------------------------------------------------------------------------------------------------------------------------------------------------------------------------------------------------------------------------------------------------------------------------------------------------------------------------------------------------------------------------------------------------------------------------------------------------------------------------------------|
| Rationale  | 6 | Frontline health-care providers are redeployed to areas outside their clinical expertise and assigned high-loading workload to address the surge of patients with each coronavirus outbreaks. Their importance in crisis is not in doubt. However, we found that the doctors, especially nurses, who came back from the epidemic in Wuhan, showed obvious changes in characters and mood, resulting in their inability to integrate into their original work or life for a long time. What are their feelings and experiences in the first-line of fighting the epidemic? What is the impact of this experience on them? To our knowledge, there are few systematic reviews that will assess the experience and impact of health-care providers during the coronavirus outbreak. Comprehensive understanding of what their real experiences and impacts are will have a significant meaningful when their lives and security are threatened. Meanwhile, this is also stronger evidence in clinical practice of sustained and comprehensive support measures to health care providers. |
| Objectives | 7 | The main aim of the present protocol is to conduct a mixed methods systematic review to summarize the evidence on the experiences of health-care providers and impacts on their psychological and infection during the coronavirus pandemics.                                                                                                                                                                                                                                                                                                                                                                                                                                                                                                                                                                                                                                                                                                                                                                                                                                         |

**METHODS**

|                      |    |                                                                                                                                                                                                                                                                                                                                                                                                                                                                                                                                                                                                                                                                                                                                                                                                                                                                                                                                                                                                                                                                                                                                                                                                                                                                                                                                                                                                                                                                                                                                                                                                                                                                                                                                                                                                                                                                                                                                                                                                                                                                                                                                                                                                                                                                                                                                                                                                                                                                                                                                                                                                                                                                                                                                                                                                                                                                     |
|----------------------|----|---------------------------------------------------------------------------------------------------------------------------------------------------------------------------------------------------------------------------------------------------------------------------------------------------------------------------------------------------------------------------------------------------------------------------------------------------------------------------------------------------------------------------------------------------------------------------------------------------------------------------------------------------------------------------------------------------------------------------------------------------------------------------------------------------------------------------------------------------------------------------------------------------------------------------------------------------------------------------------------------------------------------------------------------------------------------------------------------------------------------------------------------------------------------------------------------------------------------------------------------------------------------------------------------------------------------------------------------------------------------------------------------------------------------------------------------------------------------------------------------------------------------------------------------------------------------------------------------------------------------------------------------------------------------------------------------------------------------------------------------------------------------------------------------------------------------------------------------------------------------------------------------------------------------------------------------------------------------------------------------------------------------------------------------------------------------------------------------------------------------------------------------------------------------------------------------------------------------------------------------------------------------------------------------------------------------------------------------------------------------------------------------------------------------------------------------------------------------------------------------------------------------------------------------------------------------------------------------------------------------------------------------------------------------------------------------------------------------------------------------------------------------------------------------------------------------------------------------------------------------|
| Eligibility criteria | 8  | <p>Only published studies are original articles, and studies that reported the experience, perspective, anxiety, depression, insomnia, and infection rates of health-care providers who took care of patients with SRAS, MERS, and COVID-19 will be accepted in this study. For language restrictions, only studies in English and Chinese will be accepted.</p> <p>Types of participants:<br/>This review will include studies where participants are health-care providers who treat and cure the patients diagnosed with coronavirus infection, working in designated hospital and having a close contact with infected patients. The gender, age and major field of participants will not be limited. But medical students or trainees will be excluded.</p> <p>Phenomenon of interest/exposure(s)<br/>Our phenomenon of interest will focus on studies that the experience, perspective and impact of health-care providers who took care of patients will be all considered in qualitative review. The term “experience” and “perspective” consisted of all factors impact on the feeling and mood of providers from coronavirus. The “impact” defined as that health-care providers perceive the impact by themselves, whether physical or psychological or lifestyle habits. This review will consider quantitative studies that anxiety, depression, insomnia and infection rates of health-care providers during the SRAS, MERS, and COVID-19 pandemic.</p> <p>Context<br/>This review will consider studies that were in the context of a pandemic caused by coronavirus, including SRAS, MERS, and COVID-19. Coronavirus diagnosis was in accordance with the World Health Organization.</p> <p>Types of studies<br/>We will include studies that use quantitative (including cross-sectional, cohort studies), qualitative (including but not limited to, designs such as phenomenology, grounded theory, ethnography, action research, qualitative description) and mixed-methods methodologies. We will exclude case reports and articles, such as conference abstracts, editorials, letters, reviews and commentaries. Systematic reviews and meta-analyses will not be included, but if a systematic review is relevant to our topic we will refer to its inclusion articles and reference list for additional potentially qualified studies.</p> <p>Exclusion criteria<br/>Studies that did not report levels of anxiety, depression or morbidity for health-care providers in pandemics, and studies that didn’t state the number of patients will be excluded. Studies that analysed mental and behavioural disorders due to the use of an existing primary disease, alcohol and other drugs will not be included. Studies that measure anxiety, depression and insomnia but do not use the universal international scale will be excluded.</p> |
| Information sources  | 9  | <p>The literature searches have been conducted in electronic bibliographic databases, including MEDLINE, EMBASE, the Cochrane Library (CENTRAL), Web of Science, PubMed, Psychology Information (PsycINFO), 万方/Wan Fang data, and 中国生物医学文献数据库/SinoMed, from inception until 30 July 2020. In addition to the mentioned search strategy, we will manually search reference lists of included studies to identify any additional studies that fit the inclusion criteria.</p>                                                                                                                                                                                                                                                                                                                                                                                                                                                                                                                                                                                                                                                                                                                                                                                                                                                                                                                                                                                                                                                                                                                                                                                                                                                                                                                                                                                                                                                                                                                                                                                                                                                                                                                                                                                                                                                                                                                                                                                                                                                                                                                                                                                                                                                                                                                                                                                         |
| Search strategy      | 10 | <p>#1 [All Fields] ((Healthcare Provider) OR (Healthcare Worker) OR (Health Care Provider) OR (health personnel) OR (health professional) OR (Medical staff) OR (Medical worker) OR (Physician) OR (Clinician) OR (Doctor) OR (Nurse) OR (Nursing Staff) OR (Healthcare employee) OR (Paramedic))</p> <p>#2 [All Fields] (Experience OR perception OR Attitude OR Opinion OR Impact OR Affect OR Emotion OR Mood OR Mental OR (Stress Psychological) OR (Psychological Distress) OR (Affective Symptoms) OR Suffering OR anxiety OR</p>                                                                                                                                                                                                                                                                                                                                                                                                                                                                                                                                                                                                                                                                                                                                                                                                                                                                                                                                                                                                                                                                                                                                                                                                                                                                                                                                                                                                                                                                                                                                                                                                                                                                                                                                                                                                                                                                                                                                                                                                                                                                                                                                                                                                                                                                                                                             |



1  
2  
3  
4  
5  
6  
7  
8  
9  
10  
11  
12  
13  
14  
15  
16  
17  
18  
19  
20  
21  
22  
23  
24  
25  
26  
27  
28  
29  
30  
31  
32  
33  
34  
35  
36  
37  
38  
39  
40  
41  
42  
43  
44  
45  
46

---

Nervousness OR depression OR insomnia OR (sleep disorder) OR (stress levels) OR infection OR prevalence)  
 #3 [All Fields](Coronavirus OR COVID-19 OR SARSCOV2 OR 2019-nCov OR (covid19 Ncov) OR (2019 coronavirus)  
 OR (novel coronavirus) OR (new coronavirus) OR (nouveau coronavirus) OR (COVID19) OR (2019-severe acute  
 respiratory syndrome coronavirus 2) OR (SARS-2) OR (Wuhan seafood market pneumonia virus) OR (SARS) OR  
 SARS-CoV OR (SARS VIRUS) OR (severe acute respiratory syndrome) OR (MERS) OR (MERS-VIRUS) OR (Middle  
 East Respiratory Syndrome) OR (Middle East respiratory syndrome related coronavirus) OR (MERS-CoV))  
 #4 [All Fields]((cohort study) OR (Incidence Study) OR (Cohort Analysis) OR (Cohort Analyses) OR (Concurrent Study)  
 OR (Closed Cohort Study) OR (Historical Cohort Study) OR (Prevalence Study) OR (Disease Frequency Survey) OR  
 (Cross-Sectional) OR (Cross Sectional) OR (Empirical Research) OR (qualitative study) OR (qualitative Research) OR  
 (Qualitative description) OR (phenomenological study) OR (Grounded Theory) OR (ethnography) OR ( Anthropology) OR  
 (Behavioral Research) OR (action research) OR (mixed method) OR (mixed-method) OR (Investigative research) OR  
 (Investigative study))  
 #5 #1 AND #2 AND #3 AND #4

---

|                                    |     |                                                                                                                                                                                                                                                                                                                                                                                                                                                                                                                                                                                                                                                                                                                                                                                                     |
|------------------------------------|-----|-----------------------------------------------------------------------------------------------------------------------------------------------------------------------------------------------------------------------------------------------------------------------------------------------------------------------------------------------------------------------------------------------------------------------------------------------------------------------------------------------------------------------------------------------------------------------------------------------------------------------------------------------------------------------------------------------------------------------------------------------------------------------------------------------------|
| Study records:                     |     |                                                                                                                                                                                                                                                                                                                                                                                                                                                                                                                                                                                                                                                                                                                                                                                                     |
| Data management                    | 11a | The search results will be imported into the Endnote X9 software. Duplicate and unrelated studies will be deleted.                                                                                                                                                                                                                                                                                                                                                                                                                                                                                                                                                                                                                                                                                  |
| Selection process                  | 11b | Two independent evaluators will first screen the study title and abstract to determine its substitutability. Eligibility for each study will be tested against predefined eligibility criteria and quality assessment guidelines. In all cases, the decision to include or exclude a study must be approved by two reviewers. If a decision cannot be made, a third reviewer will make the final decision. A flow chart using PRISMA's reporting guidelines will be used to report the selection process and results.                                                                                                                                                                                                                                                                               |
| Data collection process            | 11c | Two authors will independently extract data. Any disagreement will be resolved by discussion until consensus is reached by consulting a third author.                                                                                                                                                                                                                                                                                                                                                                                                                                                                                                                                                                                                                                               |
| Data items                         | 12  | Research information: first author, year of publication, country of the study; Demographic information: populations(doctors, nurses and others), hospital level, qualification for the job, sample size, age; Qualitative studies: study methods, contexts, culture, and interest outcomes(the experiences, perspectives and impacts of health-care providers); Quantitative studies: study design will be extracted. The incidence and number of cases about anxiety, depression, insomnia and coronavirus infected among medical staff will be extracted.                                                                                                                                                                                                                                         |
| Outcomes and prioritization        | 13  | experiences, perspectives and impacts of health-care providers                                                                                                                                                                                                                                                                                                                                                                                                                                                                                                                                                                                                                                                                                                                                      |
| Risk of bias in individual studies | 14  | To assess the risk of bias of all articles selected, the methodological quality criteria, Mixed-Methods Appraisal Tool (MMAT), version 2018 will be conducted using.                                                                                                                                                                                                                                                                                                                                                                                                                                                                                                                                                                                                                                |
| Data synthesis                     | 15  | We will use a convergent integrated approach in accordance with Joanna Briggs Institute (JBI) methodology for conducting a mixed-methods systematic review. In the first part, synthesize qualitative data by means of thematic synthesis using JBI-QARI software systems. Part two, synthesis quantitative data and perform meta-analysis. Statistical analysis will be conducted using Revman 5.3. P(Proportion) and SE(Standard Erro) will be used to analyze the incidence of anxiety, depression, insomnia and infection. The next step is data transformation. In a final step, extract themes and subtopics in shape of qualified textual description from qualitative results, whether untransformed or transformed, and collate and categorise them according to consistencies of content. |

|                                                                                                                                                                                                                            |                                   |    |                                                                                                                                                                                                                                                                                                                                                                                                                                                                                                                                                                                                                                                                                                                                                                                                                                                     |
|----------------------------------------------------------------------------------------------------------------------------------------------------------------------------------------------------------------------------|-----------------------------------|----|-----------------------------------------------------------------------------------------------------------------------------------------------------------------------------------------------------------------------------------------------------------------------------------------------------------------------------------------------------------------------------------------------------------------------------------------------------------------------------------------------------------------------------------------------------------------------------------------------------------------------------------------------------------------------------------------------------------------------------------------------------------------------------------------------------------------------------------------------------|
| 1<br>2<br>3<br>4<br>5<br>6<br>7<br>8<br>9                                                                                                                                                                                  | Meta-bias(es)                     | 16 | Results will be reported as proportions with corresponding 95% confidence intervals (CIs). Between-study heterogeneity will be assessed using the T2 test on Cochrane's Q statistic, 20 and quantified by calculating the I2 statistic (with values of 25%, 50%, and 75% is representative of the low, medium, and high heterogeneity, respectively). There will be a methodological heterogeneity between studies included in this study because different scales are used to evaluate anxiety and depression. We will used a random-effects meta-analysis to estimate the anxiety, depression, insomnia and coronavirus infected among medical staff. The presence of publication bias will be assessed using Egger's test and funnel plots. Pvalue < 0.10 on the Egger's test will be considered statistically significant for publication bias. |
| 10<br>11<br>12<br>13<br>14<br>15<br>16<br>17<br>18<br>19<br>20<br>21<br>22<br>23<br>24<br>25<br>26<br>27<br>28<br>29<br>30<br>31<br>32<br>33<br>34<br>35<br>36<br>37<br>38<br>39<br>40<br>41<br>42<br>43<br>44<br>45<br>46 | Confidence in cumulative evidence | 17 | In order to determine the strength of gathered evidence, the 2010 JBI quality level of evidence and grade of recommendation will be used. It helps us to evaluate the quality of evidence in the domains of feasibility, appropriateness, meaning, effectiveness and economy by dividing the quality assessment into four grades, the recommended strength into a, b, c three grades.                                                                                                                                                                                                                                                                                                                                                                                                                                                               |

# BMJ Open

## The experiences and impacts of health-care providers during the Coronavirus pandemic: protocol for a mixed methods systematic review

|                                 |                                                                                                                                                                                                                                                                                                                                     |
|---------------------------------|-------------------------------------------------------------------------------------------------------------------------------------------------------------------------------------------------------------------------------------------------------------------------------------------------------------------------------------|
| Journal:                        | <i>BMJ Open</i>                                                                                                                                                                                                                                                                                                                     |
| Manuscript ID                   | bmjopen-2020-043686.R1                                                                                                                                                                                                                                                                                                              |
| Article Type:                   | Protocol                                                                                                                                                                                                                                                                                                                            |
| Date Submitted by the Author:   | 01-Dec-2020                                                                                                                                                                                                                                                                                                                         |
| Complete List of Authors:       | Xu, Na; Xi'an Jiaotong University, Health Science Center<br>Lv, AiLi; Xi'an Jiaotong University<br>Li, TianZi; Xi'an Jiaotong University, Health Science Center<br>Li, XiaoFeng; Tongji University Tenth People's Hospital<br>Huang, Mei; Air Force Medical University, Department of Nursing<br>Su, Yan; Xi'an Jiaotong University |
| <b>Primary Subject Heading</b>: | Health services research                                                                                                                                                                                                                                                                                                            |
| Secondary Subject Heading:      | Epidemiology, Global health, Infectious diseases, Mental health, Qualitative research                                                                                                                                                                                                                                               |
| Keywords:                       | COVID-19, Health & safety < HEALTH SERVICES ADMINISTRATION & MANAGEMENT, EPIDEMIOLOGY, Health policy < HEALTH SERVICES ADMINISTRATION & MANAGEMENT, Anxiety disorders < PSYCHIATRY, Depression & mood disorders < PSYCHIATRY                                                                                                        |
|                                 |                                                                                                                                                                                                                                                                                                                                     |

SCHOLARONE™  
Manuscripts

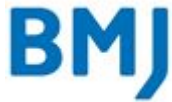

I, the Submitting Author has the right to grant and does grant on behalf of all authors of the Work (as defined in the below author licence), an exclusive licence and/or a non-exclusive licence for contributions from authors who are: i) UK Crown employees; ii) where BMJ has agreed a CC-BY licence shall apply, and/or iii) in accordance with the terms applicable for US Federal Government officers or employees acting as part of their official duties; on a worldwide, perpetual, irrevocable, royalty-free basis to BMJ Publishing Group Ltd ("BMJ") its licensees and where the relevant Journal is co-owned by BMJ to the co-owners of the Journal, to publish the Work in this journal and any other BMJ products and to exploit all rights, as set out in our [licence](#).

The Submitting Author accepts and understands that any supply made under these terms is made by BMJ to the Submitting Author unless you are acting as an employee on behalf of your employer or a postgraduate student of an affiliated institution which is paying any applicable article publishing charge ("APC") for Open Access articles. Where the Submitting Author wishes to make the Work available on an Open Access basis (and intends to pay the relevant APC), the terms of reuse of such Open Access shall be governed by a Creative Commons licence – details of these licences and which [Creative Commons](#) licence will apply to this Work are set out in our licence referred to above.

Other than as permitted in any relevant BMJ Author's Self Archiving Policies, I confirm this Work has not been accepted for publication elsewhere, is not being considered for publication elsewhere and does not duplicate material already published. I confirm all authors consent to publication of this Work and authorise the granting of this licence.

## Review

### **The experiences and impacts of health-care providers during the Coronavirus pandemic: protocol for a mixed methods systematic review**

Na Xu <sup>1</sup>, Aili Lv <sup>1\*</sup>, Tianzi Li <sup>1</sup>, Xiaofeng Li <sup>2</sup>, Mei Huang <sup>3</sup>, Yan Su <sup>1</sup>

<sup>1</sup> Health Science Center, Xi'an Jiaotong University, Xi'an, (Shaan Xi,) China

<sup>2</sup> Tongji University Tenth People's Hospital, Shang Hai, China

<sup>3</sup> Department of Nursing, Air Force Medical University, Xi'an, (Shaan Xi,) China

\*Corresponding Author

Aili Lv

Health Science Center

Xi'an Jiaotong University

No.76 Yanta West Road

Xi'an, Shaan Xi, 710061, China

Tel: 13709209696

Fax:029-82657015

1  
2  
3  
4 E-mail: aili@mail.xjtu.edu.cn  
5  
6  
7

8 Na Xu<sup>1</sup> E-mail: xuna5220@stu.xjtu.edu.cn  
9

10 AiLi Lv<sup>1</sup> E-mail: aili@mail.xjtu.edu.cn  
11  
12

13 TianZi Li<sup>1</sup> E-mail: 2662828124@qq.com  
14

15 XiaoFeng Li<sup>2</sup> E-mail: 2383307590@qq.com  
16  
17

18 Mei Huang<sup>3</sup> E-mail: huangmei\_1995@163.com  
19

20 Yan Su<sup>1</sup> E-mail: 3293679480@qq.com  
21  
22  
23  
24  
25  
26  
27  
28  
29  
30  
31  
32  
33  
34  
35  
36  
37  
38  
39  
40  
41  
42  
43  
44  
45  
46  
47  
48  
49  
50  
51  
52  
53  
54  
55  
56  
57  
58  
59  
60

## Abstract

**Introduction:** Frontline health-care providers are redeployed to areas outside their clinical expertise and assigned high-loading workload to address the surge of patients with each coronavirus outbreaks. Their importance in crisis is not in doubt. However, they experienced considerable physical distress and psychological stressors, even leading to psychological illness and infection in this environment. There is an urgent need to accurately, comprehensively and objectively understand their experiences, perceptions and current situation of burnout, PTSD, anxiety, depression, insomnia and coronavirus infection. Therefore, this protocol is to conduct a mixed methods systematic review to summarize the evidence on the experiences of health-care providers and impacts on their psychological and infection during the coronavirus pandemics.

**Methods:** Published studies on experience, perspective, impact, burnout, PTSD, anxiety, depression, insomnia, and infection of health-care providers with SARS, MERS, and COVID-19 and written in English and Chinese will be accepted. Databases (MEDLINE, EMBASE, CENTRAL, Web of Science, PubMed, PsycINFO, WanFang, and SinoMed) from inception until 30 July 2020 will be searched. Two reviewers will select, screen, extract data, and assess the risk of bias independently. Risk of bias of results will be using the MMAT. Using a convergent integrated approach on qualitative/quantitative studies, we will synthesize qualitative and quantitative data separately. The incidence and number of cases about burnout, PTSD, anxiety, depression, insomnia and coronavirus infected among medical staff will be extracted. Then we will transform quantitative data to synthesise narratively findings. This protocol will be reported per the PRISMA-P guidelines.

**Ethics and dissemination:** Ethical assessment is not required due to the nature of the proposed systematic review. Findings of our research will be disseminated at conferences related to this field and through publication in peer-reviewed journals.

**PROSPERO registration number:** CRD42020198506.

### **Strengths and limitations of this study:**

1) This is the first mixed methods systematic review that assessing the experience and impact of health-care providers during the coronavirus outbreak.

2) We will comprehensive understand that the health-care providers' real experiences and impacts when their lives and security are threatened. This is also stronger evidence in clinical practice of

1  
2  
3  
4 31 sustained and comprehensive support policies and measures adopted to improve their physical and  
5  
6 32 mental feelings and health.  
7

8 33 3) This study will include only English and Chinese, and similar topics in other languages were  
9  
10 34 ignored.  
11

12 35 4) The type of research included in the study is limited by the type of published original research. And  
13  
14 36 the definition of first-line health care workers is non-standardised.  
15

16  
17 37 **Abbreviations:** PTSD: Post-Traumatic Stress Disorder; SARS: Severe Acute Respiratory Syndrome;  
18  
19 38 MERS: Middle East Respiratory Syndrome; COVID-19: Coronavirus Disease 2019; MMAT:  
20  
21 39 Mixed-Methods Appraisal Tool; PRISMA-P: Preferred Reporting Items for Systematic reviews and  
22  
23 40 Meta-Analysis protocol  
24  
25  
26  
27  
28  
29  
30  
31  
32  
33  
34  
35  
36  
37  
38  
39  
40  
41  
42  
43  
44  
45  
46  
47  
48  
49  
50  
51  
52  
53  
54  
55  
56  
57  
58  
59  
60



## 41 Introduction

42 Coronaviruses are a kind of single-stranded, positive-sense RNA viruses with envelope  
43 nonsegmented, which exists in nature widely<sup>[1]</sup>. This host-specific viruses infect other  
44 mammals, birds and even humans frequently, and lead to diverse clinical syndromes in  
45 humans, including respiratory, digestive, liver, and neurological disorders<sup>[2]</sup>. Two of the six  
46 coronaviruses that have been identified, Sever Acute Respiratory Syndrome Coronavirus  
47 (SARS-CoV) and Middle East Respiratory Syndrome Coronavirus (MERS-CoV), are  
48 characterized by zoonosis and highly pathogenic, increasing the risk of deaths<sup>[3]</sup>.

49 Coronavirus of highly pathogenic has been spread in humans for hundreds of years through  
50 contact, droplets, aerosols, etc. The number of deaths due to infection SARS-CoV 2-4 and  
51 MERS-CoV far exceeded 10,000 in the past two decades<sup>[4]</sup>. Every outbreak of coronavirus  
52 has a tremendous impact on human life and health. World Health Organization (WHO)  
53 confirmed 8098 cases and 774 (9.6%) deaths during the Sever Acute Respiratory  
54 Syndrome(SARS) outbreak in 2002. Similarly, 2494 infections and 34.4% deaths were  
55 confirmed during the Middle East Respiratory Syndrome(MERS) epidemic from 2012 to  
56 2018. Because of the high infection rate and wide spread, coronaviruses infecting poses a  
57 constant threat to human health.

58 Coronavirus Disease 2019 (COVID-2019) infection is the third outbreak of coronavirus  
59 cross-species transmission of sudden public health events after SARS and MERS. First  
60 reported in late December 2019, and ongoing outbreak widespread all across the world. As of  
61 July 16, 2020, there have been 13,378,853 confirmed cases of COVID-19 globally, including  
62 580,045 deaths, already circulating in 216 countries<sup>[5]</sup>. WHO declared a state of emergency  
63 and could confront long-term challenges worldwide<sup>[6]</sup>.

1  
2  
3 64 Every outbreak of a new disease, the demand for resources, especially health-care providers  
4  
5 65 and medical supplies, has increased greatly around the world. In order to resolve this situation,  
6  
7  
8 66 most hospitals have to rapidly reconfigure clinical spaces and restructure clinical teams.  
9  
10 67 Therefore, many health-care providers are redeployed to areas outside their clinical expertise  
11  
12 68 and are assigned high-loading workload to address the surge of patients with COVID-19. The  
13  
14  
15 69 importance of health-care providers in this crisis is not in doubt<sup>[6]</sup>. Their health and safety can  
16  
17 70 affect the effectiveness of patients' treatment and care, and can even determine the control of  
18  
19 71 any outbreak<sup>[7]</sup>. However, they also face great challenges<sup>[8]</sup>.

22  
23 72 Health-care providers experienced considerable physical distress when working with patients  
24  
25 73 diagnosed with SARS, MERS, and COVID-19<sup>[9, 10]</sup>. They were exhausted owing to the  
26  
27  
28 74 intensive care they provided during long shifts in protective suits without toilet breaks. The  
29  
30  
31 75 combination of heavy protective clothing and the hot environmental conditions made  
32  
33 76 awkward for them to move, difficult to breathe, hard to hear, and covered with sweat they  
34  
35  
36 77 were unable to wipe off<sup>[11]</sup>.

38  
39 78 Health-care providers also experienced significant psychological stressors. Recent evidence  
40  
41  
42 79 suggests that even someone who is non-symptomatic can spread COVID-19 with high  
43  
44  
45 80 efficiency. At the same time, little was known about the new virus, including its lethality or  
46  
47 81 how to best care for these patients<sup>[12]</sup>. And they always witness the death of infected people.  
48  
49  
50 82 Hence, they experienced fear of getting infected themselves and spreading infection to their  
51  
52 83 family members. The families, neighbors and community residents who fear exposing  
53  
54  
55 84 themselves<sup>[13, 14]</sup> were tried to prevent the medical staff from going home after finishing work,  
56  
57  
58 85 which makes the staff socially stressed. Moreover, some environmental stress, such as

1  
2  
3  
4 86 cultural differences of medical staff between different regions, lack of supplies, temporary  
5  
6 87 workplaces, raised the health-care workers' sense of helplessness and frustration<sup>[15]</sup>.  
7  
8

9 88 It is worth noting that health care professionals who take care of patients with coronavirus are  
10  
11 89 more prone to psychological disorders and illnesses among, such as burnout, PTSD  
12  
13 90 (Post-Traumatic Stress Disorder), anxiety, depression, insomnia. Stress reaction symptoms have  
14  
15 91 been reported in about 10% of healthcare workers in the course and in the aftermath of  
16  
17 92 previous outbreaks of SARS and MERS<sup>[16,17]</sup>. Similar challenges have arisen in United States,  
18  
19 93 Canada, Taiwan and Hong Kong<sup>[18-22]</sup>. In a cross-sectional survey of 1257 health-care  
20  
21 94 workers in China during the COVID-19 pandemic, over 70% reported distress, with 50%  
22  
23 95 reporting depression and 34% insomnia was reported<sup>[23]</sup>. But the unexpected findings of one  
24  
25 96 study suggest that the frequency of burnout is significantly smaller in frontline workers than  
26  
27 97 that of healthcare providers in their usual ward<sup>[24]</sup>.  
28  
29  
30  
31

32 98 In addition, health professionals have become the most vulnerable population to contract the  
33  
34 99 coronavirus virus. Earlier studies reported that infected health care providers accounted for  
35  
36 100 51% of the SARS cases<sup>[25]</sup>. However the prevalence of infection with COVID-19 among  
37  
38 101 healthcare workers was only 6% in Netherlands<sup>[26]</sup>. Similarly, on February 7 the proportion of  
39  
40 102 Chinese medical staff was infected growth of 26% for 2020, up from 3% on January 1, 2020  
41  
42 103 [27,28].  
43  
44  
45  
46

47 104 Although many studies have reported psychological changes and incidence of coronavirus  
48  
49 105 infection among medical staff, the sample size of studies is different and the results exist  
50  
51 106 visible differences. Therefore, there is an urgent need for a systematic review of quantitative  
52  
53 107 research to accurately and objectively understand the current situation of psychology and  
54  
55 108 coronavirus infection for health-care providers in their the industry during outbreaks.  
56  
57  
58  
59  
60

1  
2  
3 109 However, some of the studies found that health-care providers showed great strength and  
4  
5 110 resilience in the face of various challenges. Meanwhile, they had an extraordinary sense of  
6  
7  
8 111 responsibility and a strong spirit of teamwork when treating patients with coronavirus<sup>[23]</sup>.  
9

10 112 Several studies have discussed the experience of health care providers in the face of the  
11  
12 113 epidemic. In this case, systematic review of qualitative study can improve the reliability,  
13  
14 114 generality and policy reference of qualitative research results. In this way, the experiences or  
15  
16 115 perceptions of medical staff are more comprehensively described during an outbreak.  
17  
18

19  
20 116 The main aim of the present protocol is to conduct a mixed methods systematic review to  
21  
22 117 summarize the evidence on the experiences of health-care providers and impacts on their  
23  
24 118 psychological and infection during the coronavirus pandemics.  
25  
26

## 27 28 119 **Methods**

### 29 30 31 120 *Protocol registration*

32  
33  
34 121 This mixed methods systematic review is reported according to Preferred Reporting Items for  
35  
36 122 Systematic reviews and Meta-Analysis protocol (PRISMA-P) guidelines<sup>[29]</sup>. The protocol has  
37  
38 123 been registered in the International Prospective Register of Systematic Review (PROSPERO)  
39  
40 124 (CRD 42020198506, <https://www.crd.york.ac.uk>).  
41  
42  
43

### 44 45 125 *Patient and public involvement*

46  
47 126 This is a systematic review studies and therefore there not require patients and/or public  
48  
49 127 involvement.  
50  
51

### 52 53 128 *Design*

54  
55  
56 129 The mixed methods systematic review incorporating quantitative and qualitative data is  
57  
58 130 conducted. The qualitative component is undertaken firstly to comprehensively explore the  
59  
60

1  
2  
3 131 experience and impact of health providers during the coronavirus pandemic. Then the  
4  
5 132 quantitative component of the psychological status and infected condition of caregivers is  
6  
7 133 used to generalize or prove the qualitative results that caregivers are significantly affected  
8  
9 134 during outbreaks. And this review using the convergent integrated approach in which data is  
10  
11 135 transformed in such a way that quantitative transformed in qualitative topics to description  
12  
13 136 and the synthesis of quantitative and qualitative studies results simultaneously<sup>[30]</sup> (see **Figure**  
14  
15 137 **1** for design process).

16  
17  
18  
19  
20  
21 138 *(Insert Figure 1 about here.)*

### 22 23 24 139 **Data Sources and Searches**

25  
26 140 The literature searches have been conducted in electronic bibliographic databases, including  
27  
28 141 MEDLINE, EMBASE, the Cochrane Library (CENTRAL), Web of Science, PubMed,  
29  
30 142 Psychology Information (PsycINFO), Wan Fang data, and SinoMed, from inception until 30  
31  
32 143 July 2020.

33  
34  
35  
36  
37 144 An initial search of PubMed has consulted the original research and review, followed by the  
38  
39 145 identification of keywords found in each title and abstract. Enter these keywords into  
40  
41 146 “Medical terms (MeSH)” box for Advanced Search in the Cochrane library, further search  
42  
43 147 more synonymous terms. After that, add terms through 10 registered unpublished protocols of  
44  
45 148 the systematic review in PROSPERO. Ultimately, the following searching terms in **Table 1**  
46  
47 149 are used to perform the search. The search terms will be used a combination of MeSH terms,  
48  
49 150 free-text words, and Boolean operators. The reference section of the included studies will be  
50  
51 151 hand-searched for additional relevant studies. The detailed search strategy in PubMed is  
52  
53 152 shown in the **PDF** document (see online supplementary additional file 1).

**Table 1 Searching Terms**

| Entries                                                                                                                    |                                       | Theme                                                            | Search Terms                                                                                                                                                                                                                                                                                                                                                                                                                                                                                                                                                                              |
|----------------------------------------------------------------------------------------------------------------------------|---------------------------------------|------------------------------------------------------------------|-------------------------------------------------------------------------------------------------------------------------------------------------------------------------------------------------------------------------------------------------------------------------------------------------------------------------------------------------------------------------------------------------------------------------------------------------------------------------------------------------------------------------------------------------------------------------------------------|
| #1                                                                                                                         | participants                          | health-care providers                                            | (Healthcare Provider) OR (Healthcare Worker) OR (Health Care Provider) OR (health personnel) OR (health professional) OR (Medical staff) OR (Medical worker) OR (Physician) OR (Clinician) OR (Doctor) OR (Nurse) OR (Nursing Staff) OR (Healthcare employee) OR (Paramedic)                                                                                                                                                                                                                                                                                                              |
| #2                                                                                                                         | Phenomenon/<br>outcome of<br>interest | experience and<br>impact                                         | Experience OR perception OR Attitude OR Opinion OR Impact OR Affect OR Emotion OR Mood OR Mental OR (Burn out) OR Burnout OR Burn-out OR (Stress Disorders, Post-Traumatic) OR (Post Traumatic Stress Disorder) OR (Post-Traumatic Stress Disorder) OR (Posttraumatic Stress Disorder) OR PTSD OR (Stress Psychological) OR (Psychological Distress) OR (Affective Symptoms) OR Suffering OR anxiety OR Nervousness OR depression OR insomnia OR (sleep disorder) OR (stress levels) OR infection OR incidence OR morbidity                                                               |
| #3                                                                                                                         | Context                               | Coronavirus                                                      | Coronavirus OR COVID-19 OR SARSCOV2 OR 2019-nCov OR (covid19 Ncov) OR (2019 coronavirus) OR (novel coronavirus) OR (new coronavirus) OR (nouveau coronavirus) OR (COVID19) OR (2019-severe acute respiratory syndrome coronavirus 2) OR (SARS-2) OR (Wuhan seafood market pneumonia virus) OR (SARS) OR SARS-CoV OR (SARS VIRUS) OR (severe acute respiratory syndrome) OR (MERS) OR (MERS-VIRUS) OR (Middle East Respiratory Syndrome) OR (Middle East respiratory syndrome related coronavirus) OR (MERS-CoV)                                                                           |
| #4                                                                                                                         | Types of<br>studies                   | cross-sectional,<br>cohort studies<br>and qualitative<br>studies | (cohort study) OR (Incidence Study) OR (Cohort Analysis) OR (Cohort Analyses) OR (Concurrent Study) OR (Closed Cohort Study) OR (Historical Cohort Study) OR (Prevalence Study) OR (Disease Frequency Survey) OR (Cross-Sectional) OR (Cross Sectional) OR (Empirical Research) OR (qualitative study) OR (qualitative Research) OR (Qualitative description) OR (phenomenological study) OR (Grounded Theory) OR (ethnography) OR ( Anthropology) OR (Behavioral Research) OR (action research) OR (mixed method) OR (mixed-method) OR (Investigative research) OR (Investigative study) |
| Number of articles #1=1,811,427 #2=10,519,278 #3=73,347 #4=6,302,298 #1 AND #2 AND #3 AND #4=2380<br>(31 July 2020-PubMed) |                                       |                                                                  |                                                                                                                                                                                                                                                                                                                                                                                                                                                                                                                                                                                           |

## **Inclusion and exclusion criteria**

Only published studies are original articles, and studies that reported the experience, perspective, burnout, PTSD, anxiety, depression, insomnia, and infection rates of health-care providers who took care of patients with SARS, MERS, and COVID-19 will be accepted in this study. For language restrictions, only studies in English and Chinese will be accepted.

### ***Types of participants***

This review will include studies where participants are health-care providers who treat and cure the patients diagnosed with coronavirus infection, working in designated hospital and having a close contact with infected patients. The gender, age and major field of participants will not be limited. But medical students or trainees will be excluded.

### ***Phenomenon of interest***

Our phenomenon of interest will focus on studies that the experience, perspective and impact of health-care providers who took care of patients will be all considered in qualitative review. The term “experience” and “perspective” consisted of all factors impact on the feeling and mood of providers from coronavirus. The “impact” defined as that health-care providers perceive the impact by themselves, whether physical or psychological or lifestyle habits.

### ***Outcome of interest***

This review will consider quantitative studies that the impact of physical and mental health of health-care providers during the SARS, MERS, and COVID-19 pandemic. The quantitative outcomes will include the two subsystems. One is included proportions, prevalence and counts of psychological distress and illness (including the incidence of burnout, PTSD, anxiety, depression, insomnia), and the other one is the incidence and number of coronavirus

1  
2  
3 176 infection. The results must include one or more the outcomes. The measurement tool must be  
4  
5 177 an international scale, and a self-made scale will not be considered.  
6  
7  
8

9 178 ***Context***

10  
11 179 This review will consider studies that were in the context of a pandemic caused by  
12  
13  
14 180 coronavirus, including SARS, MERS, and COVID-19. Coronavirus diagnosis was in  
15  
16 181 accordance with the World Health Organization.  
17  
18

19  
20 182 ***Types of studies***

21  
22 183 We will include studies that use quantitative (including cross-sectional, cohort studies),  
23  
24 184 qualitative (including but not limited to, designs such as phenomenology, grounded theory,  
25  
26 185 ethnography, action research, qualitative description) and mixed-methods methodologies. We  
27  
28 186 will exclude case reports and articles, such as conference abstracts, editorials, letters, reviews  
29  
30 187 and commentaries. Systematic reviews and meta-analyses will not be included, but we will be  
31  
32 188 looking for articles in the systematic review or other types of review in order to identify more  
33  
34 189 articles for this systematic review.  
35  
36  
37  
38  
39

40 190 ***Exclusion criteria***

41  
42 191 Studies that did not report incidence rate of burnout, PTSD, anxiety, depression or infection  
43  
44 192 rates for health-care providers in pandemics, and studies that didn't state the number of  
45  
46 193 patients will be excluded. Studies that analysed mental and behavioural disorders due to the  
47  
48 194 use of an existing primary disease, alcohol and other drugs will not be included. Studies that  
49  
50 195 measure burnout, PTSD, anxiety, depression and insomnia but do not use the universal  
51  
52 196 international scale will be excluded.  
53  
54  
55  
56

57  
58 197 **Data collection and analysis**



1  
2  
3  
4 198 ***Data management***  
5

6 199 Covidence systematic review management software, EndNote X9, will be used to assist with  
7  
8 200 further data management<sup>[31]</sup>. All identified references following the search will be uploaded  
9  
10 and collated into EndNote and duplicates will be removed from the list.  
11  
12

13  
14  
15 202 ***Selection of studies***  
16

17 203 In phase one, the title and the abstract of each identified study will be independently screened  
18  
19 204 according to the established inclusion criteria by each of the two review authors (NX and TL)  
20  
21 205 to determine which should be assessed further. Full-texts for the eligible titles and/or  
22  
23 206 abstracts including those uncertain will be obtained for further assessment on whether to  
24  
25 207 include in the study or not at the second stage.  
26  
27

28  
29 208 In order for two reviewers to use consistent evaluation criteria for all retrieved results, we  
30  
31 209 will conduct step-by-step calibration exercises for 30 studies before screening<sup>[32]</sup>. In case  
32  
33 210 80% agreement is not reached, we will refine the inclusion and exclusion criteria and the  
34  
35 211 calibration will be repeated until the threshold is reached. Disagreement between the two  
36  
37 212 authors will be resolved through discussion and when needed there will be arbitration by a  
38  
39 213 third reviewer(MH). Reasons for excluding full-text studies will be recorded.  
40  
41  
42  
43

44 214 ***Data extraction***  
45

46  
47 215 A standardised form based on previous studies<sup>[33-35]</sup> will be used for data extraction. The form  
48  
49 216 will be created by using a specially developed tool in a Microsoft Excel (2016) spreadsheet.  
50  
51 217 In this systematic review the key data to be extracted as follows.  
52  
53

54 218 Research information: first author, year of publication, country of the study; Demographic  
55  
56 219 information: populations(doctors, nurses and others), hospital level, sample size, age;  
57  
58  
59  
60

1  
2  
3 220 Qualitative studies: study methods, contexts, culture, and interest outcomes(the experiences,  
4  
5 221 perspectives and impacts of health-care providers); Quantitative studies: study design will be  
6  
7  
8 222 extracted. The incidence, proportions or prevalence and number of cases about burnout,  
9  
10 223 PTSD, anxiety, depression, insomnia and coronavirus infected among medical staff will be  
11  
12 224 extracted.

13  
14  
15 225 The extracted information from each paper will be checked for congruency and agreement by  
16  
17 226 two reviewers. If additional information or data are required, we will contact the authors of  
18  
19 227 the original studies through email for clarification or addition.  
20  
21  
22

### 23 228 ***Data synthesis and integration***

24  
25  
26 229 We will use a convergent integrated approach in accordance with Joanna Briggs Institute (JBI)  
27  
28 230 methodology for conducting a mixed-methods systematic review<sup>[35]</sup>.

29  
30  
31 231 In the first part, synthesize qualitative data by means of thematic synthesis using JBI-QARI  
32  
33 232 software systems. Under the premise of understanding the philosophical thought and  
34  
35 233 methodology of various qualitative studies, two reviewers(NX and TL) repeatedly read,  
36  
37 234 understand, analyze and explain the experiences, perspectives and impacts of medical  
38  
39 235 workers, and combine similar results to form new categories. Then, the new categories are  
40  
41 236 summed up as an integrated result to form new concepts or interpretations. Two reviewers  
42  
43 237 will independently analyse the extracted data and provide thematic codes. In order to derive a  
44  
45 238 matrix structure, both reviewers will discuss coding and identify thematic issues and  
46  
47 239 categories.  
48  
49  
50

51  
52  
53 240 Part two, synthesis quantitative data and perform meta-analysis. Statistical analysis will be  
54  
55 241 conducted using Revman 5.3. P(Proportion) and SE(Standard Error) will be used to analyze  
56  
57 242 the incidence of burnout, PTSD, anxiety, depression, insomnia and infection. Between-study  
58  
59  
60

1  
2  
3  
4 243 heterogeneity will be assessed using the  $\chi^2$  test on Cochrane's Q statistic, and quantified by  
5  
6  
7 244 calculating the  $I^2$  statistic (with values of 25%, 50%, and 75% is representative of the low,  
8  
9 245 medium, and high heterogeneity, respectively). There will be a methodological heterogeneity  
10  
11 246 between studies included in this study because different scales are used to evaluate. We will  
12  
13 247 use a random-effects meta-analysis to estimate the burnout, PTSD, anxiety, depression,  
14  
15 248 insomnia and coronavirus infected among medical staff. Results will be reported as  
16  
17 249 proportions with corresponding 95% confidence intervals (CIs) (n% [95%CI(a%,b%)]).

20  
21 250 The next step is data transformation<sup>[34]</sup>. According to the JBI convergent integrated approach,  
22  
23 251 quantitative data will be converted to "qualitative data" and be transfigured to textual or  
24  
25 252 narrative interpretations to answer the review question.

26  
27  
28  
29 253 In a final step, extract themes and subtopics in shape of qualified textual description from  
30  
31 254 qualitative results, whether untransformed or transformed, and collate and categorise them  
32  
33 255 according to consistencies of content. These categories will then be subjected to a synthesis  
34  
35 256 to produce a single comprehensive set of synthesized findings that can be used as a basis for  
36  
37 257 evidence-based practice.

### 41 258 ***Subgroup analysis***

42  
43  
44 259 The doctors, nurses and other medical staffs are all working together to combat the  
45  
46 260 coronavirus pandemic, but they have different duties and their experience may vary from  
47  
48 261 each other. Hence, we plan to conduct subgroup analyses to examine whether a profession  
49  
50 262 has different experiences and impacts. For qualitative data, we will label the results of articles  
51  
52 263 that are only included in a class of research objects when extracting the results of qualitative  
53  
54 264 studies. If the experience of different occupations is the same, we will integrate the results  
55  
56 265 and not report according to different occupations. If people in different occupations do have  
57  
58  
59  
60

1  
2  
3 266 differences in experience and experience, we will report it in the results. For quantitative data,  
4  
5 267 the subgroup analysis of different occupations (doctors, nurses and other medical workers)  
6  
7  
8 268 can be performed using a mixed effect model to reduce the heterogeneity of the study and to  
9  
10 269 distinguish the psychological and infection conditions of different occupations during the  
11  
12 270 outbreak of the epidemic.

13  
14  
15 271 Moreover, in order to reduce the heterogeneity across Quantitative studies, the subgroup  
16  
17 272 analysis could classify countries by economic income group according to the World Bank list  
18  
19 273 of Economies (High income/Upper middle income/Lower middle income)<sup>[36,37]</sup>. And we also  
20  
21 274 try to do subgroup analysis by gender(Female/Male) and measuring instrument(various scales  
22  
23 275 and equipment) if data allows.

### 26 27 *Sensitivity analysis*

28  
29  
30 277 If the available data allows, we will conduct the sensitivity analyses that exclude studies at  
31  
32 278 high risk of bias in order to determine its impact.

### 33 34 35 36 37 *Assessment of reporting biases*

38  
39 280 The presence of publication bias will be assessed using Egger's test and funnel plots. Pvalue  
40  
41 281 < 0.10 on the Egger's test will be considered statistically significant for publication bias.

### 42 43 44 45 46 47 **Assessment of risk and quality**

#### 48 49 50 51 52 *Assessment of risk of bias in included studies.*

53 284 To assess the risk of bias and quality of all articles selected, the methodological quality  
54  
55 285 criteria, Mixed-Methods Appraisal Tool (MMAT), version 2018 will be conducted using<sup>[38]</sup>.  
56  
57 286 This document comprises two parts: checklist (Part I) and explanation of the criteria (Part II).  
58  
59 287 Each part is divided into 5 smaller sections according to the category of research designs, and  
60

1  
2  
3 288 each category includes 5 items respectively. All items from the MMAT will be rated as “Yes”,  
4  
5 289 “No” or “Can’t tell”<sup>[39]</sup>.  
6  
7

8 290 Whereby one reviewer (NX) will apply the MMAT criteria and a second reviewer (TL) will  
9  
10 291 verify the assessments independently. Any disputes will be resolved through discussion or a  
11  
12 292 third reviewer (MH). Regardless of the research quality, all studies will undergo extraction  
13  
14 293 and synthesis where possible.  
15  
16  
17

### 18 19 294 *Assessing confidence in the findings*

20  
21 295 In order to determine the strength of gathered evidence, the CERQual (Confidence in the  
22  
23 296 Evidence from Reviews of Qualitative Research) approach will be used<sup>[40]</sup>. The CERQual  
24  
25 297 approach is based on four aspects: (1) methodological limitations component, (2) relevance  
26  
27 298 component, (3) coherence component and (4) adequacy component. Synthesizing the  
28  
29 299 evaluation results of four parts, the confidence in the evidence for each review finding was  
30  
31 300 assessed as high, moderate, low or very low.  
32  
33  
34  
35

### 36 37 301 **Timeline for review**

38  
39 302 At the time of submitting this protocol, we have completed the electronic searches and  
40  
41 303 piloted the study selection process. This systematic review is scheduled to finish in July 2021.  
42  
43  
44

### 45 304 **Discussion**

46  
47 305 This protocol was registered and reported according to Preferred Reporting Items for  
48  
49 306 Systematic reviews and MetaAnalysis protocol (PRISMA-P) guidelines. The PRISMA flow  
50  
51 307 diagram in **Figure 2** will be used to record the review process in different phases<sup>[41]</sup>.  
52  
53  
54  
55

56 308 *(Insert Figure 2 about here.)*  
57  
58  
59  
60

1  
2  
3 309 Healthcare providers face a variety of unpredictable challenges in caring for infected patients  
4  
5 310 in the context of coronavirus outbreaks. To our knowledge, there are few systematic reviews  
6  
7 311 that will assess the experience and impact of health-care providers during the coronavirus  
8  
9 312 outbreak. Comprehensive understanding of what their real experiences and impacts are will  
10  
11 313 have a significant meaningful when their lives and security are threatened. Meanwhile, this is  
12  
13 314 also stronger evidence in clinical practice of sustained and comprehensive support measures  
14  
15 315 to health care providers. Findings from this review will be shared in conferences, peer-review  
16  
17 316 journals, and social media platforms.  
18  
19  
20  
21  
22

### 23 317 **Ethics and dissemination**

24  
25 318 Ethical assessment is not required due to the nature of the proposed systematic review.  
26  
27 319 Findings of our research will be disseminated at conferences related to this field and through  
28  
29 320 publication in peer-reviewed journals.  
30  
31  
32

### 33 321 **Statements**

### 34 322 **Acknowledgement**

### 35 323 **Competing interests**

36  
37 324 The authors have no conflicts of interest to declare.  
38  
39  
40  
41  
42

### 43 325 **Funding**

44  
45 326 The authors have not declared a specific grant for this research from any funding agency in  
46  
47 327 the public, commercial or not-for-profit sectors.  
48  
49  
50  
51  
52  
53  
54  
55  
56  
57  
58  
59  
60

1  
2  
3  
4 328 **Authors' contributions**  
5

6 329 NX and AL conceived and designed the initial study. NX and TL drafted the initial protocol.  
7  
8  
9 330 XL, MH and YS were responsible for the revision of the draft and provided general advice on  
10  
11 331 the protocol. All authors contributed to the development of the selection criteria, the risk of a  
12  
13 332 bias assessment strategy, and data extraction criteria. AL is the guarantor of the review. All  
14  
15 333 authors read, provided feedback, and approved the final protocol before submission to the  
16  
17 334 journal.  
18  
19  
20  
21 335  
22  
23

24 336 Figure 1. The design process of Systematic review.  
25  
26

27 337 Figure 2. Flow chart diagram will be showed the selection of articles for systemic review.  
28  
29  
30  
31  
32  
33  
34  
35  
36  
37  
38  
39  
40  
41  
42  
43  
44  
45  
46  
47  
48  
49  
50  
51  
52  
53  
54  
55  
56  
57  
58  
59  
60

## Reference

1. DD R, RJ W, FG H. *Clinical Virology* (4th edn). Washington: ASM Press; 2016.
2. Zhu N, Zhang D, Wang W, et al. A Novel Coronavirus from Patients with Pneumonia in China, 2019. *New England Journal of Medicine*. 2020;382(8):727-733. doi: 10.1056/NEJMoa2001017.
3. Su S, Wong G, Shi W, et al. Epidemiology, Genetic Recombination, and Pathogenesis of Coronaviruses. *Trends Microbiol*. 2016 Jun;24(6):490-502. doi: 10.1016/j.tim.2016.03.003. PubMed PMID: 27012512; PubMed Central PMCID: PMC7125511.
4. Kuiken T, Fouchier RAM, Schutten M, et al. Newly discovered coronavirus as the primary cause of severe acute respiratory syndrome. *The Lancet*. 2003;362(9380):263-270. doi: 10.1016/s0140-6736(03)13967-0.
5. WHO. Coronavirus disease (COVID-19) Pandemic World Health Organization2020. Available from: <https://www.who.int/emergencies/diseases/novel-coronavirus-2019>.
6. Xiong Y, Peng L. Focusing on health-care providers' experiences in the COVID-19 crisis. *The Lancet Global Health*. 2020;8(6):e740-e741. doi: 10.1016/s2214-109x(20)30214-x.
7. Chang D, Xu H, Rebaza A, et al. Protecting health-care workers from subclinical coronavirus infection. *The Lancet Respiratory Medicine*. 2020;8(3). doi: 10.1016/s2213-2600(20)30066-7.
8. WHO. Coronavirus disease (COVID-19) outbreak: rights, roles and responsibilities of health workers, including key considerations for occupational safety and health: World Health Organization; 2020. Available from: <https://www.who.int/docs/default-source/coronaviruse/who-rights-rolesrespon-hw-covid-19.pdf?sfvrsn=bcabd4010> (accessed April 16, 2020).
9. Chou T-L, Ho L-Y, Wang K-Y, et al. Uniformed Service Nurses' Experiences with the Severe Acute Respiratory Syndrome Outbreak and Response in Taiwan. *Nursing Clinics of North America*. 2010;45(2):179-191. doi: 10.1016/j.cnur.2010.02.008.
10. Kim Y. Nurses' experiences of care for patients with Middle East respiratory syndrome-coronavirus in South Korea. *American Journal of Infection Control*. 2018 Jul;46(7):781-787. doi: 10.1016/j.ajic.2018.01.012. PubMed PMID: WOS:000436956200014.
11. Urooj U, Ansari A, Siraj A, et al. Expectations, Fears and Perceptions of doctors during Covid-19 Pandemic. *Pakistan journal of medical sciences*. 2020 2020-May;36(COVID19-S4):S37-S42. doi: 10.12669/pjms.36.COVID19-S4.2643. PubMed PMID: MEDLINE:32582312.
12. Lee JY, Hong JH, Park EY. Beyond the fear: Nurses' experiences caring for patients with Middle East respiratory syndrome: A phenomenological study. *Journal of Clinical Nursing*. 2020. doi: 10.1111/jocn.15366. PubMed PMID: WOS:000541829500001.



13. Chen Q, Liang M, Li Y, et al. Mental health care for medical staff in China during the COVID-19 outbreak. *The Lancet Psychiatry*. 2020;7(4):e15-e16. doi: 10.1016/s2215-0366(20)30078-x.
14. HH P, CK C, CP C. Stress and coping behaviors of nurses caring for patients with SARS: an exploratory descriptive study. *Journal of Taiwan Nephrology Nursing Association* 2003;2:120–128.
15. Liu Q, Luo D, Haase JE, et al. The experiences of health-care providers during the COVID-19 crisis in China: a qualitative study. *Lancet Global Health*. 2020 Jun;8(6):E790-E798. doi: 10.1016/s2214-109x(20)30204-7. PubMed PMID: WOS:000536463500026.
16. Mak IWC, Chu CM, Pan PC, et al. Long-term psychiatric morbidities among SARS survivors. *General Hospital Psychiatry*. 2009;31(4):318-326. doi: 10.1016/j.genhosppsych.2009.03.001.
17. Bai Y, Lin C-C, Lin C-Y, et al. Survey of stress reactions among health care workers involved with the SARS outbreak. *PSYCHIATRIC SERVICES*. 2004;55(9):1055–1057. doi: 9.
18. Park BJ, Peck AJ, Kuehnert MJ, et al. Lack of SARS Transmission among Healthcare Workers, United States. *Emerging Infectious Diseases*. 2004;10(2):244-248.
19. Maunder R, Hunter J, Vincent L, et al. The immediate psychological and occupational impact of the 2003 SARS outbreak in a teaching hospital. *Canadian Medical Association Journal*. 2003; 168(10):1245-1251.
20. YC L, BC S, YY C. The mental health of hospital workers dealing with severe acute respiratory syndrome. *Psychother Psychosom*. 2006;75(6):370-375. doi: 10.1159/000095443. PubMed Central PMCID: PMC17053338.
21. Lee AM, Wong JG, McAlonan GM, et al. Stress and Psychological Distress Among SARS Survivors 1 Year After the Outbreak. *The Canadian Journal of Psychiatry*. 2007 52(4):233-240.
22. Chua SE, Cheung V, Cheung C, et al. Psychological Effects of the SARS Outbreak in Hong Kong on High-Risk Health Care Workers. *The Canadian Journal of Psychiatry*. 2004;49(6):391-393.
23. Lai J, Ma S, Wang Y, et al. Factors Associated With Mental Health Outcomes Among Health Care Workers Exposed to Coronavirus Disease 2019. *JAMA Netw Open*. 2020;3(3):3976-3988. doi: 10.1001/jamanetworkopen.2020.3976. PubMed PMID: 32202646; PubMed Central PMCID: PMC7090843.
24. Wu Y., Wang J., Luo C. A comparison of burnout frequency among oncology physicians and nurses working on the front lines and usual wards during the COVID-19 epidemic in Wuhan, China. *J pain symptom Manag*. 2020;60(1):e60–e65. doi: 10.1016/j.jpainsymman.2020.04.008
25. CM B, LM M, GA T. Clinical features and short-term outcomes of 144 patients with SARS in the greater Toronto area. *JAMA Netw Open*. 2003;289:2801–9.
26. Kluytmans-van Den Bergh MFQ, Buiting AGM, Pas SD, et al. Prevalence and Clinical Presentation of Health Care Workers With Symptoms of Coronavirus Disease 2019 in 2 Dutch Hospitals During an

- 1  
2  
3  
4 Early Phase of the Pandemic. *Jama Network Open*. 2020 May 21;3(5). doi:  
5 10.1001/jamanetworkopen.2020.9673. PubMed PMID: WOS:000537085500005.  
6  
7 27. Li Q, Guan X, Wu P, et al. Early Transmission Dynamics in Wuhan, China, of Novel Coronavirus-  
8 Infected Pneumonia. *New England Journal of Medicine*. 2020;382(13):1199-1207. doi:  
9 10.1056/NEJMoa2001316.  
10  
11 28. Wang D, Hu B, Hu C, et al. Clinical Characteristics of 138 Hospitalized Patients With 2019 Novel  
12 Coronavirus-Infected Pneumonia in Wuhan, China. *Jama*. 2020;323(11). doi:  
13 10.1001/jama.2020.1585.  
14  
15 29. Shamseer L MD, Clarke M. Preferred reporting items for systematic review and meta-analysis  
16 protocols (PRISMA-P) 2015: elaboration and explanation. *BMJ*. 2015;350:7647. doi: 10.1136. PubMed  
17 Central PMCID: PMC25555855.  
18  
19 30. Lizarondo L SC, Carrier J, Godfrey C, Rieger K, Salmond S, Apostolo J, Kirkpatrick P, Loveday H. Chapter  
20 8: Mixed methods systematic reviews: in *JBIM Manual for Evidence Synthesis*. JBI: Aromataris E, Munn Z  
21 (Editors); 2020. Available from:  
22 <https://synthesismanual.jbi.global>.<https://doi.org/10.46658/JBIMES-20-09>.  
23  
24 31. Innovation VH. Covidence systematic review software. Melbourne: Veritas Health Innovation. 2017.  
25  
26 32. RH B. On the use of a pilot sample for sample size determination. *Stat Med*. 1995;14:1933-1940.  
27  
28 33. Bishop FL, Holmes MM. Mixed Methods in CAM Research: A Systematic Review of Studies Published  
29 in 2012. *Evid Based Complement Alternat Med*. 2013;2013:187365. doi: 10.1155/2013/187365.  
30 PubMed PMID: 24454489; PubMed Central PMCID: PMCPMC3881584.  
31  
32 34. Issac H, Moloney C, Taylor M, et al. Mapping of modifiable barriers and facilitators with  
33 interdisciplinary chronic obstructive pulmonary disease (COPD) guidelines concordance within  
34 hospitals to the Theoretical Domains Framework: a mixed methods systematic review protocol. *BMJ*  
35 *Open*. 2020 Jul 20;10(7):e036060. doi: 10.1136/bmjopen-2019-036060. PubMed PMID: 32690740;  
36 PubMed Central PMCID: PMCPMC7375635.  
37  
38 35. Gonzalez-Gonzalez AI SC, Nothacker J. End-of-life care preferences of older patients with  
39 multimorbidity: protocol of a mixed-methods systematic review. *BMJ Open*. 2020;10(7):038682. doi:  
40 10.1136. PubMed Central PMCID: PMC32636289.  
41  
42 36. World Bank list of economies. World Bank website. [databank.worldbank.](http://data.worldbank.org/data/download/site-content/CLASS.xls)  
43 [org/data/download/site-content/CLASS.xls](http://data.worldbank.org/data/download/site-content/CLASS.xls).  
44  
45 37. Schreiber PW, Sax H, Wolfensberger A, Clack L, Kuster SP; Swissnoso. The preventable proportion of  
46 healthcare-associated infections 2005-2016: Systematic review and meta-analysis. *Infect Control Hosp*  
47 *Epidemiol*. 2018 Nov;39(11):1277-1295. doi: 10.1017/ice.2018.183. Epub 2018 Sep 20. PMID:  
48 30234463.  
49  
50  
51  
52  
53  
54  
55  
56  
57  
58  
59  
60

- 1  
2  
3  
4  
5  
6  
7  
8  
9  
10  
11  
12  
13  
14  
15  
16  
17  
18  
19  
20  
21  
22  
23  
24  
25  
26  
27  
28  
29  
30  
31  
32  
33  
34  
35  
36  
37  
38  
39  
40  
41  
42  
43  
44  
45  
46  
47  
48  
49  
50  
51  
52  
53  
54  
55  
56  
57  
58  
59  
60
38. Pluye P, Hong QN. Combining the power of stories and the power of numbers: mixed methods research and mixed studies reviews. *Annu Rev Public Health*. 2014;35:29-45. doi: 10.1146/annurev-publhealth-032013-182440. PubMed PMID: 24188053.
39. Pluye P, Hong QN. Combining the power of stories and the power of numbers: Mixed Methods Research and Mixed Studies Reviews Annual Review of Public Health: Complimentary online access; 2014. Available from: <http://arjournals.annualreviews.org/eprint/qFxpDWrNzjzjwjkgt4V/full/10.1146/annurev-publhealth-032013-182440>.
40. GRADE-CERQual Project Group. What is the CERQual approach? GRADE-CERQual Project Group; 2020. Available from: <https://www.cerqual.org/what-is-the-grade-cerqual-approach2/>.
41. Hutton B C-LF, Moher D. The PRISMA statement extension for systematic reviews incorporating network meta-analysis: PRISMA-NMA. *Med Clin (Barc)*. 2016;147(6):262-266.

1  
2  
3  
4  
5  
6  
7  
8  
9  
10  
11  
12  
13  
14  
15  
16  
17  
18  
19  
20  
21  
22  
23  
24  
25  
26  
27  
28  
29  
30  
31  
32  
33  
34  
35  
36  
37  
38  
39  
40  
41  
42  
43  
44  
45  
46  
47  
48  
49  
50  
51  
52  
53  
54  
55  
56  
57  
58  
59  
60

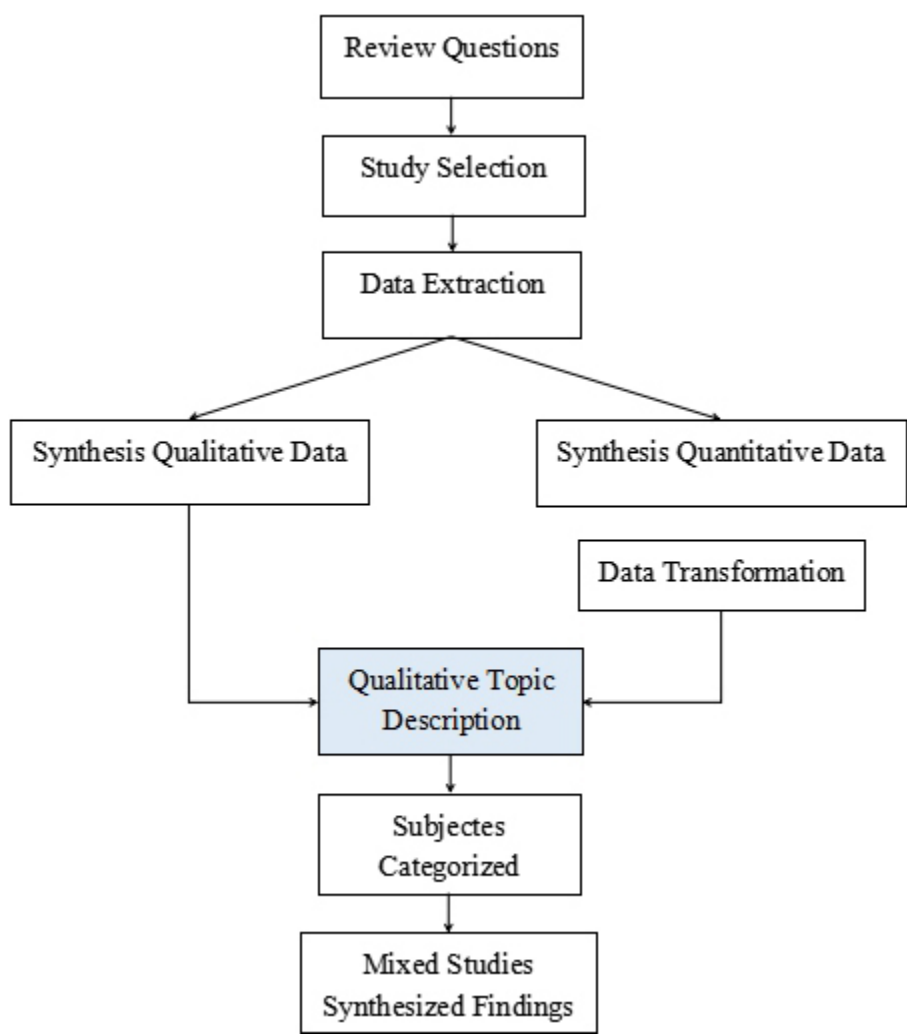

Figure 1. The design process of Systematic review.

38x43mm (300 x 300 DPI)

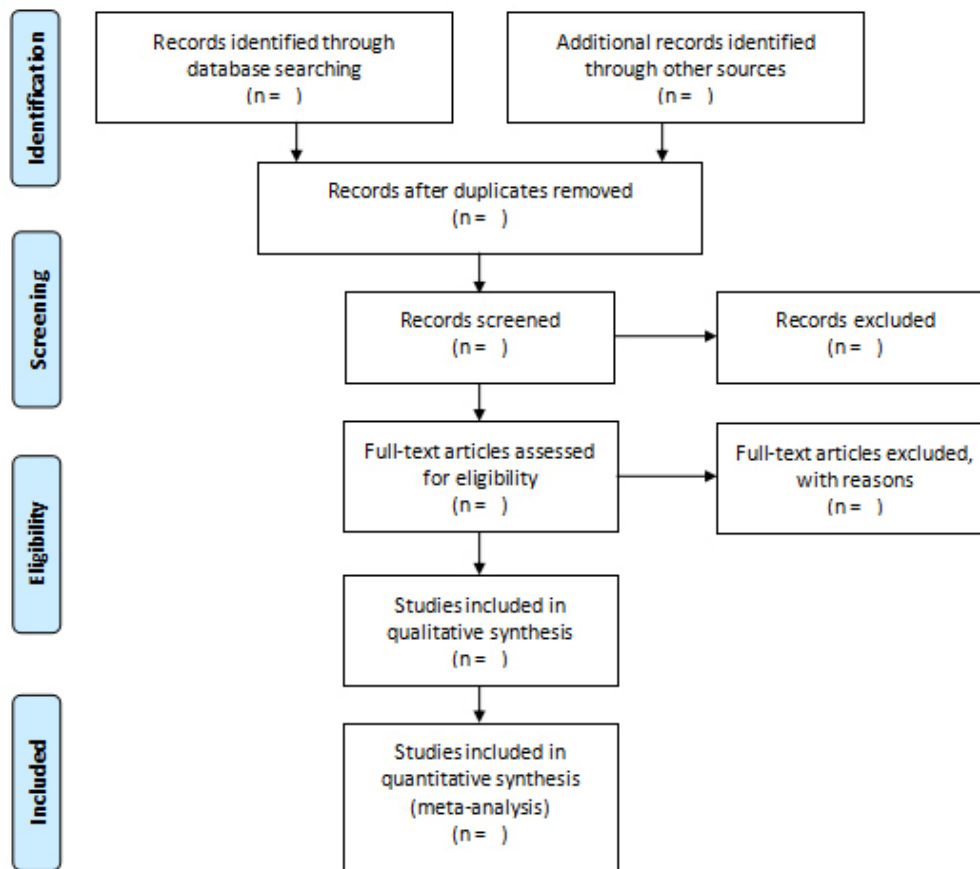

Figure 2. Flow chart diagram will be showed the selection of articles for systemic review.

44x39mm (300 x 300 DPI)

## Supplementary additional file 1

### The detailed search strategy in PubMed

#1 (((((((((((((((("health personnel"[MeSH Terms] OR ("health"[All Fields] AND "personnel"[All Fields])) OR "health personnel"[All Fields]) OR ("healthcare"[All Fields] AND "provider"[All Fields])) OR "healthcare provider"[All Fields]) OR (((("health personnel"[MeSH Terms] OR ("health"[All Fields] AND "personnel"[All Fields])) OR "health personnel"[All Fields]) OR ("healthcare"[All Fields] AND "worker"[All Fields])) OR "healthcare worker"[All Fields])) OR (((("health personnel"[MeSH Terms] OR ("health"[All Fields] AND "personnel"[All Fields])) OR "health personnel"[All Fields]) OR ("health"[All Fields] AND "care"[All Fields]) AND "provider"[All Fields])) OR "health care provider"[All Fields])) OR ((("health personnel"[MeSH Terms] OR ("health"[All Fields] AND "personnel"[All Fields])) OR "health personnel"[All Fields]) OR (((("health personnel"[MeSH Terms] OR ("health"[All Fields] AND "personnel"[All Fields])) OR "health personnel"[All Fields]) OR ("health"[All Fields] AND "professional"[All Fields])) OR "health professional"[All Fields])) OR ((("medical staff"[MeSH Terms] OR ("medical"[All Fields] AND "staff"[All Fields])) OR "medical staff"[All Fields])) OR (((((((((((((((("medic"[All Fields] OR "medical"[All Fields]) OR "medicalization"[MeSH Terms]) OR "medicalization"[All Fields]) OR "medicalizations"[All Fields]) OR "medicalize"[All Fields]) OR "medicalized"[All Fields]) OR "medicalizes"[All Fields]) OR "medicalizing"[All Fields]) OR "medically"[All Fields]) OR "medicals"[All Fields]) OR "medicated"[All Fields]) OR "medication s"[All Fields]) OR "medics"[All Fields]) OR "pharmaceutical preparations"[MeSH Terms]) OR ("pharmaceutical"[All Fields] AND "preparations"[All Fields])) OR "pharmaceutical preparations"[All Fields]) OR "medication"[All Fields]) OR "medications"[All Fields]) AND (((("occupational groups"[MeSH Terms] OR ("occupational"[All Fields] AND "groups"[All Fields])) OR "occupational groups"[All Fields]) OR "worker"[All Fields]) OR "workers"[All Fields]) OR "worker s"[All Fields])))) OR (((("physician s"[All Fields] OR "physicians"[MeSH Terms]) OR "physicians"[All Fields]) OR "physician"[All Fields]) OR "physicians s"[All Fields])) OR ((("clinician"[All Fields] OR "clinician s"[All Fields]) OR "clinicians"[All Fields])) OR (((((((("doctor s"[All Fields] OR "doctoral"[All Fields]) OR "doctorally"[All Fields]) OR "doctorate"[All Fields]) OR "doctorates"[All Fields]) OR "doctoring"[All Fields]) OR "physicians"[MeSH Terms]) OR "physicians"[All Fields]) OR "doctor"[All Fields]) OR "doctors"[All Fields])) OR (((((((("nurse s"[All Fields] OR "nurses"[MeSH Terms]) OR "nurses"[All Fields]) OR "nurse"[All Fields]) OR "nurses s"[All Fields]) OR "nursing"[MeSH Terms]) OR

1  
 2  
 3 "nursing"[All Fields]) OR "nursings"[All Fields]) OR "nursing"[MeSH Subheading])  
 4 OR "breast feeding"[MeSH Terms]) OR ("breast"[All Fields] AND "feeding"[All  
 5 Fields])) OR "breast feeding"[All Fields]) OR "nursing s"[All Fields])) OR (("nursing  
 6 staff"[MeSH Terms] OR ("nursing"[All Fields] AND "staff"[All Fields])) OR  
 7 "nursing staff"[All Fields])) OR (((("delivery of health care"[MeSH Terms] OR  
 8 ("delivery"[All Fields] AND "health"[All Fields]) AND "care"[All Fields])) OR  
 9 "delivery of health care"[All Fields]) OR "healthcare"[All Fields]) OR "healthcare  
 10 s"[All Fields]) OR "healthcares"[All Fields]) AND (((("employee s"[All Fields] OR  
 11 "occupational groups"[MeSH Terms]) OR ("occupational"[All Fields] AND  
 12 "groups"[All Fields])) OR "occupational groups"[All Fields]) OR "employee"[All  
 13 Fields]) OR "employees"[All Fields])) OR (((((((("allied health personnel"[MeSH  
 14 Terms] OR ("allied"[All Fields] AND "health"[All Fields]) AND "personnel"[All  
 15 Fields])) OR "allied health personnel"[All Fields]) OR "paramedics"[All Fields]) OR  
 16 "emergency medical technicians"[MeSH Terms]) OR ("emergency"[All Fields] AND  
 17 "medical"[All Fields]) AND "technicians"[All Fields])) OR "emergency medical  
 18 technicians"[All Fields]) OR "paramedic"[All Fields]) OR "paramedic s"[All Fields])  
 19 OR "paramedical"[All Fields]) OR "paramedicals"[All Fields])

20  
21  
22  
23  
24  
25  
26  
27  
28  
29 **#1 Searching results = 1,811,427**

30  
 31 **#2** "experience"[All Fields] OR "experience s"[All Fields] OR "experiences"[All  
 32 Fields] OR ("percept"[All Fields] OR "perceptibility"[All Fields] OR  
 33 "perceptible"[All Fields] OR "perception"[MeSH Terms] OR "perception"[All Fields]  
 34 OR "perceptions"[All Fields] OR "perceptual"[All Fields] OR "perceptive"[All  
 35 Fields] OR "perceptiveness"[All Fields] OR "percepts"[All Fields]) OR  
 36 ("attitude"[MeSH Terms] OR "attitude"[All Fields] OR "attitudes"[All Fields] OR  
 37 "attitude s"[All Fields]) OR ("attitude"[MeSH Terms] OR "attitude"[All Fields] OR  
 38 "opinion"[All Fields] OR "opinions"[All Fields] OR "opinion s"[All Fields] OR  
 39 "opinionated"[All Fields]) OR ("impact"[All Fields] OR "impactful"[All Fields] OR  
 40 "impacting"[All Fields] OR "impacts"[All Fields] OR "tooth, impacted"[MeSH Terms]  
 41 OR ("tooth"[All Fields] AND "impacted"[All Fields]) OR "impacted tooth"[All Fields]  
 42 OR "impacted"[All Fields]) OR ("affect"[MeSH Terms] OR "affect"[All Fields] OR  
 43 "affects"[All Fields] OR "affected"[All Fields] OR "affecteds"[All Fields] OR  
 44 "affecting"[All Fields]) OR ("emoting"[All Fields] OR "emotion s"[All Fields] OR  
 45 "emotions"[MeSH Terms] OR "emotions"[All Fields] OR "emotion"[All Fields] OR  
 46 "emotional"[All Fields] OR "emotive"[All Fields]) OR ("affect"[MeSH Terms] OR  
 47 "affect"[All Fields] OR "mood"[All Fields]) OR ("mental"[All Fields] OR  
 48 "mentalities"[All Fields] OR "mentality"[All Fields] OR "mentalization"[MeSH  
 49 Terms] OR "mentalization"[All Fields] OR "mentalizing"[All Fields] OR  
 50 "mentalize"[All Fields] OR "mentalized"[All Fields] OR "mentally"[All Fields]) OR  
 51  
 52  
 53  
 54  
 55  
 56  
 57  
 58  
 59  
 60

1  
2  
3 ("burnout, psychological"[MeSH Terms] OR ("burnout"[All Fields] AND  
4 "psychological"[All Fields]) OR "psychological burnout"[All Fields] OR ("burn"[All  
5 Fields] AND "out"[All Fields]) OR "burn out"[All Fields]) OR ("burnout s"[All Fields]  
6 OR "burnout, psychological"[MeSH Terms] OR ("burnout"[All Fields] AND  
7 "psychological"[All Fields]) OR "psychological burnout"[All Fields] OR  
8 "burnout"[All Fields] OR "burnouts"[All Fields]) OR ("burnout,  
9 psychological"[MeSH Terms] OR ("burnout"[All Fields] AND "psychological"[All  
10 Fields]) OR "psychological burnout"[All Fields] OR ("burn"[All Fields] AND  
11 "out"[All Fields]) OR "burn out"[All Fields]) OR ("stress disorders, post  
12 traumatic"[MeSH Terms] OR ("stress"[All Fields] AND "disorders"[All Fields] AND  
13 "post traumatic"[All Fields]) OR "post-traumatic stress disorders"[All Fields] OR  
14 ("stress"[All Fields] AND "disorders"[All Fields] AND "post"[All Fields] AND  
15 "traumatic"[All Fields]) OR "stress disorders post traumatic"[All Fields]) OR ("stress  
16 disorders, post traumatic"[MeSH Terms] OR ("stress"[All Fields] AND  
17 "disorders"[All Fields] AND "post traumatic"[All Fields]) OR "post-traumatic stress  
18 disorders"[All Fields] OR ("post"[All Fields] AND "traumatic"[All Fields] AND  
19 "stress"[All Fields] AND "disorder"[All Fields]) OR "post traumatic stress  
20 disorder"[All Fields]) OR ("stress disorders, post traumatic"[MeSH Terms] OR  
21 ("stress"[All Fields] AND "disorders"[All Fields] AND "post traumatic"[All Fields])  
22 OR "post-traumatic stress disorders"[All Fields] OR ("post"[All Fields] AND  
23 "traumatic"[All Fields] AND "stress"[All Fields] AND "disorder"[All Fields]) OR  
24 "post traumatic stress disorder"[All Fields]) OR ("stress disorders, post  
25 traumatic"[MeSH Terms] OR ("stress"[All Fields] AND "disorders"[All Fields] AND  
26 "post traumatic"[All Fields]) OR "post-traumatic stress disorders"[All Fields] OR  
27 ("posttraumatic"[All Fields] AND "stress"[All Fields] AND "disorder"[All Fields])  
28 OR "posttraumatic stress disorder"[All Fields]) OR ("stress disorders, post  
29 traumatic"[MeSH Terms] OR ("stress"[All Fields] AND "disorders"[All Fields] AND  
30 "post traumatic"[All Fields]) OR "post-traumatic stress disorders"[All Fields] OR  
31 "ptsd"[All Fields]) OR ("stress, psychological"[MeSH Terms] OR ("stress"[All Fields]  
32 AND "psychological"[All Fields]) OR "psychological stress"[All Fields] OR  
33 ("stress"[All Fields] AND "psychological"[All Fields]) OR "stress psychological"[All  
34 Fields]) OR ("psychological distress"[MeSH Terms] OR ("psychological"[All Fields]  
35 AND "distress"[All Fields]) OR "psychological distress"[All Fields]) OR ("affective  
36 symptoms"[MeSH Terms] OR ("affective"[All Fields] AND "symptoms"[All Fields])  
37 OR "affective symptoms"[All Fields]) OR ("stress, psychological"[MeSH Terms] OR  
38 ("stress"[All Fields] AND "psychological"[All Fields]) OR "psychological stress"[All  
39 Fields] OR "suffer"[All Fields] OR "suffered"[All Fields] OR "suffering"[All Fields]  
40 OR "sufferings"[All Fields] OR "suffers"[All Fields] OR "suffereing"[All Fields] OR  
41 "sufferer"[All Fields] OR "sufferer s"[All Fields] OR "sufferers"[All Fields] OR



1  
 2  
 3 "suffered"[All Fields]) OR ("anxiety"[MeSH Terms] OR "anxiety"[All Fields] OR  
 4 "anxieties"[All Fields] OR "anxiety s"[All Fields]) OR ("anxiety"[MeSH Terms] OR  
 5 "anxiety"[All Fields] OR "nervousness"[All Fields]) OR ("depressed"[All Fields] OR  
 6 "depression"[MeSH Terms] OR "depression"[All Fields] OR "depressions"[All Fields]  
 7 OR "depression s"[All Fields] OR "depressive disorder"[MeSH Terms] OR  
 8 ("depressive"[All Fields] AND "disorder"[All Fields]) OR "depressive disorder"[All  
 9 Fields] OR "depressivity"[All Fields] OR "depressive"[All Fields] OR  
 10 "depressively"[All Fields] OR "depressiveness"[All Fields] OR "depressives"[All  
 11 Fields]) OR ("sleep initiation and maintenance disorders"[MeSH Terms] OR  
 12 ("sleep"[All Fields] AND "initiation"[All Fields] AND "maintenance"[All Fields]  
 13 AND "disorders"[All Fields]) OR "sleep initiation and maintenance disorders"[All  
 14 Fields] OR "insomnia"[All Fields] OR "insomnias"[All Fields]) OR ("sleep wake  
 15 disorders"[MeSH Terms] OR ("sleep"[All Fields] AND "wake"[All Fields] AND  
 16 "disorders"[All Fields]) OR "sleep wake disorders"[All Fields] OR ("sleep"[All Fields]  
 17 AND "disorder"[All Fields]) OR "sleep disorder"[All Fields]) OR (("stress"[All  
 18 Fields] OR "stressed"[All Fields] OR "stresses"[All Fields] OR "stressful"[All Fields]  
 19 OR "stressfulness"[All Fields] OR "stressing"[All Fields]) AND ("level"[All Fields]  
 20 OR "levels"[All Fields])) OR ("infect"[All Fields] OR "infectability"[All Fields] OR  
 21 "infectable"[All Fields] OR "infectant"[All Fields] OR "infectants"[All Fields] OR  
 22 "infected"[All Fields] OR "infecteds"[All Fields] OR "infectibility"[All Fields] OR  
 23 "infectible"[All Fields] OR "infecting"[All Fields] OR "infection s"[All Fields] OR  
 24 "infections"[MeSH Terms] OR "infections"[All Fields] OR "infection"[All Fields] OR  
 25 "infective"[All Fields] OR "infectiveness"[All Fields] OR "infectives"[All Fields] OR  
 26 "infectivities"[All Fields] OR "infects"[All Fields] OR "pathogenicity"[MeSH  
 27 Subheading] OR "pathogenicity"[All Fields] OR "infectivity"[All Fields]) OR  
 28 ("epidemiology"[MeSH Subheading] OR "epidemiology"[All Fields] OR  
 29 "incidence"[All Fields] OR "incidence"[MeSH Terms] OR "incidences"[All Fields]  
 30 OR "incident"[All Fields] OR "incidents"[All Fields]) OR ("epidemiology"[MeSH  
 31 Subheading] OR "epidemiology"[All Fields] OR "morbidity"[All Fields] OR  
 32 "morbidity"[MeSH Terms] OR "morbid"[All Fields] OR "morbiditys"[All Fields] OR  
 33 "morbids"[All Fields])

34  
35  
36  
37  
38  
39  
40  
41  
42  
43  
44  
45  
46  
47  
48  
49  
50 **#2 Searching results =10,519,278**

51  
 52 **#3** (((((((((((((((((((("coronavirus"[MeSH Terms] OR "coronavirus"[All Fields]) OR  
 53 "coronaviruses"[All Fields]) OR (((((((("covid 19"[All Fields] OR "covid 2019"[All  
 54 Fields]) OR "severe acute respiratory syndrome coronavirus 2"[Supplementary  
 55 Concept]) OR "severe acute respiratory syndrome coronavirus 2"[All Fields]) OR  
 56 "2019 ncov"[All Fields]) OR "sars cov 2"[All Fields]) OR "2019ncov"[All Fields])  
 57 OR (("wuhan"[All Fields] AND ("coronavirus"[MeSH Terms] OR "coronavirus"[All

1  
2  
3 Fields))) AND (2019/12/1:2019/12/31[Date - Publication] OR  
4 2020/1/1:2020/12/31[Date - Publication])))) OR "SARSCOV2"[All Fields] OR  
5 (("severe acute respiratory syndrome coronavirus 2"[Supplementary Concept] OR  
6 "severe acute respiratory syndrome coronavirus 2"[All Fields] OR "2019 ncov"[All  
7 Fields])) OR (((("covid 19"[Supplementary Concept] OR "covid 19"[All Fields] OR  
8 "covid19"[All Fields] AND "Ncov"[All Fields])) OR ("2019"[All Fields] AND  
9 ("coronavirus"[MeSH Terms] OR "coronavirus"[All Fields] OR "coronaviruses"[All  
10 Fields]))) OR (((("novel"[All Fields] OR "novel s"[All Fields] OR "novels"[All  
11 Fields] AND ("coronavirus"[MeSH Terms] OR "coronavirus"[All Fields] OR  
12 "coronaviruses"[All Fields]))) OR ("new"[All Fields] AND ("coronavirus"[MeSH  
13 Terms] OR "coronavirus"[All Fields] OR "coronaviruses"[All Fields]))) OR  
14 ("nouveau"[All Fields] AND ("coronavirus"[MeSH Terms] OR "coronavirus"[All  
15 Fields] OR "coronaviruses"[All Fields]))) OR ((("covid 19"[Supplementary Concept]  
16 OR "covid 19"[All Fields] OR "covid19"[All Fields])) OR (((("acute"[All Fields] OR  
17 "acutely"[All Fields] OR "acutes"[All Fields] AND "respiratory"[All Fields] AND  
18 (((((((("syndrom"[All Fields] OR "syndromal"[All Fields] OR "syndromally"[All  
19 Fields] OR "syndrome"[MeSH Terms] OR "syndrome"[All Fields] OR  
20 "syndromes"[All Fields] OR "syndrome s"[All Fields] OR "syndromic"[All Fields]  
21 OR "syndroms"[All Fields] AND ("coronavirus"[MeSH Terms] OR  
22 "coronavirus"[All Fields] OR "coronaviruses"[All Fields] AND "2"[All Fields]))  
23 OR "SARS-2"[All Fields] OR ((("severe acute respiratory syndrome coronavirus  
24 2"[Supplementary Concept] OR "severe acute respiratory syndrome coronavirus  
25 2"[All Fields] OR "wuhan seafood market pneumonia virus"[All Fields])) OR  
26 "SARS"[All Fields] OR (((("sars virus"[MeSH Terms] OR ("SARS"[All Fields]  
27 AND "virus"[All Fields])) OR "sars virus"[All Fields] OR ("SARS"[All Fields] AND  
28 "cov"[All Fields])) OR "sars cov"[All Fields])) OR ((("sars virus"[MeSH Terms] OR  
29 ("SARS"[All Fields] AND "virus"[All Fields])) OR "sars virus"[All Fields])) OR  
30 ((("severe acute respiratory syndrome"[MeSH Terms] OR (((("severe"[All Fields] AND  
31 "acute"[All Fields] AND "respiratory"[All Fields] AND "syndrome"[All Fields])  
32 OR "severe acute respiratory syndrome"[All Fields])) OR (((("coronavirus  
33 infections"[MeSH Terms] OR ("coronavirus"[All Fields] AND "infections"[All  
34 Fields])) OR "coronavirus infections"[All Fields] OR "mers"[All Fields])) OR  
35 (((("middle east respiratory syndrome coronavirus"[MeSH Terms] OR  
36 (((("middle"[All Fields] AND "east"[All Fields] AND "respiratory"[All Fields]  
37 AND "syndrome"[All Fields] AND "coronavirus"[All Fields])) OR "middle east  
38 respiratory syndrome coronavirus"[All Fields] OR ("mers"[All Fields] AND  
39 "virus"[All Fields])) OR "mers virus"[All Fields])) OR (((("coronavirus  
40 infections"[MeSH Terms] OR ("coronavirus"[All Fields] AND "infections"[All  
41 Fields])) OR "coronavirus infections"[All Fields] OR (((("middle"[All Fields] AND

"east"[All Fields]) AND "respiratory"[All Fields]) AND "syndrome"[All Fields])) OR  
 "middle east respiratory syndrome"[All Fields])) OR (((("middle east respiratory  
 syndrome coronavirus"[MeSH Terms] OR (((("middle"[All Fields] AND "east"[All  
 Fields]) AND "respiratory"[All Fields]) AND "syndrome"[All Fields]) AND  
 "coronavirus"[All Fields])) OR "middle east respiratory syndrome coronavirus"[All  
 Fields]) OR (((("middle"[All Fields] AND "east"[All Fields]) AND "respiratory"[All  
 Fields]) AND "syndrome"[All Fields]) AND "related"[All Fields]) AND  
 "coronavirus"[All Fields])) OR "middle east respiratory syndrome related  
 coronavirus"[All Fields])) OR (((("middle east respiratory syndrome  
 coronavirus"[MeSH Terms] OR (((("middle"[All Fields] AND "east"[All Fields])  
 AND "respiratory"[All Fields]) AND "syndrome"[All Fields]) AND  
 "coronavirus"[All Fields])) OR "middle east respiratory syndrome coronavirus"[All  
 Fields]) OR ("mers"[All Fields] AND "cov"[All Fields])) OR "mers cov"[All Fields])

### #3 Searching results = 73,347

**#4** (((((((((((((((((((((((((((("cohort studies"[MeSH Terms] OR ("cohort"[All Fields]  
 AND "studies"[All Fields])) OR "cohort studies"[All Fields]) OR ("cohort"[All Fields]  
 AND "study"[All Fields])) OR "cohort study"[All Fields]) OR (((("cohort  
 studies"[MeSH Terms] OR ("cohort"[All Fields] AND "studies"[All Fields])) OR  
 "cohort studies"[All Fields]) OR ("incidence"[All Fields] AND "study"[All Fields]))  
 OR "incidence study"[All Fields])) OR (((("cohort studies"[MeSH Terms] OR  
 ("cohort"[All Fields] AND "studies"[All Fields])) OR "cohort studies"[All Fields])  
 OR ("cohort"[All Fields] AND "analysis"[All Fields])) OR "cohort analysis"[All  
 Fields])) OR (((("cohort studies"[MeSH Terms] OR ("cohort"[All Fields] AND  
 "studies"[All Fields])) OR "cohort studies"[All Fields]) OR ("cohort"[All Fields]  
 AND "analyses"[All Fields])) OR "cohort analyses"[All Fields])) OR (((("cohort  
 studies"[MeSH Terms] OR ("cohort"[All Fields] AND "studies"[All Fields])) OR  
 "cohort studies"[All Fields]) OR ("concurrent"[All Fields] AND "study"[All Fields]))  
 OR "concurrent study"[All Fields])) OR (((("cohort studies"[MeSH Terms] OR  
 ("cohort"[All Fields] AND "studies"[All Fields])) OR "cohort studies"[All Fields])  
 OR (("closed"[All Fields] AND "cohort"[All Fields]) AND "study"[All Fields])) OR  
 "closed cohort study"[All Fields])) OR (((("cohort studies"[MeSH Terms] OR  
 ("cohort"[All Fields] AND "studies"[All Fields])) OR "cohort studies"[All Fields])  
 OR (("historical"[All Fields] AND "cohort"[All Fields]) AND "study"[All Fields]))  
 OR "historical cohort study"[All Fields])) OR (((("cross-sectional studies"[MeSH  
 Terms] OR ("cross sectional"[All Fields] AND "studies"[All Fields])) OR "cross  
 sectional studies"[All Fields]) OR ("prevalence"[All Fields] AND "study"[All Fields]))  
 OR "prevalence study"[All Fields])) OR (((("cross-sectional studies"[MeSH Terms]  
 OR ("cross sectional"[All Fields] AND "studies"[All Fields])) OR "cross sectional

1  
2  
3 studies"[All Fields]) OR (("disease"[All Fields] AND "frequency"[All Fields]) AND  
4 "survey"[All Fields])) OR (((("cross-sectional studies"[MeSH Terms] OR ("cross  
5 sectional"[All Fields] AND "studies"[All Fields])) OR "cross sectional studies"[All  
6 Fields]) OR ("cross"[All Fields] AND "sectional"[All Fields])) OR "cross  
7 sectional"[All Fields])) OR (((("cross-sectional studies"[MeSH Terms] OR ("cross  
8 sectional"[All Fields] AND "studies"[All Fields])) OR "cross sectional studies"[All  
9 Fields]) OR ("cross"[All Fields] AND "sectional"[All Fields])) OR "cross  
10 sectional"[All Fields])) OR ((("empirical research"[MeSH Terms] OR ("empirical"[All  
11 Fields] AND "research"[All Fields])) OR "empirical research"[All Fields])) OR  
12 (((("qualitative research"[MeSH Terms] OR ("qualitative"[All Fields] AND  
13 "research"[All Fields])) OR "qualitative research"[All Fields]) OR ("qualitative"[All  
14 Fields] AND "study"[All Fields])) OR "qualitative study"[All Fields])) OR  
15 ((("qualitative research"[MeSH Terms] OR ("qualitative"[All Fields] AND  
16 "research"[All Fields])) OR "qualitative research"[All Fields])) OR  
17 (((("qualitative"[All Fields] OR "qualitatively"[All Fields]) OR "qualitatives"[All  
18 Fields]) AND (((("description"[All Fields] OR "descriptions"[All Fields]) OR  
19 "descriptive"[All Fields]) OR "descriptively"[All Fields]) OR "descriptives"[All  
20 Fields]))) OR (((("phenomenologic"[All Fields] OR "phenomenological"[All Fields])  
21 OR "phenomenologically"[All Fields]) AND (((("studies"[All Fields] OR "study"[All  
22 Fields]) OR "study s"[All Fields]) OR "studying"[All Fields]) OR "studys"[All  
23 Fields]))) OR ((("grounded theory"[MeSH Terms] OR ("grounded"[All Fields] AND  
24 "theory"[All Fields])) OR "grounded theory"[All Fields])) OR (((("anthropology,  
25 cultural"[MeSH Terms] OR ("anthropology"[All Fields] AND "cultural"[All Fields]))  
26 OR "cultural anthropology"[All Fields]) OR "ethnographies"[All Fields]) OR  
27 "ethnography"[All Fields])) OR (((("anthropologies"[All Fields] OR  
28 "anthropology"[MeSH Terms]) OR "anthropology"[All Fields]) OR "anthropology  
29 s"[All Fields])) OR (((("behavioural research"[All Fields] OR "behavioral  
30 research"[MeSH Terms]) OR ("behavioral"[All Fields] AND "research"[All Fields]))  
31 OR "behavioral research"[All Fields])) OR (((("health services research"[MeSH  
32 Terms] OR ("health"[All Fields] AND "services"[All Fields]) AND "research"[All  
33 Fields])) OR "health services research"[All Fields]) OR ("action"[All Fields] AND  
34 "research"[All Fields])) OR "action research"[All Fields])) OR (((("mixed"[All Fields]  
35 OR "mixes"[All Fields]) OR "mixing"[All Fields]) OR "mixings"[All Fields]) AND  
36 (((("method s"[All Fields] OR "methods"[MeSH Terms]) OR "methods"[All Fields])  
37 OR "method"[All Fields]) OR "methods"[MeSH Subheading])) OR  
38 "mixed-method"[All Fields]) OR (((((((((((("investigated"[All Fields] OR  
39 "investigates"[All Fields]) OR "investigating"[All Fields]) OR "investigation"[All  
40 Fields]) OR "investigations"[All Fields]) OR "investigative"[All Fields]) OR  
41 "investigator s"[All Fields]) OR "research personnel"[MeSH Terms]) OR

1  
2  
3 ("research"[All Fields] AND "personnel"[All Fields])) OR "research personnel"[All  
4 Fields]) OR "investigator"[All Fields]) OR "investigators"[All Fields]) AND  
5 (((((((((((("research personnel"[MeSH Terms] OR ("research"[All Fields] AND  
6 "personnel"[All Fields])) OR "research personnel"[All Fields]) OR "researcher"[All  
7 Fields]) OR "researchers"[All Fields]) OR "research"[MeSH Terms]) OR  
8 "research"[All Fields]) OR "research s"[All Fields]) OR "researchable"[All Fields])  
9 OR "researche"[All Fields]) OR "researched"[All Fields]) OR "researcher s"[All  
10 Fields]) OR "researches"[All Fields]) OR "researching"[All Fields]) OR  
11 "researchs"[All Fields])))) OR (((((((((((("investigated"[All Fields] OR  
12 "investigates"[All Fields]) OR "investigating"[All Fields]) OR "investigation"[All  
13 Fields]) OR "investigations"[All Fields]) OR "investigative"[All Fields]) OR  
14 "investigator s"[All Fields]) OR "research personnel"[MeSH Terms]) OR  
15 ("research"[All Fields] AND "personnel"[All Fields])) OR "research personnel"[All  
16 Fields]) OR "investigator"[All Fields]) OR "investigators"[All Fields]) AND  
17 (((("studies"[All Fields] OR "study"[All Fields]) OR "study s"[All Fields]) OR  
18 "studying"[All Fields]) OR "studys"[All Fields]))

19  
20  
21  
22  
23  
24  
25  
26  
27  
28 **#4 Searching results = 6,302,298**

29  
30 **#5 (#1 AND #2 AND #3 AND #4) Searching results =2380 (31 July 2020-PubMed)**  
31  
32  
33  
34  
35  
36  
37  
38  
39  
40  
41  
42  
43  
44  
45  
46  
47  
48  
49  
50  
51  
52  
53  
54  
55  
56  
57  
58  
59  
60

## PRISMA-P 2015 Checklist

This checklist has been adapted for use with protocol submissions to *Systematic Reviews* from Table 3 in Moher D et al: Preferred reporting items for systematic review and meta-analysis protocols (PRISMA-P) 2015 statement. *Systematic Reviews* 2015 4:1

| Section/topic                     | #  | Checklist item                                                                                                                                                                                  | Information reported                |                                     | Line number(s) |
|-----------------------------------|----|-------------------------------------------------------------------------------------------------------------------------------------------------------------------------------------------------|-------------------------------------|-------------------------------------|----------------|
|                                   |    |                                                                                                                                                                                                 | Yes                                 | No                                  |                |
| <b>ADMINISTRATIVE INFORMATION</b> |    |                                                                                                                                                                                                 |                                     |                                     |                |
| <b>Title</b>                      |    |                                                                                                                                                                                                 |                                     |                                     |                |
| Identification                    | 1a | Identify the report as a protocol of a systematic review                                                                                                                                        | <input checked="" type="checkbox"/> | <input type="checkbox"/>            | 1              |
| Update                            | 1b | If the protocol is for an update of a previous systematic review, identify as such                                                                                                              | <input type="checkbox"/>            | <input checked="" type="checkbox"/> | NA             |
| <b>Registration</b>               | 2  | If registered, provide the name of the registry (e.g., PROSPERO) and registration number in the Abstract                                                                                        | <input checked="" type="checkbox"/> | <input type="checkbox"/>            | 3              |
| <b>Authors</b>                    |    |                                                                                                                                                                                                 |                                     |                                     |                |
| Contact                           | 3a | Provide name, institutional affiliation, and e-mail address of all protocol authors; provide physical mailing address of corresponding author                                                   | <input checked="" type="checkbox"/> | <input type="checkbox"/>            | 1              |
| Contributions                     | 3b | Describe contributions of protocol authors and identify the guarantor of the review                                                                                                             | <input checked="" type="checkbox"/> | <input type="checkbox"/>            | 18             |
| <b>Amendments</b>                 | 4  | If the protocol represents an amendment of a previously completed or published protocol, identify as such and list changes; otherwise, state plan for documenting important protocol amendments | <input type="checkbox"/>            | <input checked="" type="checkbox"/> | NA             |
| <b>Support</b>                    |    |                                                                                                                                                                                                 |                                     |                                     |                |
| Sources                           | 5a | Indicate sources of financial or other support for the review                                                                                                                                   | <input checked="" type="checkbox"/> | <input type="checkbox"/>            | 18             |
| Sponsor                           | 5b | Provide name for the review funder and/or sponsor                                                                                                                                               | <input type="checkbox"/>            | <input checked="" type="checkbox"/> | NA             |
| Role of sponsor/funder            | 5c | Describe roles of funder(s), sponsor(s), and/or institution(s), if any, in developing the protocol                                                                                              | <input type="checkbox"/>            | <input checked="" type="checkbox"/> | NA             |
| <b>INTRODUCTION</b>               |    |                                                                                                                                                                                                 |                                     |                                     |                |
| <b>Rationale</b>                  | 6  | Describe the rationale for the review in the context of what is already known                                                                                                                   | <input checked="" type="checkbox"/> | <input type="checkbox"/>            | 5-8            |
| <b>Objectives</b>                 | 7  | Provide an explicit statement of the question(s) the review will address with reference to participants, interventions, comparators, and outcomes (PICO)                                        | <input checked="" type="checkbox"/> | <input type="checkbox"/>            | 8              |
| <b>METHODS</b>                    |    |                                                                                                                                                                                                 |                                     |                                     |                |

| Section/topic                             | #   | Checklist item                                                                                                                                                                                                                              | Information reported                |                          | Line number(s) |
|-------------------------------------------|-----|---------------------------------------------------------------------------------------------------------------------------------------------------------------------------------------------------------------------------------------------|-------------------------------------|--------------------------|----------------|
|                                           |     |                                                                                                                                                                                                                                             | Yes                                 | No                       |                |
| <b>Eligibility criteria</b>               | 8   | Specify the study characteristics (e.g., PICO, study design, setting, time frame) and report characteristics (e.g., years considered, language, publication status) to be used as criteria for eligibility for the review                   | <input checked="" type="checkbox"/> | <input type="checkbox"/> | 8-12           |
| <b>Information sources</b>                | 9   | Describe all intended information sources (e.g., electronic databases, contact with study authors, trial registers, or other grey literature sources) with planned dates of coverage                                                        | <input checked="" type="checkbox"/> | <input type="checkbox"/> | 9              |
| <b>Search strategy</b>                    | 10  | Present draft of search strategy to be used for at least one electronic database, including planned limits, such that it could be repeated                                                                                                  | <input checked="" type="checkbox"/> | <input type="checkbox"/> | 9-10           |
| <b>STUDY RECORDS</b>                      |     |                                                                                                                                                                                                                                             |                                     |                          |                |
| Data management                           | 11a | Describe the mechanism(s) that will be used to manage records and data throughout the review                                                                                                                                                | <input checked="" type="checkbox"/> | <input type="checkbox"/> | 12-13          |
| Selection process                         | 11b | State the process that will be used for selecting studies (e.g., two independent reviewers) through each phase of the review (i.e., screening, eligibility, and inclusion in meta-analysis)                                                 | <input checked="" type="checkbox"/> | <input type="checkbox"/> | 13             |
| Data collection process                   | 11c | Describe planned method of extracting data from reports (e.g., piloting forms, done independently, in duplicate), any processes for obtaining and confirming data from investigators                                                        | <input checked="" type="checkbox"/> | <input type="checkbox"/> | 13-14          |
| <b>Data items</b>                         | 12  | List and define all variables for which data will be sought (e.g., PICO items, funding sources), any pre-planned data assumptions and simplifications                                                                                       | <input checked="" type="checkbox"/> | <input type="checkbox"/> | 11-12          |
| <b>Outcomes and prioritization</b>        | 13  | List and define all outcomes for which data will be sought, including prioritization of main and additional outcomes, with rationale                                                                                                        | <input checked="" type="checkbox"/> | <input type="checkbox"/> | 11--12         |
| <b>Risk of bias in individual studies</b> | 14  | Describe anticipated methods for assessing risk of bias of individual studies, including whether this will be done at the outcome or study level, or both; state how this information will be used in data synthesis                        | <input checked="" type="checkbox"/> | <input type="checkbox"/> | 15-16          |
| <b>DATA</b>                               |     |                                                                                                                                                                                                                                             |                                     |                          |                |
| <b>Synthesis</b>                          | 15a | Describe criteria under which study data will be quantitatively synthesized                                                                                                                                                                 | <input checked="" type="checkbox"/> | <input type="checkbox"/> | 14-15          |
|                                           | 15b | If data are appropriate for quantitative synthesis, describe planned summary measures, methods of handling data, and methods of combining data from studies, including any planned exploration of consistency (e.g., $I^2$ , Kendall's tau) | <input checked="" type="checkbox"/> | <input type="checkbox"/> | 14-15          |
|                                           | 15c | Describe any proposed additional analyses (e.g., sensitivity or subgroup analyses, meta-regression)                                                                                                                                         | <input checked="" type="checkbox"/> | <input type="checkbox"/> | 15-16          |
|                                           | 15d | If quantitative synthesis is not appropriate, describe the type of summary planned                                                                                                                                                          | <input checked="" type="checkbox"/> | <input type="checkbox"/> | 14-15          |
| <b>Meta-bias(es)</b>                      | 16  | Specify any planned assessment of meta-bias(es) (e.g., publication bias across studies, selective reporting within studies)                                                                                                                 | <input checked="" type="checkbox"/> | <input type="checkbox"/> | 16             |
| <b>Confidence in cumulative evidence</b>  | 17  | Describe how the strength of the body of evidence will be assessed (e.g., GRADE)                                                                                                                                                            | <input checked="" type="checkbox"/> | <input type="checkbox"/> | 17             |
