# Supplementary material for: Experiences of healthcare providers during the coronavirus pandemic and its impact on them: protocol for a mixed-methods systematic review
Source: PubMed Central journal article supplement — BMJ Open. 2021 Feb 26;11(2):e043686. doi: 10.1136/bmjopen-2020-043686 (PMC7918807; doi:10.1136/bmjopen-2020-043686), 2021-02-26
Supplement: bmjopen-2020-043686supp001.pdf [file bmjopen-2020-043686supp001.pdf]

## Supplementary additional file 1

### The detailed search strategy in PubMed

#1 (((((((((((((((("health personnel"[MeSH Terms] OR ("health"[All Fields] AND "personnel"[All Fields])) OR "health personnel"[All Fields]) OR ("healthcare"[All Fields] AND "provider"[All Fields])) OR "healthcare provider"[All Fields]) OR (((("health personnel"[MeSH Terms] OR ("health"[All Fields] AND "personnel"[All Fields])) OR "health personnel"[All Fields]) OR ("healthcare"[All Fields] AND "worker"[All Fields])) OR "healthcare worker"[All Fields])) OR (((("health personnel"[MeSH Terms] OR ("health"[All Fields] AND "personnel"[All Fields])) OR "health personnel"[All Fields]) OR ("health"[All Fields] AND "care"[All Fields]) AND "provider"[All Fields])) OR "health care provider"[All Fields])) OR ((("health personnel"[MeSH Terms] OR ("health"[All Fields] AND "personnel"[All Fields])) OR "health personnel"[All Fields]) OR (((("health personnel"[MeSH Terms] OR ("health"[All Fields] AND "personnel"[All Fields])) OR "health personnel"[All Fields]) OR ("health"[All Fields] AND "professional"[All Fields])) OR "health professional"[All Fields])) OR ((("medical staff"[MeSH Terms] OR ("medical"[All Fields] AND "staff"[All Fields])) OR "medical staff"[All Fields]) OR (((((((((((((((("medic"[All Fields] OR "medical"[All Fields]) OR "medicalization"[MeSH Terms]) OR "medicalization"[All Fields]) OR "medicalizations"[All Fields]) OR "medicalize"[All Fields]) OR "medicalized"[All Fields]) OR "medicalizes"[All Fields]) OR "medicalizing"[All Fields]) OR "medically"[All Fields]) OR "medicals"[All Fields]) OR "medicated"[All Fields]) OR "medication s"[All Fields]) OR "medics"[All Fields]) OR "pharmaceutical preparations"[MeSH Terms]) OR ("pharmaceutical"[All Fields] AND "preparations"[All Fields])) OR "pharmaceutical preparations"[All Fields]) OR "medication"[All Fields]) OR "medications"[All Fields]) AND (((("occupational groups"[MeSH Terms] OR ("occupational"[All Fields] AND "groups"[All Fields])) OR "occupational groups"[All Fields]) OR "worker"[All Fields]) OR "workers"[All Fields]) OR "worker s"[All Fields])))) OR (((("physician s"[All Fields] OR "physicians"[MeSH Terms]) OR "physicians"[All Fields]) OR "physician"[All Fields]) OR "physicians s"[All Fields])) OR ((("clinician"[All Fields] OR "clinician s"[All Fields]) OR "clinicians"[All Fields])) OR (((((((("doctor s"[All Fields] OR "doctoral"[All Fields]) OR "doctorally"[All Fields]) OR "doctorate"[All Fields]) OR "doctorates"[All Fields]) OR "doctoring"[All Fields]) OR "physicians"[MeSH Terms]) OR "physicians"[All Fields]) OR "doctor"[All Fields]) OR "doctors"[All Fields])) OR (((((((("nurse s"[All Fields] OR "nurses"[MeSH Terms]) OR "nurses"[All Fields]) OR "nurse"[All Fields]) OR "nurses s"[All Fields]) OR "nursing"[MeSH Terms]) OR

"nursing"[All Fields] OR "nursings"[All Fields] OR "nursing"[MeSH Subheading] OR "breast feeding"[MeSH Terms] OR ("breast"[All Fields] AND "feeding"[All Fields]) OR "breast feeding"[All Fields] OR "nursing s"[All Fields]) OR (("nursing staff"[MeSH Terms] OR ("nursing"[All Fields] AND "staff"[All Fields])) OR "nursing staff"[All Fields]) OR (((("delivery of health care"[MeSH Terms] OR ("delivery"[All Fields] AND "health"[All Fields] AND "care"[All Fields]) OR "delivery of health care"[All Fields] OR "healthcare"[All Fields] OR "healthcare s"[All Fields] OR "healthcares"[All Fields]) AND (((("employee s"[All Fields] OR "occupational groups"[MeSH Terms]) OR ("occupational"[All Fields] AND "groups"[All Fields])) OR "occupational groups"[All Fields] OR "employee"[All Fields] OR "employees"[All Fields]))) OR (((((((("allied health personnel"[MeSH Terms] OR ("allied"[All Fields] AND "health"[All Fields] AND "personnel"[All Fields]) OR "allied health personnel"[All Fields] OR "paramedics"[All Fields] OR "emergency medical technicians"[MeSH Terms] OR ("emergency"[All Fields] AND "medical"[All Fields] AND "technicians"[All Fields])) OR "emergency medical technicians"[All Fields] OR "paramedic"[All Fields] OR "paramedic s"[All Fields] OR "paramedical"[All Fields] OR "paramedicals"[All Fields])

**#1 Searching results = 1,811,427**

**#2** "experience"[All Fields] OR "experience s"[All Fields] OR "experiences"[All Fields] OR ("percept"[All Fields] OR "perceptibility"[All Fields] OR "perceptible"[All Fields] OR "perception"[MeSH Terms] OR "perception"[All Fields] OR "perceptions"[All Fields] OR "perceptual"[All Fields] OR "perceptive"[All Fields] OR "perceptiveness"[All Fields] OR "percepts"[All Fields]) OR ("attitude"[MeSH Terms] OR "attitude"[All Fields] OR "attitudes"[All Fields] OR "attitude s"[All Fields]) OR ("attitude"[MeSH Terms] OR "attitude"[All Fields] OR "opinion"[All Fields] OR "opinions"[All Fields] OR "opinion s"[All Fields] OR "opinionated"[All Fields]) OR ("impact"[All Fields] OR "impactful"[All Fields] OR "impacting"[All Fields] OR "impacts"[All Fields] OR "tooth, impacted"[MeSH Terms] OR ("tooth"[All Fields] AND "impacted"[All Fields]) OR "impacted tooth"[All Fields] OR "impacted"[All Fields]) OR ("affect"[MeSH Terms] OR "affect"[All Fields] OR "affects"[All Fields] OR "affected"[All Fields] OR "affecteds"[All Fields] OR "affecting"[All Fields]) OR ("emoting"[All Fields] OR "emotion s"[All Fields] OR "emotions"[MeSH Terms] OR "emotions"[All Fields] OR "emotion"[All Fields] OR "emotional"[All Fields] OR "emotive"[All Fields]) OR ("affect"[MeSH Terms] OR "affect"[All Fields] OR "mood"[All Fields]) OR ("mental"[All Fields] OR "mentalities"[All Fields] OR "mentality"[All Fields] OR "mentalization"[MeSH Terms] OR "mentalization"[All Fields] OR "mentalizing"[All Fields] OR "mentalize"[All Fields] OR "mentalized"[All Fields] OR "mentally"[All Fields]) OR

("burnout, psychological"[MeSH Terms] OR ("burnout"[All Fields] AND "psychological"[All Fields]) OR "psychological burnout"[All Fields] OR ("burn"[All Fields] AND "out"[All Fields]) OR "burn out"[All Fields]) OR ("burnout s"[All Fields] OR "burnout, psychological"[MeSH Terms] OR ("burnout"[All Fields] AND "psychological"[All Fields]) OR "psychological burnout"[All Fields] OR "burnout"[All Fields] OR "burnouts"[All Fields]) OR ("burnout, psychological"[MeSH Terms] OR ("burnout"[All Fields] AND "psychological"[All Fields]) OR "psychological burnout"[All Fields] OR ("burn"[All Fields] AND "out"[All Fields]) OR "burn out"[All Fields]) OR ("stress disorders, post traumatic"[MeSH Terms] OR ("stress"[All Fields] AND "disorders"[All Fields] AND "post traumatic"[All Fields]) OR "post-traumatic stress disorders"[All Fields] OR ("stress"[All Fields] AND "disorders"[All Fields] AND "post"[All Fields] AND "traumatic"[All Fields]) OR "stress disorders post traumatic"[All Fields]) OR ("stress disorders, post traumatic"[MeSH Terms] OR ("stress"[All Fields] AND "disorders"[All Fields] AND "post traumatic"[All Fields]) OR "post-traumatic stress disorders"[All Fields] OR ("post"[All Fields] AND "traumatic"[All Fields] AND "stress"[All Fields] AND "disorder"[All Fields]) OR "post traumatic stress disorder"[All Fields]) OR ("stress disorders, post traumatic"[MeSH Terms] OR ("stress"[All Fields] AND "disorders"[All Fields] AND "post traumatic"[All Fields]) OR "post-traumatic stress disorders"[All Fields] OR ("post"[All Fields] AND "traumatic"[All Fields] AND "stress"[All Fields] AND "disorder"[All Fields]) OR "post traumatic stress disorder"[All Fields]) OR ("stress disorders, post traumatic"[MeSH Terms] OR ("stress"[All Fields] AND "disorders"[All Fields] AND "post traumatic"[All Fields]) OR "post-traumatic stress disorders"[All Fields] OR ("posttraumatic"[All Fields] AND "stress"[All Fields] AND "disorder"[All Fields]) OR "posttraumatic stress disorder"[All Fields]) OR ("stress disorders, post traumatic"[MeSH Terms] OR ("stress"[All Fields] AND "disorders"[All Fields] AND "post traumatic"[All Fields]) OR "post-traumatic stress disorders"[All Fields] OR "ptsd"[All Fields]) OR ("stress, psychological"[MeSH Terms] OR ("stress"[All Fields] AND "psychological"[All Fields]) OR "psychological stress"[All Fields] OR ("stress"[All Fields] AND "psychological"[All Fields]) OR "stress psychological"[All Fields]) OR ("psychological distress"[MeSH Terms] OR ("psychological"[All Fields] AND "distress"[All Fields]) OR "psychological distress"[All Fields]) OR ("affective symptoms"[MeSH Terms] OR ("affective"[All Fields] AND "symptoms"[All Fields]) OR "affective symptoms"[All Fields]) OR ("stress, psychological"[MeSH Terms] OR ("stress"[All Fields] AND "psychological"[All Fields]) OR "psychological stress"[All Fields] OR "suffer"[All Fields] OR "suffered"[All Fields] OR "suffering"[All Fields] OR "sufferings"[All Fields] OR "suffers"[All Fields] OR "suffereing"[All Fields] OR "sufferer"[All Fields] OR "sufferer s"[All Fields] OR "sufferers"[All Fields] OR

"suffered"[All Fields]) OR ("anxiety"[MeSH Terms] OR "anxiety"[All Fields] OR "anxieties"[All Fields] OR "anxiety s"[All Fields]) OR ("anxiety"[MeSH Terms] OR "anxiety"[All Fields] OR "nervousness"[All Fields]) OR ("depressed"[All Fields] OR "depression"[MeSH Terms] OR "depression"[All Fields] OR "depressions"[All Fields] OR "depression s"[All Fields] OR "depressive disorder"[MeSH Terms] OR ("depressive"[All Fields] AND "disorder"[All Fields]) OR "depressive disorder"[All Fields] OR "depressivity"[All Fields] OR "depressive"[All Fields] OR "depressively"[All Fields] OR "depressiveness"[All Fields] OR "depressives"[All Fields]) OR ("sleep initiation and maintenance disorders"[MeSH Terms] OR ("sleep"[All Fields] AND "initiation"[All Fields] AND "maintenance"[All Fields] AND "disorders"[All Fields]) OR "sleep initiation and maintenance disorders"[All Fields] OR "insomnia"[All Fields] OR "insomnias"[All Fields]) OR ("sleep wake disorders"[MeSH Terms] OR ("sleep"[All Fields] AND "wake"[All Fields] AND "disorders"[All Fields]) OR "sleep wake disorders"[All Fields] OR ("sleep"[All Fields] AND "disorder"[All Fields]) OR "sleep disorder"[All Fields]) OR ("stress"[All Fields] OR "stressed"[All Fields] OR "stresses"[All Fields] OR "stressful"[All Fields] OR "stressfulness"[All Fields] OR "stressing"[All Fields]) AND ("level"[All Fields] OR "levels"[All Fields])) OR ("infect"[All Fields] OR "infectability"[All Fields] OR "infectable"[All Fields] OR "infectant"[All Fields] OR "infectants"[All Fields] OR "infected"[All Fields] OR "infecteds"[All Fields] OR "infectibility"[All Fields] OR "infectible"[All Fields] OR "infecting"[All Fields] OR "infection s"[All Fields] OR "infections"[MeSH Terms] OR "infections"[All Fields] OR "infection"[All Fields] OR "infective"[All Fields] OR "infectiveness"[All Fields] OR "infectives"[All Fields] OR "infectivities"[All Fields] OR "infects"[All Fields] OR "pathogenicity"[MeSH Subheading] OR "pathogenicity"[All Fields] OR "infectivity"[All Fields]) OR ("epidemiology"[MeSH Subheading] OR "epidemiology"[All Fields] OR "incidence"[All Fields] OR "incidence"[MeSH Terms] OR "incidences"[All Fields] OR "incident"[All Fields] OR "incidents"[All Fields]) OR ("epidemiology"[MeSH Subheading] OR "epidemiology"[All Fields] OR "morbidity"[All Fields] OR "morbidity"[MeSH Terms] OR "morbidity"[All Fields] OR "morbidity"[All Fields] OR "morbidity"[All Fields] OR "morbidity"[All Fields])

## #2 Searching results =10,519,278

#3 (((((((((((((((((((("coronavirus"[MeSH Terms] OR "coronavirus"[All Fields]) OR "coronaviruses"[All Fields]) OR (((((((("covid 19"[All Fields] OR "covid 2019"[All Fields]) OR "severe acute respiratory syndrome coronavirus 2"[Supplementary Concept]) OR "severe acute respiratory syndrome coronavirus 2"[All Fields]) OR "2019 ncov"[All Fields]) OR "sars cov 2"[All Fields]) OR "2019ncov"[All Fields]) OR ("wuhan"[All Fields] AND ("coronavirus"[MeSH Terms] OR "coronavirus"[All

Fields])) AND (2019/12/1:2019/12/31[Date - Publication] OR 2020/1/1:2020/12/31[Date - Publication])) OR "SARSCOV2"[All Fields] OR ("severe acute respiratory syndrome coronavirus 2"[Supplementary Concept] OR "severe acute respiratory syndrome coronavirus 2"[All Fields]) OR "2019 ncov"[All Fields]) OR (((("covid 19"[Supplementary Concept] OR "covid 19"[All Fields]) OR "covid19"[All Fields]) AND "Ncov"[All Fields])) OR ("2019"[All Fields] AND ((("coronavirus"[MeSH Terms] OR "coronavirus"[All Fields]) OR "coronaviruses"[All Fields]))) OR (((("novel"[All Fields] OR "novel s"[All Fields]) OR "novels"[All Fields]) AND ((("coronavirus"[MeSH Terms] OR "coronavirus"[All Fields]) OR "coronaviruses"[All Fields]))) OR ("new"[All Fields] AND ((("coronavirus"[MeSH Terms] OR "coronavirus"[All Fields]) OR "coronaviruses"[All Fields]))) OR ("nouveau"[All Fields] AND ((("coronavirus"[MeSH Terms] OR "coronavirus"[All Fields]) OR "coronaviruses"[All Fields]))) OR ((("covid 19"[Supplementary Concept] OR "covid 19"[All Fields]) OR "covid19"[All Fields])) OR (((("acute"[All Fields] OR "acutely"[All Fields]) OR "acutes"[All Fields]) AND "respiratory"[All Fields] AND (((((((("syndrom"[All Fields] OR "syndromal"[All Fields]) OR "syndromally"[All Fields]) OR "syndrome"[MeSH Terms]) OR "syndrome"[All Fields]) OR "syndromes"[All Fields]) OR "syndrome s"[All Fields]) OR "syndromic"[All Fields]) OR "syndroms"[All Fields]) AND ((("coronavirus"[MeSH Terms] OR "coronavirus"[All Fields]) OR "coronaviruses"[All Fields]) AND "2"[All Fields])) OR "SARS-2"[All Fields]) OR ("severe acute respiratory syndrome coronavirus 2"[Supplementary Concept] OR "severe acute respiratory syndrome coronavirus 2"[All Fields]) OR "wuhan seafood market pneumonia virus"[All Fields])) OR "SARS"[All Fields]) OR (((("sars virus"[MeSH Terms] OR ("SARS"[All Fields] AND "virus"[All Fields])) OR "sars virus"[All Fields]) OR ("SARS"[All Fields] AND "cov"[All Fields])) OR "sars cov"[All Fields])) OR ((("sars virus"[MeSH Terms] OR ("SARS"[All Fields] AND "virus"[All Fields])) OR "sars virus"[All Fields])) OR ((("severe acute respiratory syndrome"[MeSH Terms] OR (((("severe"[All Fields] AND "acute"[All Fields]) AND "respiratory"[All Fields]) AND "syndrome"[All Fields])) OR "severe acute respiratory syndrome"[All Fields])) OR (((("coronavirus infections"[MeSH Terms] OR ("coronavirus"[All Fields] AND "infections"[All Fields])) OR "coronavirus infections"[All Fields]) OR "mers"[All Fields])) OR (((("middle east respiratory syndrome coronavirus"[MeSH Terms] OR (((("middle"[All Fields] AND "east"[All Fields]) AND "respiratory"[All Fields]) AND "syndrome"[All Fields]) AND "coronavirus"[All Fields])) OR "middle east respiratory syndrome coronavirus"[All Fields]) OR ("mers"[All Fields] AND "virus"[All Fields])) OR "mers virus"[All Fields])) OR (((("coronavirus infections"[MeSH Terms] OR ("coronavirus"[All Fields] AND "infections"[All Fields])) OR "coronavirus infections"[All Fields]) OR (((("middle"[All Fields] AND

"east"[All Fields]) AND "respiratory"[All Fields]) AND "syndrome"[All Fields])) OR "middle east respiratory syndrome"[All Fields])) OR (((("middle east respiratory syndrome coronavirus"[MeSH Terms] OR (((("middle"[All Fields] AND "east"[All Fields]) AND "respiratory"[All Fields]) AND "syndrome"[All Fields]) AND "coronavirus"[All Fields])) OR "middle east respiratory syndrome coronavirus"[All Fields]) OR (((("middle"[All Fields] AND "east"[All Fields]) AND "respiratory"[All Fields]) AND "syndrome"[All Fields]) AND "related"[All Fields]) AND "coronavirus"[All Fields])) OR "middle east respiratory syndrome related coronavirus"[All Fields])) OR (((("middle east respiratory syndrome coronavirus"[MeSH Terms] OR (((("middle"[All Fields] AND "east"[All Fields]) AND "respiratory"[All Fields]) AND "syndrome"[All Fields]) AND "coronavirus"[All Fields])) OR "middle east respiratory syndrome coronavirus"[All Fields]) OR ("mers"[All Fields] AND "cov"[All Fields])) OR "mers cov"[All Fields])

### #3 Searching results = 73,347

#4 (((((((((((((((((((((((((((("cohort studies"[MeSH Terms] OR ("cohort"[All Fields] AND "studies"[All Fields])) OR "cohort studies"[All Fields]) OR ("cohort"[All Fields] AND "study"[All Fields])) OR "cohort study"[All Fields]) OR (((("cohort studies"[MeSH Terms] OR ("cohort"[All Fields] AND "studies"[All Fields])) OR "cohort studies"[All Fields]) OR ("incidence"[All Fields] AND "study"[All Fields])) OR "incidence study"[All Fields])) OR (((("cohort studies"[MeSH Terms] OR ("cohort"[All Fields] AND "studies"[All Fields])) OR "cohort studies"[All Fields]) OR ("cohort"[All Fields] AND "analysis"[All Fields])) OR "cohort analysis"[All Fields])) OR (((("cohort studies"[MeSH Terms] OR ("cohort"[All Fields] AND "studies"[All Fields])) OR "cohort studies"[All Fields]) OR ("cohort"[All Fields] AND "analyses"[All Fields])) OR "cohort analyses"[All Fields])) OR (((("cohort studies"[MeSH Terms] OR ("cohort"[All Fields] AND "studies"[All Fields])) OR "cohort studies"[All Fields]) OR ("concurrent"[All Fields] AND "study"[All Fields])) OR "concurrent study"[All Fields])) OR (((("cohort studies"[MeSH Terms] OR ("cohort"[All Fields] AND "studies"[All Fields])) OR "cohort studies"[All Fields]) OR (("closed"[All Fields] AND "cohort"[All Fields]) AND "study"[All Fields])) OR "closed cohort study"[All Fields])) OR (((("cohort studies"[MeSH Terms] OR ("cohort"[All Fields] AND "studies"[All Fields])) OR "cohort studies"[All Fields]) OR (("historical"[All Fields] AND "cohort"[All Fields]) AND "study"[All Fields])) OR "historical cohort study"[All Fields])) OR (((("cross-sectional studies"[MeSH Terms] OR ("cross sectional"[All Fields] AND "studies"[All Fields])) OR "cross sectional studies"[All Fields]) OR ("prevalence"[All Fields] AND "study"[All Fields])) OR "prevalence study"[All Fields])) OR (((("cross-sectional studies"[MeSH Terms] OR ("cross sectional"[All Fields] AND "studies"[All Fields])) OR "cross sectional



studies"[All Fields]) OR (("disease"[All Fields] AND "frequency"[All Fields]) AND "survey"[All Fields])) OR (((("cross-sectional studies"[MeSH Terms] OR ("cross sectional"[All Fields] AND "studies"[All Fields])) OR "cross sectional studies"[All Fields]) OR ("cross"[All Fields] AND "sectional"[All Fields])) OR "cross sectional"[All Fields])) OR (((("cross-sectional studies"[MeSH Terms] OR ("cross sectional"[All Fields] AND "studies"[All Fields])) OR "cross sectional studies"[All Fields]) OR ("cross"[All Fields] AND "sectional"[All Fields])) OR "cross sectional"[All Fields])) OR (("empirical research"[MeSH Terms] OR ("empirical"[All Fields] AND "research"[All Fields])) OR "empirical research"[All Fields])) OR (((("qualitative research"[MeSH Terms] OR ("qualitative"[All Fields] AND "research"[All Fields])) OR "qualitative research"[All Fields]) OR ("qualitative"[All Fields] AND "study"[All Fields])) OR "qualitative study"[All Fields])) OR ((("qualitative research"[MeSH Terms] OR ("qualitative"[All Fields] AND "research"[All Fields])) OR "qualitative research"[All Fields])) OR (((("qualitative"[All Fields] OR "qualitatively"[All Fields]) OR "qualitatives"[All Fields]) AND (((("description"[All Fields] OR "descriptions"[All Fields]) OR "descriptive"[All Fields]) OR "descriptively"[All Fields]) OR "descriptives"[All Fields]))) OR (((("phenomenologic"[All Fields] OR "phenomenological"[All Fields]) OR "phenomenologically"[All Fields]) AND (((("studies"[All Fields] OR "study"[All Fields]) OR "study s"[All Fields]) OR "studying"[All Fields]) OR "studys"[All Fields]))) OR ((("grounded theory"[MeSH Terms] OR ("grounded"[All Fields] AND "theory"[All Fields])) OR "grounded theory"[All Fields])) OR (((("anthropology, cultural"[MeSH Terms] OR ("anthropology"[All Fields] AND "cultural"[All Fields])) OR "cultural anthropology"[All Fields]) OR "ethnographies"[All Fields]) OR "ethnography"[All Fields])) OR (((("anthropologies"[All Fields] OR "anthropology"[MeSH Terms]) OR "anthropology"[All Fields]) OR "anthropology s"[All Fields])) OR (((("behavioural research"[All Fields] OR "behavioral research"[MeSH Terms]) OR ("behavioral"[All Fields] AND "research"[All Fields])) OR "behavioral research"[All Fields])) OR (((("health services research"[MeSH Terms] OR ("health"[All Fields] AND "services"[All Fields]) AND "research"[All Fields])) OR "health services research"[All Fields]) OR ("action"[All Fields] AND "research"[All Fields])) OR "action research"[All Fields])) OR (((("mixed"[All Fields] OR "mixes"[All Fields]) OR "mixing"[All Fields]) OR "mixings"[All Fields]) AND (((("method s"[All Fields] OR "methods"[MeSH Terms]) OR "methods"[All Fields]) OR "method"[All Fields]) OR "methods"[MeSH Subheading])) OR "mixed-method"[All Fields]) OR (((((((((((("investigated"[All Fields] OR "investigates"[All Fields]) OR "investigating"[All Fields]) OR "investigation"[All Fields]) OR "investigations"[All Fields]) OR "investigative"[All Fields]) OR "investigator s"[All Fields]) OR "research personnel"[MeSH Terms]) OR

("research"[All Fields] AND "personnel"[All Fields])) OR "research personnel"[All Fields]) OR "investigator"[All Fields]) OR "investigators"[All Fields]) AND (((((((((((("research personnel"[MeSH Terms] OR ("research"[All Fields] AND "personnel"[All Fields])) OR "research personnel"[All Fields]) OR "researcher"[All Fields]) OR "researchers"[All Fields]) OR "research"[MeSH Terms]) OR "research"[All Fields]) OR "research s"[All Fields]) OR "researchable"[All Fields]) OR "researche"[All Fields]) OR "researched"[All Fields]) OR "researcher s"[All Fields]) OR "researches"[All Fields]) OR "researching"[All Fields]) OR "researchs"[All Fields]))) OR (((((((((((("investigated"[All Fields] OR "investigates"[All Fields]) OR "investigating"[All Fields]) OR "investigation"[All Fields]) OR "investigations"[All Fields]) OR "investigative"[All Fields]) OR "investigator s"[All Fields]) OR "research personnel"[MeSH Terms]) OR ("research"[All Fields] AND "personnel"[All Fields])) OR "research personnel"[All Fields]) OR "investigator"[All Fields]) OR "investigators"[All Fields]) AND (((("studies"[All Fields] OR "study"[All Fields]) OR "study s"[All Fields]) OR "studying"[All Fields]) OR "studys"[All Fields]))

**#4 Searching results = 6,302,298**

**#5 (#1 AND #2 AND #3 AND #4) Searching results =2380 (31 July 2020-PubMed)**
